# Supplementary material for: The influence of complexity: a bibliometric analysis of complexity science in healthcare
Source: PubMed Central journal article supplement — BMJ Open. 2019 Mar 23;9(3):e027308. doi: 10.1136/bmjopen-2018-027308 (PMC6475366; doi:10.1136/bmjopen-2018-027308), 2019-03-23
Supplement: bmjopen-2018-027308.draft_revisions.pdf [file bmjopen-2018-027308.draft_revisions.pdf]

# BMJ Open

BMJ Open is committed to open peer review. As part of this commitment we make the peer review history of every article we publish publicly available.

When an article is published we post the peer reviewers' comments and the authors' responses online. We also post the versions of the paper that were used during peer review. These are the versions that the peer review comments apply to.

The versions of the paper that follow are the versions that were submitted during the peer review process. They are not the versions of record or the final published versions. They should not be cited or distributed as the published version of this manuscript.

BMJ Open is an open access journal and the full, final, typeset and author-corrected version of record of the manuscript is available on our site with no access controls, subscription charges or pay-per-view fees (<http://bmjopen.bmj.com>).

If you have any questions on BMJ Open's open peer review process please email [info.bmjopen@bmj.com](mailto:info.bmjopen@bmj.com)

# BMJ Open

## The influence of complexity: A bibliometric analysis of complexity science in healthcare

|                               |                                                                                                                                                                                                                                                                                                                                                                                                                                                                                                                                                                                                                                                                                                                                                    |
|-------------------------------|----------------------------------------------------------------------------------------------------------------------------------------------------------------------------------------------------------------------------------------------------------------------------------------------------------------------------------------------------------------------------------------------------------------------------------------------------------------------------------------------------------------------------------------------------------------------------------------------------------------------------------------------------------------------------------------------------------------------------------------------------|
| Journal:                      | <i>BMJ Open</i>                                                                                                                                                                                                                                                                                                                                                                                                                                                                                                                                                                                                                                                                                                                                    |
| Manuscript ID                 | bmjopen-2018-027308                                                                                                                                                                                                                                                                                                                                                                                                                                                                                                                                                                                                                                                                                                                                |
| Article Type:                 | Research                                                                                                                                                                                                                                                                                                                                                                                                                                                                                                                                                                                                                                                                                                                                           |
| Date Submitted by the Author: | 16-Oct-2018                                                                                                                                                                                                                                                                                                                                                                                                                                                                                                                                                                                                                                                                                                                                        |
| Complete List of Authors:     | Churruca, Kate; Macquarie University, Australian Institute of Health Innovation, Centre for Healthcare Resilience and Implementation Science<br>Pomare, Chiara; Macquarie University, Australian Institute of Health Innovation, Centre for Healthcare Resilience and Implementation Science<br>Ellis, Louise A.; Macquarie University, Australian Institute of Health Innovation, Centre for Healthcare Resilience and Implementation Science<br>Long , Janet; Macquarie University, Australian Institute of Health Innovation, Centre for Healthcare Resilience and Implementation Science<br>Braithwaite, Jeffrey; Macquarie University, Australian Institute of Health Innovation, Centre for Healthcare Resilience and Implementation Science |
| Keywords:                     | Health & safety < HEALTH SERVICES ADMINISTRATION & MANAGEMENT, HEALTH SERVICES ADMINISTRATION & MANAGEMENT, Health policy < HEALTH SERVICES ADMINISTRATION & MANAGEMENT                                                                                                                                                                                                                                                                                                                                                                                                                                                                                                                                                                            |
|                               |                                                                                                                                                                                                                                                                                                                                                                                                                                                                                                                                                                                                                                                                                                                                                    |

SCHOLARONE™  
Manuscripts

1  
2  
3  
4  
5  
6  
7  
8  
9  
10  
11  
12  
13  
14 **The influence of complexity:**  
15  
16 **A bibliometric analysis of complexity science in healthcare**  
17  
18  
19  
20

21 **Authors**

22  
23 Kate Churruca<sup>1</sup>, Chiara Pomare<sup>1</sup>, Louise A Ellis<sup>1</sup>, Janet C Long<sup>1</sup>, Jeffrey Braithwaite<sup>1</sup>  
24  
25

26 **Author Affiliations**

27  
28 <sup>1</sup> Centre for Healthcare Resilience and Implementation Science, Australian Institute of Health  
29 Innovation, Macquarie University, Australia  
30  
31

32  
33 **Corresponding author**

34  
35 Dr Kate Churruca

36  
37 Centre for Healthcare Resilience and Implementation Science, Australian Institute of Health  
38 Innovation, Macquarie University  
39 Level 6, 75 Talavera Rd, Macquarie University,  
40 NSW 2109 Australia  
41  
42

43  
44 Email: [Kate.churruca@mq.edu.au](mailto:Kate.churruca@mq.edu.au)

45 Phone: +61 2 9850 2485  
46  
47  
48  
49

50 **Word count**

51  
52 3,800  
53  
54  
55  
56  
57  
58  
59  
60

## ABSTRACT

### Objectives

To analyse trends in the academic literature applying complexity science to healthcare, focusing specifically on bibliometric characteristics and indicators of influence.

### Design

This study reports a bibliometric analysis via a systematic search of the academic literature applying complexity science to healthcare.

### Method

A search of four academic databases was performed. Articles details were downloaded and screened against inclusion criteria (peer-reviewed journal articles applying complexity science to healthcare). Publication and content data were then collected from included articles, with analysis focusing on trends over time in the types and topics of articles, and where they are published. We also analysed the influence of this body of work through citation and network analyses.

### Results

Articles on complexity science in healthcare were published in 268 journals, though a much smaller subset were responsible for a substantial proportion of this literature. The United States contributed the largest number of articles, followed by the United Kingdom, Canada, and Australia. Over time, there were increases in the number of empirical and review articles published, relative to non-empirical contributions. However, in general, non-empirical literature were more influential, with a series of introductory conceptual papers being the most influential based on both overall citations and their use as index references within a citation network. The most common topics of focus were health systems and organisations generally, and education, with recent uptake in research, policy, and change and improvement.

### Conclusions

This study identified changes in the types of articles on complexity science in healthcare published over time, and their content. There was evidence to suggest a shift from conceptual work to the application of concrete improvement strategies and increasingly in-depth examination of complex healthcare systems. We also identified variation in the influence of this literature at article-level, and to a lesser extent by topic of focus.

### Key words

1  
2 Complexity science, Healthcare, Bibliometrics, Review, Complex adaptive systems, Health care  
3  
4

## 5 **ARTICLE SUMMARY**

### 6

### 7 **Strengths and limitations of this study**

#### 8

- 9 - Use of an inclusive search strategy based on previously published reviews and including non-  
10 empirical and non-English language articles.  
11
- 12 - Articles coded by multiple coders into topic themes to determine popular and emerging areas of  
13 interest for complexity science in healthcare.  
14
- 15 - A focus on citations and index references as a proxy for influence; citation analysis tends to  
16 prioritise older contributions that have had more time to accumulate cites.  
17
- 18 - Inclusion of only peer-reviewed articles, minimizing the potential influence of some prominent  
19 non-peer-reviewed contributions.  
20  
21  
22  
23  
24  
25  
26  
27  
28  
29  
30  
31  
32  
33  
34  
35  
36  
37  
38  
39  
40  
41  
42  
43  
44  
45  
46  
47  
48  
49  
50  
51  
52  
53  
54  
55  
56  
57  
58  
59  
60

# The influence of complexity: A bibliometric analysis of complexity science in healthcare

## BACKGROUND

Complexity science provides a way of understanding nonlinearity, in which causation is problematic and multi-faceted, and emergent behaviours are the norm.[1] It developed out of diverse academic traditions, including computer science, physics, sociology, anthropology, economics and mathematics. Different systems can be understood using the complexity paradigm—it finds commonalities and patterns in the behaviour of systems comprised of very different agents (ants, cells, humans, societies, species, bacteria), often labelled via a convenient phrase: complex adaptive systems (CASs).[2] Such systems were initially recognised for displaying “weird”, chaotic and dynamic behaviours; thus, chaos theory was developed to explain such phenomenon. However, a focus only on chaos failed to account for why complex systems also often exhibit degrees of homeostasis—that is, they are somehow balanced between the chaotic and unpredictable on the one hand, and the orderly and predictable on the other—for the most part, most of the time.[3] Complexity science provides an understanding of systems that are between phase transitions and are often found just “at the edge of chaos”.[1, 3]

The study of complexity challenges traditional approaches to science that favour a controlled view of the world, where variables are held constant and where outcomes are predictable because causes and effects are related, and construed as linear arrangements.[4] CASs are not well-explained through studies that aim for such reduction, decomposition and cause-effect logic, breaking problems down into manageable parts and studying these components individually in an attempt to understand the whole.[5] In short, CASs are *different from*, and *more than* the sum of their parts.

Complexity science has pervaded many disciplines, making its way, for example, into the social sciences and the study of human systems and organisations.[1, 6] The adoption of complexity science principles has been particularly notable in health-related fields, with healthcare systems worldwide recognised as excellent examples of CASs because of the diverse array of agents involved (doctors, patients, nurses, consumer groups, politicians, non-government organisations) and the enormous number of interactions among them.[7, 8] This work gained momentum at the beginning of this century, with the publication of a number of conceptual contributions discussing the application of complexity science principles in areas of healthcare like clinical practice,[9] education,[10] and

1  
2 healthcare management.[11, 12] Since this time, the potential of complexity science in understanding  
3 and tackling some of the otherwise intractable challenges of delivering healthcare—including patient  
4 safety,[13] interprofessional collaboration,[14] sustained improvement,[15] and managing uncertainty  
5 [16]—has been considered. Empirical studies applying the principles of complexity science to  
6 healthcare have also proliferated. Almost two decades ago, Anderson and McDaniel [17] used  
7 complexity theory to understand nurses' decision-making in nursing homes in the United States. Much  
8 more recently, Barasa, Molyneux [18] examined hospitals as CASs in their case study of financing  
9 decisions in Kenya.

10  
11  
12  
13  
14  
15  
16  
17 There are signs that literature on complexity science in healthcare is approaching maturity, with  
18 literature reviews of the empirical research now being undertaken,[19] especially in the context of  
19 health services interventions,[20] as well as publication of a systematic review of empirical and non-  
20 empirical complexity ideas.[21] As a complement to these contributions, now is an appropriate time to  
21 examine the influence and spread of this literature in greater prevision. Towards this end, bibliometrics  
22 is an approach that looks at publication patterns in an area of research literature, including trends over  
23 time and globally, and the influence of articles, and the authors and journals publishing such works,  
24 indicated by citations.

## 31 32 33 **Aim**

34  
35 This study aimed to analyse trends in the academic literature on applying complexity science to  
36 healthcare, focusing specifically on bibliometric characteristics. We also analysed the influence of this  
37 body of work through citation and network analyses.

## 38 39 40 41 42 **METHOD**

### 43 44 **Systematic search of the literature**

#### 45 46 **Databases**

47  
48 In April 2018, the Cochrane Database of Systematic Reviews, CINAHL, EMBASE, and all databases  
49 of Web of Science, which includes MEDLINE, were searched using keywords documented below. The  
50 general search strategy was based on that taken by Thompson et al.,[19] with a range of search terms  
51 associated with complexity theory used to account for broad indexing. This included “chaos theory”,  
52 because complexity is often described as developing out of,[1] as well as encompassing the more  
53  
54  
55  
56  
57  
58  
59  
60

1  
2 specific concept of, chaos.[22] Keywords related to healthcare and health systems were also searched.  
3  
4 No date restrictions were used.

## 5 6 Keywords

- 7 1. “Complexity theory” OR “complexity science” OR “complex adaptive system” OR  
8 “complexity thinking” OR “complex responsive process theory” OR “chaos theory”
- 9 2. healthcare OR “health care” OR “health-care” OR hospital OR “health facilit\*” OR “acute  
10 care” OR “health organi\*” OR “health system” OR “primary care” OR “general practice” OR  
11 “aged care” OR “nurs\* home OR medic\* OR clinic\* OR nurs\* OR health  
12  
13  
14  
15

16 Citations returned from these searches were downloaded into the reference management software  
17 Endnote, and duplicates were removed. References were then exported to a Microsoft Excel  
18 spreadsheet for screening. Articles were reviewed against inclusion criteria and exclusion criteria.  
19  
20  
21  
22  
23  
24  
25  
26  
27  
28  
29  
30  
31  
32  
33  
34  
35  
36  
37  
38  
39  
40  
41  
42  
43  
44  
45  
46  
47  
48  
49  
50  
51  
52  
53  
54  
55  
56  
57  
58  
59  
60  
References meeting inclusion criteria were classified for bibliometric analysis.

## 25 Inclusion and exclusion criteria

26 Because we were looking at influence, empirical and non-empirical papers (e.g., commentaries,  
27 conceptual papers and reviews) published in peer-reviewed academic journals and applying complexity  
28 science to healthcare were included in the analysis. We defined healthcare broadly to include not only  
29 the professionals involved (e.g., nurses, doctors, administrators) and sites of healthcare delivery (e.g.,  
30 hospitals, nursing homes), but also education, policy, processes and ethical or research issues related to  
31 healthcare. Health promotion and public health articles were initially retained for full-text screening.  
32 However, they were ultimately only included if they discussed healthcare sites, professions or aspects  
33 of care delivery, rather than, for example, population-based health promotion interventions and issues.  
34  
35  
36  
37  
38  
39  
40  
41

42 Letters to the editor and editorial papers that only described the contents of an issue were excluded,  
43 because they were not thought to sufficiently contribute to the spread of complexity ideas within  
44 healthcare. Books, book chapters and conference proceedings were also excluded because bibliometric  
45 data is often not available or incomplete for such publications. Articles that were not originally  
46 published in English but provided an English-language abstract were included in the bibliometric  
47 review if, based on this information, they were found to meet all of the inclusion criteria and none of  
48 the exclusion criteria.  
49  
50  
51  
52  
53  
54  
55

## 56 Bibliometric analysis



## Stage one: Review of article publication data

First bibliometric data on the article, including the year of publication, the journal in which it was published, the corresponding author and their country of residence, were captured from the full-text, or the journal or indexing database where full-text was unavailable (either inaccessible to the authors or not available in English).

## Stage two: Review of article content

Articles were then classified in greater detail according to their content, including type of article and focus. This involved classifying articles as empirical or non-empirical. The empirical papers were further categorized according to their use of complexity science (e.g., the covered aspects of prediction, conceptual framework, data analysis, or interpretation of findings) following the schema of Thompson et al.[19] Non-empirical papers were classified as: commentaries and editorials, conceptual discussions, conceptual case studies, and protocols. Reviews were also included and classified.

Two of the authors (KC and CP) performed a content analysis on the main focus(es) of all the included articles. This involved inductive descriptive coding of each paper, then comparisons, modifications and expansions of codes to identify the most common topic themes in the literature applying complexity science to healthcare. Generally, details in the abstract and title, in addition to database indexing information, were sufficient to classify whether an article was empirical or non-empirical, and also its main focus. However, some articles did not have an abstract, or the abstract detail was insufficient. Full-text review was conducted during this stage (where full-text was available in English) to ensure the most accurate classification.

## Stage three: Analysis of influence

The number of citations an article had received over time was used to calculate influence, with citations collected from Google Scholar in July 2018. We also examined influence by identifying one or more “index” reference(s) for each of the full-text articles reviewed.<sup>1</sup> An index was defined as the most influential, prominent or leading reference(s) cited by an included article that also focused on complexity science within healthcare (as compared with complexity science in biology, management or generally). However, unlike papers in this review, an index reference need not be a peer-reviewed

---

<sup>1</sup> Where full-text was available (n=377)

1  
2 publication; this criterion allowed us to consider influence from other sorts of academic outputs. Where  
3 possible, we identified an index reference based on attribution by the authors of that paper, for  
4 example, a statement like: “In his appendix to *Crossing the Quality Chasm*,<sup>12</sup> Plsek<sup>13</sup> suggests that,  
5 rather than using the principles of mechanical systems to try to improve health care, innovators should  
6 employ the principles of complex adaptive systems”.<sup>[23, p. 17]</sup> However, in the absence of an explicit  
7 statement to this effect, we took the first reference(s) cited when introducing the notion of complexity  
8 science applied to healthcare. Some articles included did not have index references, and others were  
9 unable to be searched (i.e., full-text not available).  
10  
11  
12  
13  
14  
15

16  
17 Index references and their citing articles were used in a network analysis, visually constructed in  
18 Gephi, version 0.9.2. Network analysis uses graph theory to map and measure relationships among  
19 nodes.<sup>[24]</sup> In this case, the nodes in the network were the articles in the review as well as any index  
20 reference(s) they cited, while relationships were directional tie(s) to an index reference (e.g. articles X  
21 cited article Y as an index reference). Articles that did not cite an index reference, and were not  
22 themselves used as an index reference for another article (i.e., an isolate), were removed from the  
23 network analysis, on the basis that they did not contribute to understanding influence. In visualizing the  
24 network, the main topic theme of the research output was used to differentiate different categories of  
25 articles and identify any possible clustering, as well as distinguish influential index references that were  
26 not captured by our review strategy. The most influential academic outputs in the network were  
27 assessed using in-degree calculation (the number of inward directed ties to a node i.e., the number of  
28 times an index reference was cited by other articles).  
29  
30  
31  
32  
33  
34  
35  
36  
37  
38  
39

## 40 RESULTS

41  
42 A total of 2,505 articles were returned from searches across the four databases and downloaded into  
43 Endnote X8. Following removal of duplicates, citation details (n=2,382) were exported to Microsoft  
44 Excel for screening of their titles and abstracts against inclusion criteria. Five-hundred and forty-seven  
45 references were retained, though a further 93 were excluded at stages one and two of data analysis  
46 because, upon review, they did not meet inclusion criteria (reasons documented in Table 1). This left  
47 454 articles that were subjected to the bibliometric analysis. Figure 1 presents the search strategy.  
48  
49  
50  
51  
52  
53

54 INSERT FIGURE 1 HERE  
55  
56  
57  
58  
59

1  
2  
3  
4  
5  
6  
7  
8  
9  
10  
11  
12  
13  
14  
15  
16  
17  
18  
19  
20  
21  
22  
23  
24  
25  
26  
27  
28  
29  
30  
31  
32  
33  
34  
35  
36  
37  
38  
39  
40  
41  
42  
43  
44  
45  
46  
47  
48  
49  
50  
51  
52  
53  
54  
55  
56  
57  
58  
59  
60

For peer review only

**Table 1. Reasons for exclusion at full text stage.**

| Reason for exclusion                                | Number of articles |
|-----------------------------------------------------|--------------------|
| Not about complexity science                        | 12                 |
| Not in healthcare                                   | 31                 |
| Not a peer-reviewed academic journal article        | 49                 |
| Article information unable to be found <sup>1</sup> | 1                  |
| Total                                               | 93                 |

<sup>1</sup> Rouse, W. B. (2000). Managing complexity: disease control as a complex adaptive system. *Information Knowledge Systems Management*, 2(2), 143-165 was published in a now discontinued journal. Citation data unavailable in Google Scholar, precluding bibliometric analysis.

Of the 454 articles considered eligible for inclusion, the research team was able to access full-text in English for 379 articles, permitting a more detailed and accurate classification of content. The remaining 75 articles included in the bibliometric analysis were comprised of 49 articles in English-language journals where full-text was inaccessible, and 26 where full-text was not available in English. See Appendix 1 for summary of data extraction.

### Stage one results: Article publication data

#### Publishing of articles on complexity science applied to healthcare

The 454 included articles came from 268 different journals, which were primarily health-focused, but varied in scope. Table 2 displays the journals publishing the highest number of articles in the field. The journal publishing the most articles on complexity science applied to healthcare was the *Journal of Evaluation in Clinical Practice* (n=24), followed by *Health Care Management Review* (n=18), and *Social Science & Medicine* (n=11).

**Table 2. Top 13 journals publishing articles on complexity science applied to healthcare**

| Top journals publishing on complexity science in healthcare | Number of articles |
|-------------------------------------------------------------|--------------------|
| Journal of Evaluation in Clinical Practice                  | 24                 |
| Health Care Management Review                               | 18                 |
| Social Science & Medicine                                   | 11                 |
| BMC Health Services Research                                | 8                  |
| Implementation Science                                      | 8                  |
| Journal of Advanced Nursing                                 | 8                  |

|    |                                          |   |
|----|------------------------------------------|---|
| 1  |                                          |   |
| 2  | Medical Education                        | 8 |
| 3  | Annals of Family Medicine                | 6 |
| 4  | Academic Medicine                        | 5 |
| 5  | BMJ                                      | 5 |
| 6  | International Journal of Integrated Care | 5 |
| 7  | Journal of Interprofessional Care        | 5 |
| 8  | Journal of Nursing Administration        | 5 |
| 9  |                                          |   |
| 10 |                                          |   |
| 11 |                                          |   |
| 12 |                                          |   |
| 13 |                                          |   |

14

15 Using the corresponding author's affiliation as an indicator, we determined that articles applying

16 complexity science principles to healthcare came from 33 countries. The United States of America

17 (n=199, 43.8%), the United Kingdom (n=82, 18.1%), Canada (n=49, 10.8%) and Australia (n=23,

18 5.1%) accounted for nearly three-quarters of the included papers, as can be seen from Figure 2. Other

19 countries contributing substantially were the Netherlands (n=12, 2.6%) and Brazil (n=17, 3.7%); for

20 Brazil, this included 11 (2.4%) papers published in non-English language journals. Despite the

21 concentration of articles among only a few countries, there was evidence for increasing globalisation

22 over time; prior to 2003, the only countries publishing literature on complexity science applied to

23 healthcare were the UK, USA, Canada and Australia, while in 2017 alone articles came from 17

24 different countries.

25

26

27

28

29

30

31

32

33

34 INSERT FIGURE 2 HERE

35

36

## 37 Stage two results: Article content

38

### 39 Types of articles published

40

41 The majority of the literature (n=277, 62.8%)<sup>2</sup> applying complexity science to healthcare has been non-

42 empirical, mostly conceptual discussions (n=178), followed by conceptual case-studies (n=39),

43 methodological and practical articles (n=23), commentaries and editorials (n=18), unstructured and

44 narrative reviews (n=12), and protocol papers (n=7). However, the publication of empirical papers

45 (n=149, 33.9%) increased, especially over the last five years; these articles predominantly employed

46 complexity science as a conceptual framework (n=109), or to a lesser extent, for data collection (n=4)

47 or analysis (n=12), or the interpretation of findings (n=22).<sup>3</sup> Publication of structured and systematic

48

49

50

51

52

53

54 <sup>2</sup> N=13 unable to be classified because full-text was inaccessible and there was insufficient information in the abstract.

55 Percentage calculated on the 441 articles able to be classified.

56 <sup>3</sup> Full-text unavailable for two empirical articles. There was not enough detail in the title and abstract to determine the use of

57 complexity science.

58

59

60

1 reviews (n=15, 3.4%) that either explicitly reviewed complexity science in healthcare [e.g., 19, 20, 25]  
 2 or used these principles as a lens or framework for their review [e.g., 26, 27] also increased over the  
 3 last decade. These trends are captured in Figure 3.  
 4  
 5

6  
 7 INSERT FIGURE 3 HERE  
 8  
 9

## 10 Content of articles published

11 Delving deeper into the content of these articles, we coded the main focus(es) of each of the articles  
 12 included in the review, then developed broader categories representing common topic themes for  
 13 complexity science applied to healthcare. Multiple topic themes were often evident in a single article,  
 14 so themes are not mutually exclusive. These topic themes are displayed in Table 3. The most common  
 15 topic themes involved a focus on *healthcare settings* (especially *primary care* and *hospitals*), followed  
 16 by *health systems and organisations generally*, *healthcare professionals* (particularly *nursing* and  
 17 *medicine*), and *education*. Furthermore, while *healthcare professionals*, and *education* were early  
 18 topics for complexity science in healthcare, it was not until 2006 that these principles were taken up in  
 19 articles focused on *change, improvement and implementation*, *research* and *policy* (see Figure 4).  
 20  
 21

22 **Table 3. Topic themes for articles on complexity science applied to healthcare.**

23  
 24  
 25  
 26  
 27  
 28  
 29

| 30 Topic themes                                  | 31 Number of articles <sup>1</sup> | 32 Citations per year |
|--------------------------------------------------|------------------------------------|-----------------------|
| 33 Management and leadership                     | 49                                 | 4.0                   |
| 34 Education                                     | 59                                 | 5.9                   |
| 35 Teamwork, collaboration and care coordination | 31                                 | 4.8                   |
| 36 Health systems and organisations generally    | 76                                 | 6.0                   |
| 37 Public health and health promotion            | 31                                 | 4.4                   |
| 38 Safety, quality and performance               | 22                                 | 2.4                   |
| 39 Change, improvement and implementation        | 39                                 | 5.1                   |
| 40 Research                                      | 14                                 | 4.7                   |
| 41 Healthcare policy                             | 10                                 | 2.3                   |
| 42 Health settings                               | 146                                | 3.4                   |
| 43 - <i>aged and nursing care</i>                | 21                                 | 5.7                   |
| 44 - <i>ambulatory care</i>                      | 2                                  | 0.8                   |
| 45 - <i>chronic care</i>                         | 9                                  | 4.3                   |
| 46 - <i>hospital</i>                             | 53                                 | 2.7                   |
| 47 - <i>mental health</i>                        | 6                                  | 1.9                   |
| 48 - <i>paediatrics</i>                          | 3                                  | 3.9                   |

49  
 50  
 51  
 52  
 53  
 54  
 55  
 56  
 57  
 58

|    |                                |    |     |
|----|--------------------------------|----|-----|
| 1  |                                |    |     |
| 2  | - <i>palliative care</i>       | 4  | 1.3 |
| 3  | - <i>primary care</i>          | 48 | 6.4 |
| 4  |                                |    |     |
| 5  | Healthcare professionals       | 71 | 3.6 |
| 6  |                                |    |     |
| 7  | - <i>allied health</i>         | 2  | 0.3 |
| 8  | - <i>medicine</i>              | 19 | 7.3 |
| 9  |                                |    |     |
| 10 | - <i>nursing and midwifery</i> | 44 | 2.7 |
| 11 | - <i>general</i>               | 6  | 4.0 |
| 12 |                                |    |     |
| 13 | Other                          | 33 | 3.5 |
| 14 |                                |    |     |

<sup>1</sup> Topic themes are not mutually exclusive, except within subthemes of health settings and healthcare professionals.

INSERT FIGURE 4 HERE

## Stage three results: Examination of influence

### Citation analysis

Influence was calculated using the number of citations each article received averaged by the number of years elapsed since publication. For the field, this amounted to an overall average of 4.9 citations a year per article, although there was high degree of skewedness (Mdn= 2.5, Min=0, Max=110.1).<sup>4</sup> At article-level, influence was considered separately for empirical and non-empirical contributions, which included structured reviews. As can be seen in Table 4, generally, non-empirical articles were more influential than empirical ones. The most influential article by a substantial margin was the conceptual discussion by Plsek and Greenhalgh,[5] published in 2001 in the BMJ, to introduce a series of papers on complexity in healthcare, many of which in this series also featured in the top 10. A brief description of the main focus of each paper, which was used as the basis for developing topic themes, is present in Table 4. For non-empirical articles, the focus tended to be broader and there were a number of common themes, including discussion of application of complexity science to healthcare generally,[5] clinical practice,[9, 28] and education.[29] The empirical articles were however more varied and specific in focus, though nursing homes and primary care were common areas of interest. Influence was also examined according to the topic themes identified in stage two; based on this analysis, we found that articles focusing on complexity science specifically in relation to medical professionals were most influential, followed by articles in the primary care setting and considering health systems and organisations generally (Table 3).

<sup>4</sup> Articles published in 2018 not included in calculation.

## Network analysis of index references

The influence of included articles and other research outputs on complexity science applied to healthcare was further investigated in the network analysis of index references, depicted in the sociogram in Figure 5. The network consisted of 514 nodes (i.e., academic outputs) and 657 directional ties (which output cited another output as an index reference). Of these nodes, 276 (53.7%) were used as an index reference by at least one other research output in this network (indegree >0). The nodes with the highest in-degree are listed in Table 5. The most influential node in the network was the article by Plsek and Greenhalgh,[5] which was cited as an index reference for complexity science in healthcare by 71 other articles in the review. Visualisation revealed an absence of clustering by topic theme; that is, rather than seeing index referencing only between research outputs that explore similar ideas (e.g. management only uses other management outputs as index references), there were connections among the different topic themes. Finally, there were 183 outputs (35.6%) used as index references that had not been included in our review.



**Table 4. Most influential empirical and non-empirical articles on complexity science applied to healthcare.**

| <b>Empirical article</b>  | <b>Citations per year</b> | <b>Main focus description</b>                | <b>Non-empirical and review articles</b> | <b>Citations per year</b> | <b>Main focus description</b>      |
|---------------------------|---------------------------|----------------------------------------------|------------------------------------------|---------------------------|------------------------------------|
| Anderson, Issel [30]      | 29.4                      | nursing home                                 | Plsek and Greenhalgh [5]                 | 110.1                     | healthcare - general               |
| O'Sullivan, Kuziemsy [31] | 22.6                      | public health - health promotion in disaster | Fraser and Greenhalgh [10]               | 50.6                      | education                          |
| Hanseth, Jacucci [32]     | 21.8                      | hospital – EHR/IT                            | Plsek and Wilson [12]                    | 41.4                      | leadership                         |
| Monrouxe, Rees [33]       | 18.4                      | education - medicine                         | Best, Greenhalgh [27]                    | 40.7                      | healthcare system - transformation |
| Oyeleye, Hanson [34]      | 16.8                      | nursing - workplace bullying                 | Goldberger [35]                          | 39.6                      | clinical practice                  |
| Anderson, Corazzini [36]  | 15.9                      | nursing homes - job satisfaction             | Braa, Hanseth [37]                       | 35.6                      | EHR/IT - developing countries      |
| Ssengooba, McPake [38]    | 15.5                      | performance targets - health systems         | Wilson, Holt [9]                         | 28.1                      | clinical - general                 |
| Miller, McDaniel [39]     | 14.8                      | primary care                                 | Frye and Hemmer [40]                     | 28.0                      | education                          |
| Boustani, Sachs [41]      | 14.5                      | primary care - dementia care                 | Bleakley [42]                            | 25.7                      | education                          |
| Provost, Lanham [13]      | 14.0                      | collaboration and teamwork - safety          | Anderson, Crabtree [43]                  | 25.1                      | healthcare organisations           |

INSERT FIGURE 5 HERE

**Table 5. In-Degree**

|    | <b>Most popular index references in network</b>                   | <b>In-degree</b> | <b>Topic theme of complexity</b> |
|----|-------------------------------------------------------------------|------------------|----------------------------------|
| 1  | Plsek, P. E. and T. Greenhalgh (2001)                             | 71               | Health systems and organisations |
| 2  | IOM and P. E. Plsek [44]                                          | 25               | Not in review                    |
| 2* | Plsek, P. E. and T. Wilson [12]                                   | 25               | Management/leadership            |
| 3  | Wilson, T., T. Holt and T. Greenhalgh Wilson, Holt [9]            | 19               | Healthcare setting               |
| 3* | Zimmerman, B., C. Lindberg, and P. Plsek Zimmerman, Lindberg [45] | 19               | Not in review                    |
| 4  | Fraser, S. W. and T. Greenhalgh [10]                              | 18               | Education                        |

\* indicates equal levels of in-degree.

## DISCUSSION

Complexity science has brought a radical shift in how we think about many of the dynamic relationships and systems present in our world, with healthcare being no exception. This bibliometric review of complexity science in healthcare has identified a number of trends in the types of articles published over time, and the influence of this body of work. It has documented increasing use of a complex systems lens to describe, understand and study aspects of healthcare over the past two and a half decades, with literature emanating from numerous countries and being published in many journals. While there has been considerable concentration, with only a few countries (the USA, UK, Canada and Australia) and journals responsible for a disproportionately high number of contributions, there is also evidence of increasing globalisation of complexity science in healthcare literature over the years.

Our findings indicate recent increases in empirical research and reviews, relative to non-empirical contributions, suggesting a move from the conceptual to the concrete with regard to understanding complexity in healthcare. A recent review by Thompson, Fazio [19] though, indicates that empirical work in health services research is often inconsistent and lacks sophistication in the use of complexity science methods; similarly, Brainard and Hunter [20] reviewed complexity-informed interventions and noted that there is often a poor operationalisation of complexity science principles. In this regard, our

own analysis of non-empirical research has identified a preponderance of broad conceptual discussions, rather than practical or methods articles of *how* to apply complexity science in healthcare.

This bibliometric review further demonstrated that complexity science has permeated diverse contexts and topic areas within healthcare, being particularly prominent in articles on management, education, primary care and hospitals. Interest in research as well as change, improvement and implementation have emerged more recently. In regards to the former, the evolving trend for publishing articles about researching complexity in healthcare suggests increasing awareness of the need to operationalise complexity concepts. Meanwhile, for the latter, a nascent focus on change and improvement mirrors the formalisation of implementation science as a field.[e.g., 46] It is plausible that these will become more prominent target areas in the future for attention by complexity scientists.

Although there was variation in the degree of influence these topics had, based on average citations, our network analysis demonstrated limited clustering according to theme, which suggests cross-fertilisation of ideas across the broader body of work on complexity science in healthcare. At the same time, a number of early contributions on complexity science in healthcare have become widely-recognised in the field as the most influential both in terms of their total citations and their consistent status as index references for other articles.[e.g., 5, 9, 10, 12]

### **Strengths and limitations**

The search strategy for this bibliometric analysis was based on that of a published review.[19] Furthermore, our inclusion criteria were designed to be as inclusive as possible, such as in recognising non-English language publications. Peer-reviewed journal articles are best suited to bibliometric and particularly citation analyses, rather than other academic outputs such as books, book chapters and reports, hence this being a requirement for inclusion in our review.[47, 48] While well-justified, our network analysis demonstrates the limits of this approach in that a substantial portion of index references identified were not included in our review, particularly a prominent book by Zimmerman, Lindberg [45] and Plsek's appendix to an Institute of Medicine Report.[44] Despite this limitation, these contributions were included to some extent through our identification of index references.

Furthermore, the citation analysis, as well as our focus on index references, has arguably better illustrated long-term impact than the emerging influence of new and up-and-coming work on

1  
2 complexity science in healthcare, because the publication process can be lengthy, creating delays in the  
3 accumulation of citations.[49] Hence, more recent articles, which we have found influential in guiding  
4 our own research, such as those by Leykum, Lanham and their colleagues [e.g., 50, 51] may be  
5 revealed as more influential in the coming years. The use of “altmetrics” (e.g., social media mentions)  
6 in future bibliometric reviews could facilitate assessment of more immediate impact.[52] Lastly, some  
7 contributions influential in the field have straddled public health and social care, such as the work of  
8 Hawe [53] and Sterman,[54] and so were not included based on our search strategy and inclusion  
9 criteria.  
10  
11  
12  
13  
14  
15

## 16 17 **CONCLUSION**

18  
19 This study conducted a bibliometric analysis of the peer-reviewed literature in the evolving academic  
20 field of complexity science applied to healthcare. We identified a number of trends in where this work  
21 has been conducted and published. There were also clear shifts in the types of articles published over  
22 time, and their content. As a field, the application of complexity science to healthcare appears to be  
23 increasingly focused on *doing* complexity-informed research, rather than discussions of its conceptual  
24 and theoretical contours. Finally, we found substantial variation in the influence of this literature at  
25 article-level, and to a lesser extent by topic of focus.  
26  
27  
28  
29  
30  
31  
32  
33  
34  
35  
36  
37  
38  
39  
40  
41  
42  
43  
44  
45  
46  
47  
48  
49  
50  
51  
52  
53  
54  
55  
56  
57  
58  
59  
60

## Acknowledgements

The authors would like to thank Ms Prakriti Kunwar for her assistance in conducting the search, and title/abstract review.

## Author Contributions

KC had the original idea for the article and devised the search strategy with support from LAE, JCL and JB. KC oversaw the search, and conducted the title/abstract review and analysis with assistance from CP. CP performed the network analysis of influence. KC drafted the manuscript. CP, LAE, JCL and JB critically revised the manuscript. All authors agreed upon the final version of the manuscript.

## Funding

JB is supported by multiple grants, including the National Health and Medical Research Council (NHMRC) Partnership Grant for Health Systems Sustainability (ID: 9100002).

## Competing Interests

None declared.

## Abbreviations

CASs Complex Adaptive Systems

## References

1. Byrne, D. Complexity theory and the social sciences: An introduction. London: Routledge, 2002.
2. Chu, D, Strand, R, and Fjelland, R. Theories of complexity. *Complexity*, 2003; 8(3): 19-30.
3. Waldrop, MM. Complexity: The emerging science at the edge of order and chaos: Simon and Schuster, 1993.
4. Dent, EB. Complexity science: A worldview shift. *Emergence*, 1999; 1(4): 5-19.
5. Plsek, P and Greenhalgh, T Complexity science: The challenge of complexity in health care. *BMJ*, 2001. 323, 625-8.
6. Stacey, RD. The science of complexity: An alternative perspective for strategic change processes. *Strategic Management Journal*, 1995; 16(6): 477-495.
7. Braithwaite, J, Churruca, K, and Ellis, LA. Can we fix the uber-complexities of healthcare? *Journal of the Royal Society of Medicine*, 2017: 0141076817728419. DOI: 10.1177/0141076817728419.
8. Braithwaite, J, Churruca, K, Ellis, LA, et al., Complexity Science in Healthcare – Aspirations, Approaches, Applications and Accomplishments: A White Paper. 2017, Australian Institute of Health Innovation, Macquarie University: Macquarie University, Sydney, Australia.
9. Wilson, T, Holt, T, and Greenhalgh, T. Complexity science: Complexity and clinical care. *BMJ*, 2001; 323(7314): 685-8.
10. Fraser, SW and Greenhalgh, T. Complexity science - Coping with complexity: educating for capability. *BMJ*, 2001; 323(7316): 799-803. DOI: 10.1136/bmj.323.7316.799.
11. McDaniel, RR and Driebe, DJ. Complexity science and health care management, in *Advances in Health Care Management*, L.H. Friedman, J. Goes, and G.T. Savage, Editors. Emerald Group Publishing Limited: Bingley, UK, 2001.
12. Plsek, PE and Wilson, T. Complexity science - Complexity, leadership, and management in healthcare organisations. *BMJ*, 2001; 323(7315): 746-749. DOI: 10.1136/bmj.323.7315.746.
13. Provost, SM, Lanham, HJ, Leykum, LK, et al. Health care huddles: Managing complexity to achieve high reliability. *Health Care Management Review*, 2015; 40(1): 2-12. DOI: 10.1097/HMR.000000000000009.
14. Cooper, HC and Geyer, R. What can complexity do for diabetes management? Linking theory to practice. *Journal of Evaluation in Clinical Practice*, 2009; 15(4): 761-5. DOI: 10.1111/j.1365-2753.2009.01229.x.
15. Braithwaite, J, Churruca, K, Long, JC, et al. When complexity science meets implementation science: a theoretical and empirical analysis of systems change. *BMC Medicine*, 2018; 16(1): 63. DOI: 10.1186/s12916-018-1057-z.
16. Zimmerman, B. Complexity science: a route through hard times and uncertainty. *Health Forum journal*, 1999; 42(2): 42-69.
17. Anderson, RA and McDaniel, RR. RN participation in organizational decision making and improvements in resident outcomes. *Health Care Management Review*, 1999; 24(1): 7-16. DOI: 10.1097/00004010-199901000-00002.
18. Barasa, EW, Molyneux, S, English, M, et al. Hospitals as complex adaptive systems: A case study of factors influencing priority setting practices at the hospital level in Kenya. *Social science & medicine (1982)*, 2017; 174: 104-112. DOI: 10.1016/j.socscimed.2016.12.026.

19. Thompson, DS, Fazio, X, Kustra, E, et al. Scoping review of complexity theory in health services research. *BMC Health Services Research*, 2016; 16(1): 1-16. DOI: 10.1186/s12913-016-1343-4.
20. Brainard, J and Hunter, PR. Do complexity-informed health interventions work? A scoping review. *Implementation Science*, 2016; 11(1): 127. DOI: 10.1186/s13012-016-0492-5.
21. Rusoja, E, Haynie, D, Sievers, J, et al. Thinking about complexity in health: A systematic review of the key systems thinking and complexity ideas in health. *Journal of Evaluation in Clinical Practice*, 2018 DOI: 10.1111/jep.12856.
22. Cook, RI and Ekstedt, M. Reflections on resilience: Repertoires and system features, in *Resilient Health Care: Reconciling Work-as-Imagined and Work-as-Done*, J. Braithwaite, R.L. Wears, and E. Hollnagel, Editors. CRC Press, Taylor & Francis Group: Boca Raton, FL, USA, 2017.
23. Kottke, TE, Huebsch, JA, McGinnis, P, et al. Using Principles of Complex Adaptive Systems to Implement Secondary Prevention of Coronary Heart Disease in Primary Care. *The Permanente Journal*, 2016; 20(2): 17-24. DOI: 10.7812/TPP/15-100.
24. Wasserman, S and Faust, K. *Social network analysis: Methods and applications*: Cambridge university press, 1994.
25. Sturmberg, JP, Martin, CM, and Katerndahl, DA. Systems and Complexity Thinking in the General Practice Literature: An Integrative, Historical Narrative Review. *The Annals of Family Medicine*, 2014; 12(1): 66-74. DOI: 10.1370/afm.1593.
26. Lorthios-Guilledroit, A, Richard, L, and Filiatrault, J. Factors associated with the implementation of community-based peer-led health promotion programs: A scoping review. *Evaluation and Program Planning*, 2018; 68: 19-33. DOI: <https://doi.org/10.1016/j.evalprogplan.2018.01.008>.
27. Best, A, Greenhalgh, T, Lewis, S, et al. Large-system transformation in health care: A realist review. *Milbank Quarterly*, 2012; 90: 421–456. DOI: 10.1111/j.1468-0009.2012.00670.x.
28. Goldberger, AL. Non-linear dynamics for clinicians: Chaos theory, fractals, and complexity at the bedside. *Lancet*, 1996; 347(9011): 1312-1314. DOI: 10.1016/s0140-6736(96)90948-4.
29. Sargeant, J. Theories to aid understanding and implementation of interprofessional education. *Journal of Continuing Education in the Health Professions*, 2009; 29(3): 178-184. DOI: 10.1002/chp.20033.
30. Anderson, RA, Issel, LM, and McDaniel, RR. Nursing Homes as Complex Adaptive Systems: Relationship between Management Practice and Resident Outcomes. *Nursing Research*, 2003; 52(1): 12-21.
31. O'Sullivan, TL, Kuziemy, CE, Toal-Sullivan, D, et al. Unraveling the complexities of disaster management: A framework for critical social infrastructure to promote population health and resilience. *Social Science & Medicine*, 2013; 93: 238-246. DOI: <https://doi.org/10.1016/j.socscimed.2012.07.040>.
32. Hanseth, O, Jacucci, E, Grisot, M, et al. Reflexive Standardization: Side Effects and Complexity in Standard Making. *MIS Quarterly*, 2006; 30: 563-581. DOI: 10.2307/25148773.
33. Monrouxe, LV, Rees, CE, and Hu, W. Differences in medical students' explicit discourses of professionalism: acting, representing, becoming. *Medical Education*, 2011; 45(6): 585-602. DOI: 10.1111/j.1365-2923.2010.03878.x.
34. Oyeleye, O, Hanson, P, O'Connor, N, et al. Relationship of Workplace Incivility, Stress, and Burnout on Nurses' Turnover Intentions and Psychological Empowerment. *Journal*



- 1  
2 of Nursing Administration, 2013; 43(10): 536-542. DOI:  
3 10.1097/NNA.0b013e3182a3e8c9.
- 4 35. Goldberger, AL. Non-linear dynamics for clinicians: chaos theory, fractals, and  
5 complexity at the bedside. *The Lancet*, 1996; 347(9011): 1312-1314. DOI:  
6 [https://doi.org/10.1016/S0140-6736\(96\)90948-4](https://doi.org/10.1016/S0140-6736(96)90948-4).
- 7 36. Anderson, RA, Corazzini, KN, and McDaniel, JRR. Complexity Science and the  
8 Dynamics of Climate and Communication: Reducing Nursing Home Turnover. *The*  
9 *Gerontologist*, 2004; 44(3): 378-388. DOI: 10.1093/geront/44.3.378.
- 10 37. Braa, J, Hanseth, O, Heywood, A, et al. Developing Health Information Systems in  
11 Developing Countries: The Flexible Standards Strategy. *MIS Quarterly*, 2007; 31(2):  
12 381-402. DOI: 10.2307/25148796.
- 13 38. Ssengooba, F, McPake, B, and Palmer, N. Why performance-based contracting failed  
14 in Uganda – An “open-box” evaluation of a complex health system intervention. *Social*  
15 *Science & Medicine*, 2012; 75(2): 377-383. DOI:  
16 <https://doi.org/10.1016/j.socscimed.2012.02.050>.
- 17 39. Miller, WL, McDaniel, RR, Crabtree, BF, et al. Practice jazz: understanding variation in  
18 family practices using complexity science. *The Journal of Family Practice*, 2001.
- 19 40. Frye, AW and Hemmer, PA. Program evaluation models and related theories: AMEE  
20 Guide No. 67. *Medical Teacher*, 2012; 34(5): e288-e299. DOI:  
21 10.3109/0142159X.2012.668637.
- 22 41. Boustani, MA, Sachs, GA, Alder, CA, et al. Implementing innovative models of  
23 dementia care: The Healthy Aging Brain Center. *Aging and Mental Health*, 2011; 15(1):  
24 13-22. DOI: 10.1080/13607863.2010.496445.
- 25 42. Bleakley, A. Broadening conceptions of learning in medical education: the message  
26 from teamworking. *Medical Education*, 2006; 40(2): 150-157. DOI: 10.1111/j.1365-  
27 2929.2005.02371.x.
- 28 43. Anderson, RA, Crabtree, BF, Steele, DJ, et al. Case Study Research: The View From  
29 Complexity Science. *Qualitative Health Research*, 2005; 15(5): 669-685. DOI:  
30 10.1177/1049732305275208.
- 31 44. Plsek, P. Appendix B: Redesigning health care with insights from the science of  
32 complex adaptive systems, in *Crossing the quality chasm: A new health system for the*  
33 *21st century*, Institute of Medicine, Editor., 2001.
- 34 45. Zimmerman, B, Lindberg, C, and Plsek, PE. *Edgware: Insights from complexity*  
35 *science for health care leaders*. Irving, TX: VHA Publishing, 1998.
- 36 46. Eccles, MP and Mittman, BS. Welcome to Implementation Science. *Implementation*  
37 *Science*, 2006; 1(1): 1. DOI: 10.1186/1748-5908-1-1.
- 38 47. Thomson Reuters, Whitepaper - Using Bibliometrics: A guide to evaluating research  
39 performance with citation data. 2008.
- 40 48. De Bellis, N. *Bibliometrics and citation analysis: from the science citation index to*  
41 *cybermetrics*. Lanham, MD: The Scarecrow Press, 2009.
- 42 49. Eysenbach, G. Can Tweets Predict Citations? Metrics of Social Impact Based on  
43 Twitter and Correlation with Traditional Metrics of Scientific Impact. *Journal of Medical*  
44 *Internet Research*, 2011; 13(4): e123. DOI: 10.2196/jmir.2012.
- 45 50. Leykum, LK, Lanham, HJ, Pugh, JA, et al. Manifestations and implications of  
46 uncertainty for improving healthcare systems: an analysis of observational and  
47 interventional studies grounded in complexity science. *Implementation Science*, 2014;  
48 9: 165. DOI: 10.1186/s13012-014-0165-1.
- 49 51. Lanham, HJ, Leykum, LK, Taylor, BS, et al. How complexity science can inform scale-  
50 up and spread in health care: Understanding the role of self-organization in variation  
51  
52  
53  
54  
55  
56  
57  
58  
59



- 1  
2 across local contexts. *Social Science & Medicine*, 2013; 93: 194-202. DOI:  
3 10.1016/j.socscimed.2012.05.040.
- 4 52. Barbaro, A, Gentili, D, and Rebuffi, C. Altmetrics as new indicators of scientific impact.  
5 *Journal of the European Association for Health Information and Libraries*, 2014; 10(1):  
6 3-6.
- 7 53. Hawe, P. Lessons from complex interventions to improve health. *Annual Review of*  
8 *Public Health*, 2015; 36: 307-323. DOI: 10.1146/annurev-publhealth-031912-114421.
- 9 54. Sterman, JD. Learning from evidence in a complex world. *Am J Public Health*, 2006;  
10 96(3): 505-514. DOI: 10.2105/ajph.2005.066043.  
11  
12  
13  
14  
15  
16  
17  
18  
19  
20  
21  
22  
23  
24  
25  
26  
27  
28  
29  
30  
31  
32  
33  
34  
35  
36  
37  
38  
39  
40  
41  
42  
43  
44  
45  
46  
47  
48  
49  
50  
51  
52  
53  
54  
55  
56  
57  
58  
59  
60

For peer review only

## FIGURE LEGENDS

**Figure 1. PRISMA flow diagram of search strategy**

**Figure 2. Global trends for publishing articles on complexity science applied to healthcare.**

**Figure 3. Trends over time in the types of articles published on complexity science applied to healthcare.**

Note data collected mid-2018.

**Figure 4. Trend over time in the publications of complexity science applied to healthcare by topic theme.**

**Figure 5. Sociogram of index references for complexity science applied to healthcare.**

Each circle (node) is representative of a research output. The size of node is indicative of in-degree (larger nodes indicate a higher number of references towards the output as an index). Colour of node is indicative of the topic theme. \* indicates equal levels of in-degree for corresponding rank.

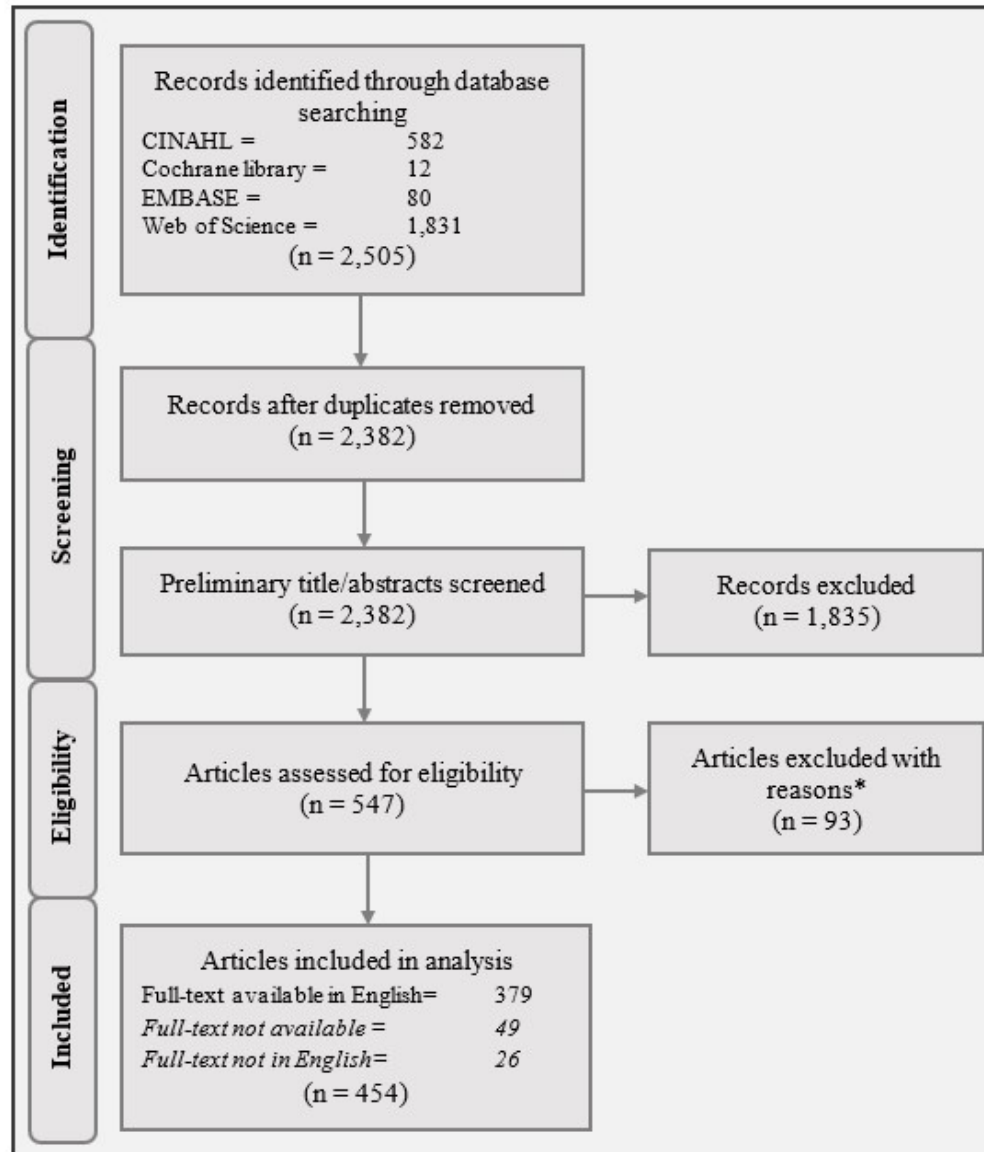

Figure 1. PRISMA flow diagram of search strategy

143x167mm (96 x 96 DPI)

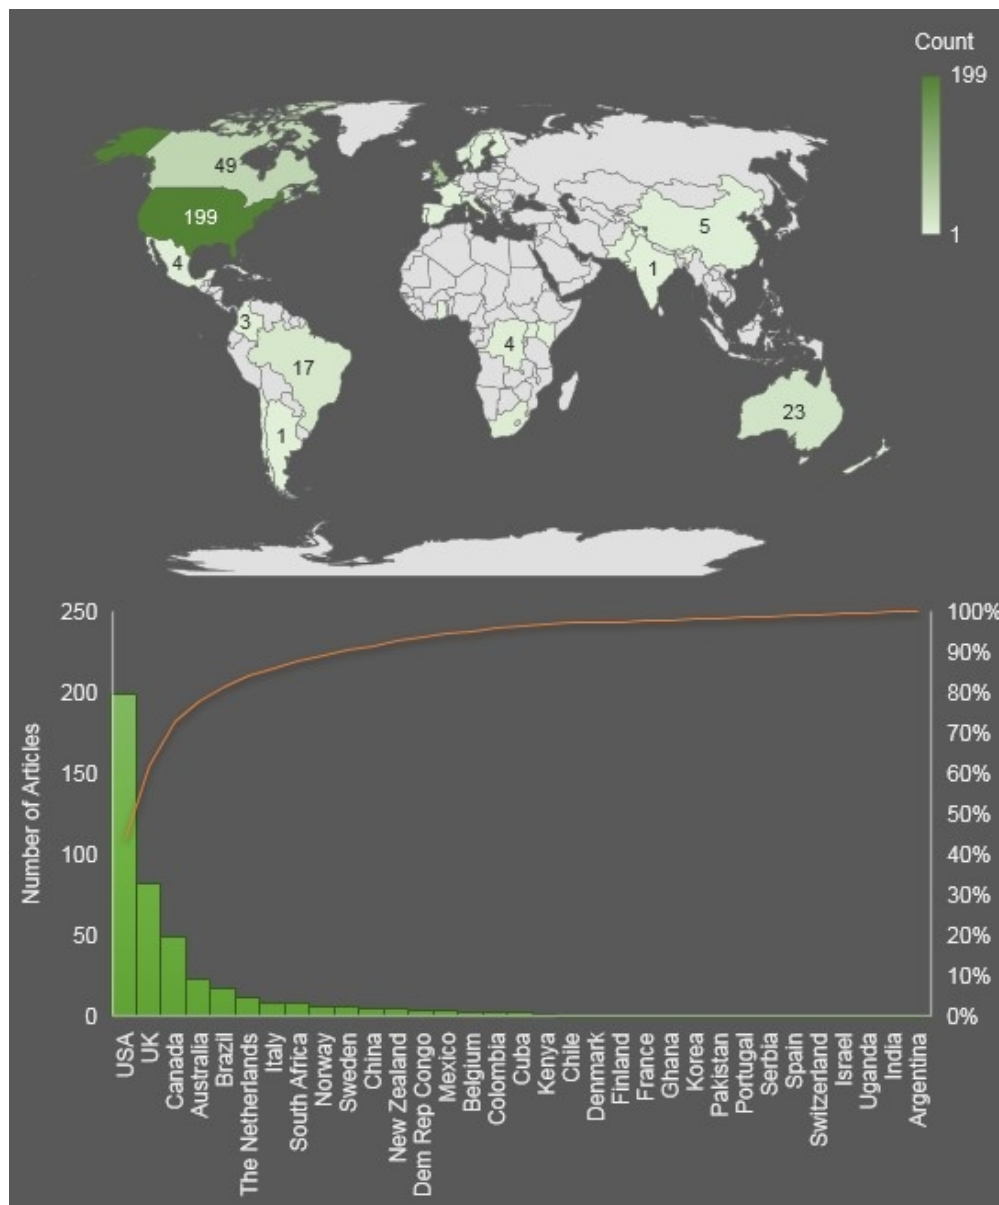

Figure 2. Global trends for publishing articles on complexity science applied to healthcare.

144x172mm (96 x 96 DPI)

1  
2  
3  
4  
5  
6  
7  
8  
9  
10  
11  
12  
13  
14  
15  
16  
17  
18  
19  
20  
21  
22  
23  
24  
25  
26  
27  
28  
29  
30  
31  
32  
33  
34  
35  
36  
37  
38  
39  
40  
41  
42  
43  
44  
45  
46  
47  
48  
49  
50  
51  
52  
53  
54  
55  
56  
57  
58  
59  
60

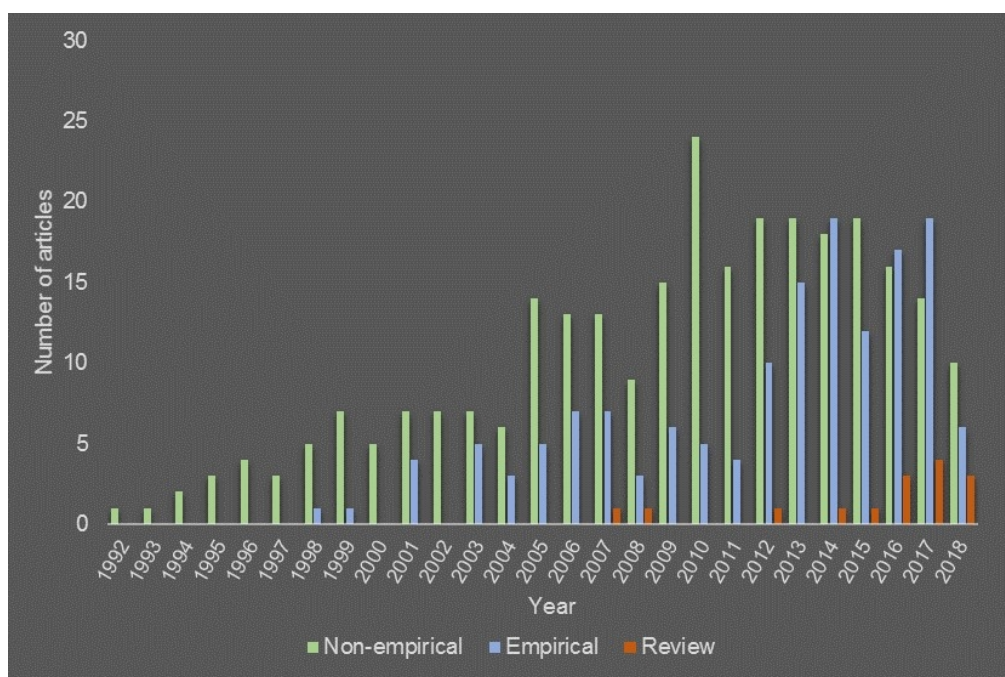

Figure 3. Trends over time in the types of articles published on complexity science applied to healthcare. Note data collected mid-2018.

139x93mm (150 x 150 DPI)

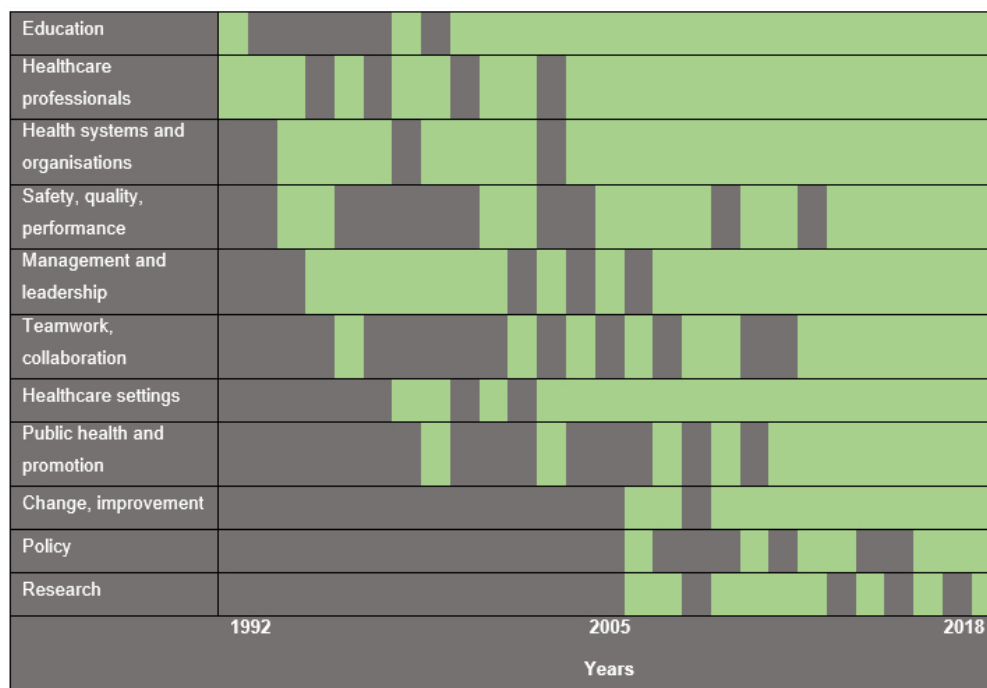

Figure 4. Trend over time in the publications of complexity science applied to healthcare by topic theme.

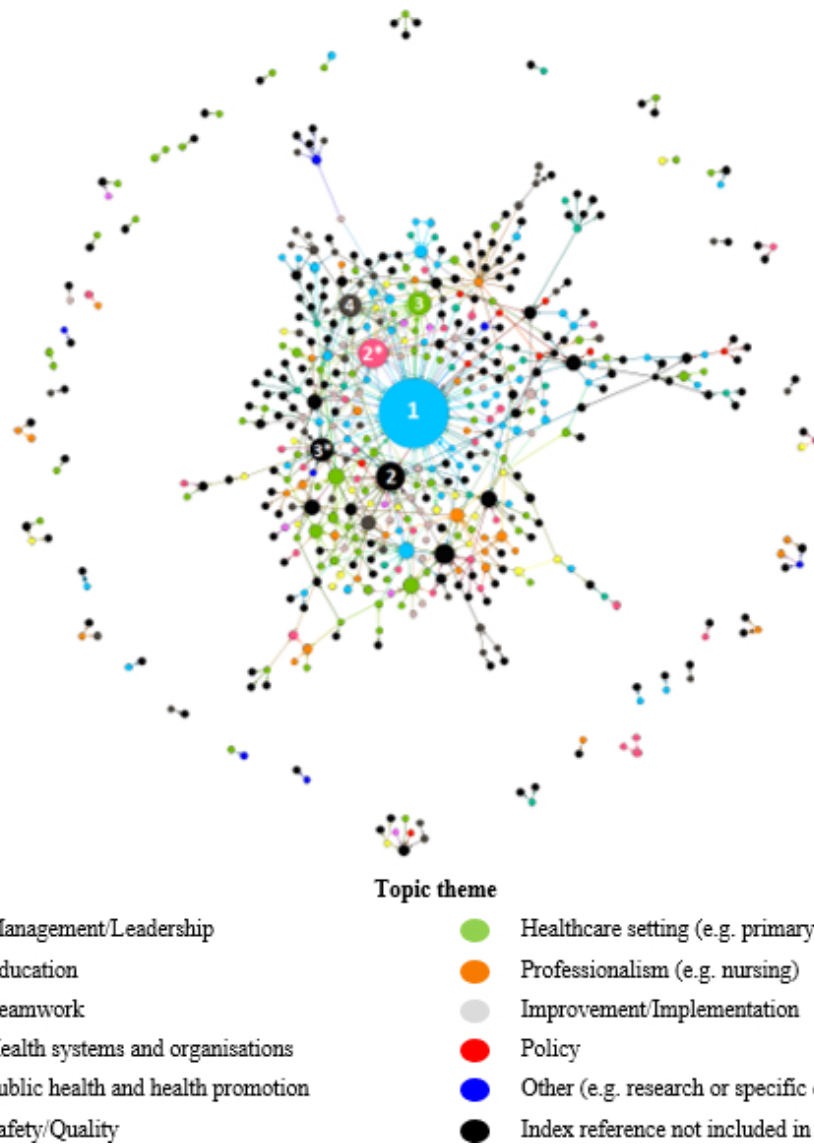

43  
44  
45  
46  
47  
48  
49  
50  
51  
52  
53  
54  
55  
56  
57  
58  
59  
60

Figure 5. Sociogram of index references for complexity science applied to healthcare. Each circle (node) is representative of a research output. The size of node is indicative of in-degree (larger nodes indicate a higher number of references towards the output as an index). Colour of node is indicative of the topic theme. \* indicates equal levels of in-degree for corresponding rank.

## Appendix 1.

| Source                                                                                                        | Average citations per year | Country of corresponding author | Journal                                                                        | Empirical     | Healthcare context                                                      |
|---------------------------------------------------------------------------------------------------------------|----------------------------|---------------------------------|--------------------------------------------------------------------------------|---------------|-------------------------------------------------------------------------|
| Abbott, P. A., J. Foster, H. d. F. Marin and P. C. Dykes (2014)                                               | 10.75                      | USA                             | International journal of medical informatics                                   | Empirical     | IT implementation                                                       |
| Afek, A., A. Meilik and Z. Rotstein (2009)                                                                    | 0.22                       | Israel                          | Harefuah                                                                       | Non-empirical | Management                                                              |
| Agyepong, I. A., A. Kodua, S. Adjei and T. Adam (2012)                                                        | 8.83                       | Ghana                           | Health policy and planning                                                     | Empirical     | Health system - policy                                                  |
| Aherne, M. and J. Pereira (2005)                                                                              | 1.17                       | Canada                          | Leadership in health services                                                  | Non-empirical | Health care policy - palliative care                                    |
| Aita, V., H. McIlvain, E. Backer, K. McVea and B. Crabtree (2005)                                             | 5.92                       | USA                             | Patient education and counseling                                               | Empirical     | Primary care - patient-practitioner communication                       |
| Albanese, M., G. Mejicano, G. Xakellis and P. Kokotailo (2009)                                                | 2.11                       | USA                             | Academic medicine                                                              | Non-empirical | Health care systems                                                     |
| Allred, C. A., B. J. Burns and S. D. Phillips (2005)                                                          | 1.69                       | USA                             | Administration and policy in mental health and mental health services research | Non-empirical | Community mental health care - assertive community treatment            |
| Anderson, C. A. and A. L. Whall (2011)                                                                        | 0.71                       | USA                             | Journal of advanced nursing                                                    | Non-empirical | Nursing - research - agent based modelling                              |
| Anderson, R. A. and R. R. McDaniel (1999)                                                                     | 5.68                       | USA                             | Health care management review                                                  | Empirical     | Nursing home - nursing - decision making                                |
| Anderson, R. A. and R. R. McDaniel Jr (2000)                                                                  | 18.33                      | USA                             | Health care management review                                                  | Non-empirical | Leadership and professionalism                                          |
| Anderson, R. A., B. E. Crabtree, D. J. Steele and R. R. McDaniel (2005)                                       | 25.08                      | USA                             | Qualitative health research                                                    | Non-empirical | Health care organisations                                               |
| Anderson, R. A., C. A. Allred and F. A. Sloan (2003)                                                          | 1.47                       | USA                             | Health care management review                                                  | Empirical     | Hospital - management practice changes in light of ownership conversion |
| Anderson, R. A., D. E. Bailey, B. Wu, K. Corazzini, E. S. McConnell, N. M. Thygeson and S. L. Docherty (2015) | 5.67                       | USA                             | Advances in nursing science                                                    | Non-empirical | Leadership – chronic illness                                            |
| Anderson, R. A., K. Corazzini, K. Porter, K. Daily, R. R. McDaniel and C. Colon-Emeric (2012)                 | 7.33                       | USA                             | Implementation science                                                         | Non-empirical | Nursing homes                                                           |
| Anderson, R. A., K. N. Corazzini and R. R. McDaniel Jr (2004)                                                 | 15.93                      | USA                             | The gerontologist                                                              | Empirical     | Nursing homes - job satisfaction                                        |



|                                                                                                                                       |       |                |                                            |               |                                             |
|---------------------------------------------------------------------------------------------------------------------------------------|-------|----------------|--------------------------------------------|---------------|---------------------------------------------|
| Anderson, R. A., L. M. Issel and R. R. McDaniel (2003)                                                                                | 29.40 | USA            | Nursing research                           | Empirical     | Nursing home                                |
| Anthony, M. K., J. Kloos, P. Beam and K. Vidal (2018)                                                                                 | 0     | USA            | Journal of nursing care                    | Non-empirical | Hospital - nursing hand-off                 |
| Arndt, M. and B. Bigelow (2000)                                                                                                       | 4.11  | USA            | Health care management review              | Non-empirical | Management                                  |
| Arruda, C., S. G. R. Lopes, M. H. A. d. L. Koerich, D. R. Winck, B. H. S. Meirelles and A. L. S. F. d. Mello (2015)                   | 2.00  | Brazil         | Escola anna nery                           | Non-empirical | Health care networks                        |
| Ashmos, D. P., J. W. Huonker and R. R. McDaniel (1998)                                                                                | 5.15  | USA            | Health care management review              | Empirical     | Hospital – leadership                       |
| Atun, R. A., I. Kyratsis, G. Jelic, D. Rados-Malicbegovic and I. Gurol-Urganci (2007)                                                 | 7.73  | United Kingdom | Health policy and planning                 | Empirical     | Primary care – reform                       |
| Augustinsson, S. and P. Petersson (2015)                                                                                              | 1.67  | Sweden         | Journal of research in nursing             | Empirical     | Hospital - nursing - discharge planning     |
| Baghbanian, A. and G. Torkfar (2012)                                                                                                  | 1.33  | Australia      | Australian health review                   | Non-empirical | Health system - economics and policy        |
| Bailey, D. E., S. L. Docherty, J. A. Adams, D. L. Carthron, K. Corazzini, J. R. Day, E. Neglia, M. Thygeson and R. A. Anderson (2012) | 5.00  | USA            | Journal of healthcare leadership           | Non-empirical | Leadership                                  |
| Barasa, E. W., S. Molyneux, M. English and S. Cleary (2017)                                                                           | 12.00 | Kenya          | Social science & medicine                  | Empirical     | Hospitals - priority setting                |
| Baskin, K., J. Goldstein and C. Lindberg (2000)                                                                                       | 0.89  | USA            | Physician executive                        | Non-empirical | Mergers                                     |
| Beautement, P. and C. Broenner (2012)                                                                                                 | 0.29  | United Kingdom | Journal of evaluation in clinical practice | Non-empirical | Health care practice                        |
| Bebber, R. and A. Liberman (2008)                                                                                                     | 0.20  | USA            | International journal of public policy     | Non-empirical | Hospital – bioterrorism                     |
| Bedin, D. M., H. B. Kochenborger Scarparo, H. A. Martinez and I. B. Matos (2014)                                                      | 0     | Brazil         | Saude e sociedade                          | Non-empirical | Management                                  |
| Begun, J. W. and A. A. Kaissi (2005)                                                                                                  | 3.15  | USA            | Journal of healthcare management           | Empirical     | Healthcare planning - leadership/management |
| Bell, I. R., M. Koithan and D. Pincus (2012)                                                                                          | 6.67  | USA            | Forschende komplementarmedizin             | Non-empirical | Complementary medicine                      |
| Bennett, C. (2003)                                                                                                                    | 0.13  | Canada         | Healthcare papers                          | Non-empirical | Health care system – hospital               |

|                                                                                                                                                                                                         |       |                |                                                               |               |                                                    |
|---------------------------------------------------------------------------------------------------------------------------------------------------------------------------------------------------------|-------|----------------|---------------------------------------------------------------|---------------|----------------------------------------------------|
| Best, A., T. Greenhalgh, S. Lewis, J. E. Saul, S. Carroll and J. Bitz (2012)                                                                                                                            | 40.67 | Canada         | The milbank quarterly                                         | Review        | Health care system – transformation                |
| Betancourt Betancourt, J. A. and R. M. Ramis Andalia (2010)                                                                                                                                             | 1.50  | Cuba           | Revista cubana de salud pública                               | Non-empirical | Health and healthcare generally                    |
| Betancourt Bethencourt, J. A., F. Martínez Álvarez, M. Álvarez Escoda and E. Nicolau Pestano (2016)                                                                                                     | 0     | Cuba           | Humanidades médicas                                           | Non-empirical | Education                                          |
| Betancourt Bethencourt, J. A., R. M. Ramis Andalia and M. Mirabal Nápoles (2014)                                                                                                                        | 2.25  | Cuba           | Revista cubana de salud pública                               | Non-empirical | Primary care – translation                         |
| Bircher, J. and E. G. Hahn (2017)                                                                                                                                                                       | 3.00  | Switzerland    | Cureus                                                        | Non-empirical | Health and healthcare generally                    |
| Bleakley, A. (2006)                                                                                                                                                                                     | 25.60 | United Kingdom | Medical education                                             | Non-empirical | Education                                          |
| Bleakley, A. (2006)a                                                                                                                                                                                    | 4.33  | United Kingdom | Journal of medicine and philosophy                            | Non-empirical | Hospital - operating theatre, teamwork             |
| Bleakley, A. (2010)                                                                                                                                                                                     | 9.38  | United Kingdom | Journal of evaluation in clinical practice                    | Non-empirical | Education                                          |
| Bloom, L. A. and B. S. Bloom (1999)                                                                                                                                                                     | 0.316 | USA            | International journal of technology assessment in health care | Non-empirical | Decision making                                    |
| Bogren, M. U., M. Berg, L. Edgren, E. van Teijlingen and H. Wigert (2016)                                                                                                                               | 1.50  | Sweden         | Sexual and reproductive healthcare                            | Empirical     | Professionalism – midwifery                        |
| Boustani, M. A., A. Frame, S. Munger, P. Healey, J. Westlund, M. Farlow, A. Hake, M. G. Austrom, P. Shepard, C. Bubp, J. Azar, A. Nazir, N. Adams, N. L. Campbell, A. Chehresa and P. Dexter (2012)     | 1.33  | USA            | Clinical interventions in aging                               | Empirical     | Professional network - dementia care – improvement |
| Boustani, M. A., G. A. Sachs, C. A. Alder, S. Munger, C. C. Schubert, M. Guerriero Austrom, A. M. Hake, F. W. Unverzagt, M. Farlow, B. R. Matthews, A. J. Perkins, R. A. Beck and C. M. Callahan (2011) | 14.50 | USA            | Aging & mental health                                         | Empirical     | Primary care - dementia care                       |
| Boustani, M. A., S. Munger, R. Gulati, M. Vogel, R. A. Beck and C. M. Callahan (2010)                                                                                                                   | 5.63  | USA            | Clinical interventions in aging                               | Non-empirical | Implementation and system change                   |
| Boustani, M., C. Schubert and Y. Sennour (2007)                                                                                                                                                         | 3.55  | USA            | Clinical interventions in aging                               | Non-empirical | Primary health care - dementia                     |

|    |                                                                                                                                                              |       |                |                                                          |               |                                                            |
|----|--------------------------------------------------------------------------------------------------------------------------------------------------------------|-------|----------------|----------------------------------------------------------|---------------|------------------------------------------------------------|
| 1  |                                                                                                                                                              |       |                |                                                          |               |                                                            |
| 2  |                                                                                                                                                              |       |                |                                                          |               |                                                            |
| 3  |                                                                                                                                                              |       |                |                                                          |               |                                                            |
| 4  | Braa, J., O. Hanseth, A. Heywood, W. Mohammed and V. Shaw (2007)                                                                                             | 35.64 | Norway         | Mis quarterly                                            | Non-empirical | Information systems implementation in developing countries |
| 5  |                                                                                                                                                              |       |                |                                                          |               |                                                            |
| 6  | Bradley, E. H., L. A. Curry, L. A. Taylor, S. W. Pallas, K. Talbert-Slagle, C. Yuan, A. Fox, D. Minhas, D. K. Ciccone, D. Berg and R. Perez-Escamilla (2012) | 5.17  | USA            | Bmj open                                                 | Empirical     | Community/ family health -LMIC                             |
| 7  |                                                                                                                                                              |       |                |                                                          |               |                                                            |
| 8  |                                                                                                                                                              |       |                |                                                          |               |                                                            |
| 9  |                                                                                                                                                              |       |                |                                                          |               |                                                            |
| 10 |                                                                                                                                                              |       |                |                                                          |               |                                                            |
| 11 | Brainard, J. and P. R. Hunter (2016)                                                                                                                         | 7.50  | United Kingdom | Implementation science                                   | Review        | Research -diverse                                          |
| 12 |                                                                                                                                                              |       |                |                                                          |               |                                                            |
| 13 | Brand, S. L., L. E. Fleming and K. M. Wyatt (2015)                                                                                                           | 0.33  | United Kingdom | The scientific world journal                             | Non-empirical | Health care organisations - workplace wellbeing            |
| 14 |                                                                                                                                                              |       |                |                                                          |               |                                                            |
| 15 | Brannon, S. D., P. Kemper and T. Barry (2009)                                                                                                                | 1.00  | USA            | Health care management review                            | Empirical     | Management - health organisations                          |
| 16 |                                                                                                                                                              |       |                |                                                          |               |                                                            |
| 17 | Brennan, C. (2016)                                                                                                                                           | 0     | USA            | Plastic surgical nursing                                 | Non-empirical | Leadership                                                 |
| 18 |                                                                                                                                                              |       |                |                                                          |               |                                                            |
| 19 | Breton, J. J. (1999)                                                                                                                                         | 0.37  | Canada         | Canadian journal of psychiatry                           | Non-empirical | Mental health - health promotion                           |
| 20 |                                                                                                                                                              |       |                |                                                          |               |                                                            |
| 21 | Bro, F. and J. Kragstrup (2003)                                                                                                                              | 0.20  | Denmark        | Scandinavian journal of primary health care              | Non-empirical | Primary health care                                        |
| 22 |                                                                                                                                                              |       |                |                                                          |               |                                                            |
| 23 | Brooks, E. and R. Geyer (2012)                                                                                                                               | 1.00  | United Kingdom | Journal of evaluation in clinical practice               | Non-empirical | Health system policy - drug advertising to consumers       |
| 24 |                                                                                                                                                              |       |                |                                                          |               |                                                            |
| 25 | Brown, C. A. (2006)                                                                                                                                          | 4.50  | United Kingdom | Disability and rehabilitation                            | Non-empirical | Rehabilitation - professionalism                           |
| 26 |                                                                                                                                                              |       |                |                                                          |               |                                                            |
| 27 | Brown, C. A. and C. Richardson (2006)                                                                                                                        | 3.67  | United Kingdom | European journal of pain                                 | Empirical     | MDT – pain                                                 |
| 28 |                                                                                                                                                              |       |                |                                                          |               |                                                            |
| 29 | Browne, A. J., C. Varcoe, M. Ford-Gilboe, C. N. Wathen and E. R. Team (2015)                                                                                 | 5.33  | Canada         | International journal for equity in health               | Non-empirical | Primary care – equity                                      |
| 30 |                                                                                                                                                              |       |                |                                                          |               |                                                            |
| 31 | Bujak, J. S. (1999)                                                                                                                                          | 0.63  | USA            | Physician executive                                      | Non-empirical | Leadership - culture - medicine                            |
| 32 |                                                                                                                                                              |       |                |                                                          |               |                                                            |
| 33 | Bujak, J. S. (2003)                                                                                                                                          | 2.47  | USA            | Frontiers of health service management                   | Non-empirical | Leadership                                                 |
| 34 |                                                                                                                                                              |       |                |                                                          |               |                                                            |
| 35 | Bullas, S. and J. Bryant (2007)                                                                                                                              | 0.82  | United Kingdom | Studies in health information technology and informatics | Non-empirical | IT implementation                                          |
| 36 |                                                                                                                                                              |       |                |                                                          |               |                                                            |
| 37 | Bungay, V. and J. Stevenson (2013)                                                                                                                           | 0.40  | Canada         | Policy, politics, & nursing practice                     | Empirical     | Nurse leaders - reform                                     |
| 38 |                                                                                                                                                              |       |                |                                                          |               |                                                            |
| 39 | Burke, J. P. and S. L. Pestotnik (1999)                                                                                                                      | 0.74  | USA            | Current opinion in infectious diseases                   | Non-empirical | Resistance                                                 |
| 40 |                                                                                                                                                              |       |                |                                                          |               |                                                            |
| 41 |                                                                                                                                                              |       |                |                                                          |               |                                                            |
| 42 |                                                                                                                                                              |       |                |                                                          |               |                                                            |
| 43 |                                                                                                                                                              |       |                |                                                          |               |                                                            |
| 44 |                                                                                                                                                              |       |                |                                                          |               |                                                            |
| 45 |                                                                                                                                                              |       |                |                                                          |               |                                                            |
| 46 |                                                                                                                                                              |       |                |                                                          |               |                                                            |
| 47 |                                                                                                                                                              |       |                |                                                          |               |                                                            |

|                                                                                                                                     |       |                |                                                    |               |                                                          |
|-------------------------------------------------------------------------------------------------------------------------------------|-------|----------------|----------------------------------------------------|---------------|----------------------------------------------------------|
| Burman, C. J., M. Aphane and P. Delobelle (2015)                                                                                    | 3.33  | South Africa   | African journal of aids research                   | Non-empirical | Public health and health promotion - AIDS                |
| Burman, C. J., M. Aphane, O. Mtapuri and P. Delobelle (2015)                                                                        | 2.33  | South Africa   | Sahara-j: journal of social aspects of hiv/aids    | Non-empirical | Health promotion - HIV prevention                        |
| Burns, J. P. (2001)                                                                                                                 | 4.18  | USA            | Journal of nursing administration                  | Non-empirical | Leadership                                               |
| Butt, G., M. Markle-Reid and G. Browne (2008)                                                                                       | 5.80  | Canada         | International journal of integrated care           | Review        | Integrated care - health and social service partnership  |
| Buttigieg, S. C., V. Cassar and J. W. Scully (2013)                                                                                 | 1.20  | United Kingdom | Journal of health organization and management      | Empirical     | Hospital, leadership, integrated care                    |
| Caffrey, L., C. Wolfe and C. McKeivitt (2016)                                                                                       | 4.00  | United Kingdom | Health research policy and systems                 | Empirical     | Health system - implementation and working with research |
| Callahan, C. M., M. A. Boustani, M. Weiner, R. A. Beck, L. R. Livin, J. J. Kellams, D. R. Willis and H. C. Hendrie (2011)           | 9.13  | USA            | Aging & mental health                              | Non-empirical | Primary care - dementia                                  |
| Canals L, M. and R. Solís (2005)                                                                                                    | 0.85  | Chile          | Revista médica de chile                            | Non-empirical | Medicine                                                 |
| Carlos, D. M., E. M. M. de Padua, L. M. P. da Silva, M. A. I. Silva, W. E. U. Marques, M. N. D. Leitao and M. D. C. Ferriani (2017) | 1.00  | Brazil         | Journal of clinical nursing                        | Empirical     | Primary health care - family violence                    |
| Carney, T. J. and C. M. Shea (2017)                                                                                                 | 4.00  | USA            | Computational and mathematical methods in medicine | Non-empirical | Public health - informatics                              |
| Chadwick, M. M. (2010)                                                                                                              | 3.88  | USA            | Aorn journal                                       | Non-empirical | Leadership - nursing                                     |
| Chaffee, M. W. and M. M. McNeill (2007)                                                                                             | 8.64  | USA            | Nursing outlook                                    | Non-empirical | Nursing                                                  |
| Chan, M. K., D. D. Meschino, D. Dath, J. Busari, J. D. Bohnen, L. M. Samson, A. Matlow and M. Sanchez-Mendiola (2016)               | 5.50  | Canada         | Leadership in health services                      | Non-empirical | Education - medical - leadership                         |
| Chandler, J., J. Rycroft-Malone, C. Hawkes and J. Noyes (2016)                                                                      | 10.67 | United Kingdom | Journal of advanced nursing                        | Empirical     | Health system - improvement and implementation           |
| Checkland, K., I. McDermott, A. Coleman, L. Warwick-Giles, D. Bramwell, P. Allen and S. Peckham (2018)                              | 0     | United Kingdom | Public money & management                          | Empirical     | Primary care - oversight, planning, management           |
| Chen, D. T., P. H. Werhane and A. E. Mills (2007)                                                                                   | 1.73  | USA            | Critical care medicine                             | Non-empirical | Hospital - ICU/critical care medicine                    |

|                                                                                                                                                                                           |      |                |                                                  |                    |                                                          |
|-------------------------------------------------------------------------------------------------------------------------------------------------------------------------------------------|------|----------------|--------------------------------------------------|--------------------|----------------------------------------------------------|
| Chinnis, A. and K. R. White (1999)                                                                                                                                                        | 1.26 | USA            | Journal of emergency medicine                    | Non-empirical      | Hospital - emergency department                          |
| Chou, S.-M. (2004)                                                                                                                                                                        | 0.07 | China          | Hu li za zhi the journal of nursing              | Non-empirical      | Nursing                                                  |
| Christian, C. S. and N. Crisp (2012)                                                                                                                                                      | 1.00 | South Africa   | Development southern africa                      | Empirical          | Public health                                            |
| Chughtai, S. and K. Blanchet (2017)                                                                                                                                                       | 5.00 | Pakistan       | Health policy and planning                       | Review             | Public health                                            |
| Ciemins, E. L., J. Brant, D. Kersten, E. Mullette and D. Dickerson (2016)                                                                                                                 | 2.50 | USA            | Journal of palliative medicine                   | Empirical          | Palliative care - interdisciplinary team work            |
| Clancy, T. R. (2014)                                                                                                                                                                      | 1.00 | USA            | Journal of nursing administration                | Non-empirical      | Nursing - workflow                                       |
| Clancy, T. R., C. White Delaney, B. Morrison and J. K. Gunn (2006)                                                                                                                        | 3.50 | USA            | Journal of nursing administration                | Non-empirical      | Nursing - documentation                                  |
| Clarke, J. R. (2005)                                                                                                                                                                      | 1.62 | USA            | Journal of the american college of surgeons      | Non-empirical      | Hospital - surgery - patient safety                      |
| Cloninger, C. R. (2013)                                                                                                                                                                   | 3.40 | USA            | International journal of person centred medicine | Non-empirical      | Health promotion - chronic disease - person-centred care |
| Cockings, J. G., D. A. Cook and R. K. Iqbal (2006)                                                                                                                                        | 2.42 | United Kingdom | Critical care                                    | Empirical          | Hospital - quality and surveillance                      |
| Colon-Emeric, C. S., D. Lekan-Rutledge, Q. Utley-Smith, N. Ammarell, D. Bailey, M. L. Piven, K. Corazzini and R. A. Anderson (2006)                                                       | 3.25 | USA            | Health care management review                    | Empirical          | Nursing homes                                            |
| Colon-Emeric, C. S., K. Corazzini, E. S. McConnell, W. Pan, M. Toles, R. Hall, M. P. Cary, M. Batchelor-Murphy, T. Yap, A. L. Anderson, A. Burd, S. Amarasekara and R. A. Anderson (2017) | 2.00 | USA            | Jama internal medicine                           | Empirical          | Nursing homes                                            |
| Colon-Emeric, C. S., N. Ammarell, C. Bailey, C. Kirsten, D. Lekan-Rutledge, M. Piven and R. Anderson (2005)                                                                               | 0.08 | USA            | Journal of the american geriatrics society       | Unable to classify | Nursing                                                  |
| Colon-Emeric, C. S., N. Ammarell, D. Bailey, K. Corazzini, D. Lekan-Rutledge, M. L. Piven, Q. Utley-Smith and R. A. Anderson (2006)                                                       | 6.58 | USA            | Qualitative health research                      | Empirical          | Nursing home - communication between medicine-nursing    |
| Cooper, A. and B. Wren (2012)                                                                                                                                                             | 1.33 | United Kingdom | Psychoanalytic psychotherapy                     | Non-empirical      | Mental health                                            |

|                                                                                                                                          |       |                |                                                |                    |                                                                 |
|------------------------------------------------------------------------------------------------------------------------------------------|-------|----------------|------------------------------------------------|--------------------|-----------------------------------------------------------------|
| Cooper, H. and E. Spencer-Dawe (2006)                                                                                                    | 7.75  | United Kingdom | Journal of integrated care                     | Empirical          | Education - interprofessional                                   |
| Cooper, H. and R. Geyer (2008)                                                                                                           | 3.30  | United Kingdom | Social science & medicine                      | Non-empirical      | Education                                                       |
| Cooper, H. and R. Geyer (2009)                                                                                                           | 2.33  | United Kingdom | Journal of evaluation in clinical practice     | Non-empirical      | Chronic disease management – diabetes                           |
| Cooper, H., E. Spencer-Dawe and E. McLean (2005)                                                                                         | 10.15 | United Kingdom | Journal of interprofessional care              | Empirical          | Education - medicine, nursing, physiotherapy, OT undergraduates |
| Copelli, F. H. d. S., R. J. T. d. Oliveira, C. M. S. d. Oliveira, B. H. S. Meirelles, A. L. S. F. d. Mello and A. L. P. Magalhães (2016) | 1.50  | Brazil         | Aquichan                                       | Review             | Nursing - leadership                                            |
| Copnell, B. (1998)                                                                                                                       | 1.00  | Australia      | Journal of advanced nursing                    | Non-empirical      | Nursing - nursing knowledge                                     |
| Coppa, D. F. (1993)                                                                                                                      | 1.84  | USA            | Journal of advanced nursing                    | Non-empirical      | Nursing                                                         |
| Cornforth, A. (2013)                                                                                                                     | 1.60  | United Kingdom | British journal of nursing                     | Non-empirical      | Primary care - self-management – COPD                           |
| Crabtree, B. F. (2003)                                                                                                                   | 3.13  | USA            | Health care management review                  | Non-empirical      | Primary care                                                    |
| Crabtree, B. F., P. A. Nutting, W. L. Miller, R. R. McDaniel, K. C. Stange, C. R. Jaen and E. Stewart (2011)                             | 17.57 | USA            | Medical care                                   | Non-empirical      | Primary care - change/improvement                               |
| Crabtree, B. F., W. L. Miller and K. C. Stange (2001)                                                                                    | 9.53  | USA            | Journal of family practice                     | Empirical          | Primary care                                                    |
| Cruz, R. A., E. L. Araujo, N. M. Nascimento, R. J. Lima, J. R. Franca and J. D. Oliveira (2017)                                          | 1.00  | Brazil         | Revista brasileira de enfermagem               | Unable to classify | Nursing - education                                             |
| Cucolo, D. F. and M. G. Perroca (2015)                                                                                                   | 3.67  | Brazil         | Acta paulista de enfermagem                    | Empirical          | Nursing                                                         |
| Curtis, S. and M. Riva (2010)                                                                                                            | 8.63  | United Kingdom | Progress in human geography                    | Non-empirical      | Human geography and health systems                              |
| Curtis, S. and M. Riva (2010)a                                                                                                           | 4.63  | United Kingdom | Progress in human geography                    | Non-empirical      | Human geography and health systems and policy                   |
| Curtis, S., K. Oven, J. Wistow, C. Dunn and L. Dominelli (2018)                                                                          | 3.00  | United Kingdom | Environment and planning c: politics and space | Empirical          | Aged - health and social care                                   |
| da Silva, A. L. and M. G. de Freitas (2010)                                                                                              | 0.50  | Brazil         | Revista da escola de enfermagem da usp         | Empirical          | Education                                                       |
| D'Agata, A. L. and J. M. McGrath (2016)                                                                                                  | 2.50  | USA            | Advances in nursing science                    | Non-empirical      | Hospital - neonatal ICU                                         |



|                                                                                                                             |       |                 |                                                |                    |                                                            |
|-----------------------------------------------------------------------------------------------------------------------------|-------|-----------------|------------------------------------------------|--------------------|------------------------------------------------------------|
| Dattee, B. and J. Barlow (2010)                                                                                             | 4.50  | United Kingdom  | Journal of health services research and policy | Empirical          | Whole system change                                        |
| Dattee, B. and J. Barlow (2017)                                                                                             | 1.00  | France          | Organization science                           | Empirical          | Healthcare system                                          |
| Davis, B. and D. Sumara (2010)                                                                                              | 9.25  | Canada          | Journal of evaluation in clinical practice     | Non-empirical      | Research - education                                       |
| de Bock, B. A., D. L. Willems and H. C. Weinstein (2018)                                                                    | 1.00  | The Netherlands | Journal of evaluation in clinical practice     | Empirical          | Hospital - ICU, decision making                            |
| De Simone, J. (2006)                                                                                                        | 2.33  | Italy           | Journal of evaluation in clinical practice     | Non-empirical      | Evidence-based medicine                                    |
| De Vito, E. L. (2016)                                                                                                       | 0     | Argentina       | Medicina                                       | Non-empirical      | Medicine                                                   |
| de Zulueta, P. C. (2016)                                                                                                    | 9.50  | United Kingdom  | Journal of healthcare leadership               | Non-empirical      | Leadership - compassionate leadership                      |
| deMattos, P. C., D. M. Miller and E. H. Park (2012)                                                                         | 2.83  | USA             | Management decision                            | Non-empirical      | Hospital - trauma- decision making                         |
| Deutsch, E. S., Y. Dong, L. P. Halamek, M. A. Rosen, J. M. Taekman and J. Rice (2016)                                       | 2.50  | USA             | Human factors                                  | Non-empirical      | Education                                                  |
| Doebbeling, B. N. and M. E. Flanagan (2011)                                                                                 | 1.86  | USA             | Medical care                                   | Non-empirical      | Healthcare systems                                         |
| Doll, W. E. and D. Trueit (2010)                                                                                            | 5.88  | USA             | Journal of evaluation in clinical practice     | Non-empirical      | Healthcare professionals broadly                           |
| Donaldson, A., E. Lank and J. Maher (2005)                                                                                  | 1.85  | United Kingdom  | Journal of change management                   | Non-empirical      | Education and learning - communities of practice in cancer |
| Donini, L. M., R. D. Grave, A. Caretto, L. Lucchin, N. Melchionda, E. Nisoli, P. Sbraccia, A. Lenzi and M. Cuzzolaro (2014) | 1.75  | Italy           | Eating and weight disorders                    | Non-empirical      | Health condition and its management - obesity              |
| Donnelly, F. and R. Wiechula (2012)                                                                                         | 2.17  | Australia       | Nurse education today                          | Non-empirical      | Education - nurse placement                                |
| Dreher, M. C., P. Clinton and A. Sperhac (2014)                                                                             | 2.50  | USA             | Journal of professional nursing                | Non-empirical      | Education                                                  |
| Dunn, K. S. and C. K. Riley-Doucet (2017)                                                                                   | 0     | USA             | Nurse educator                                 | Unable to classify | Nursing                                                    |
| Durie, R. and K. Wyatt (2007)                                                                                               | 3.18  | United Kingdom  | Social science & medicine                      | Empirical          | Health geography                                           |
| Durie, R. and K. Wyatt (2013)                                                                                               | 4.20  | United Kingdom  | Critical public health                         | Empirical          | Community and public health                                |
| Dyck, L. R., A. Caron and D. Aron (2006)                                                                                    | 1.58  | USA             | Journal of management development              | Non-empirical      | Change/improvement                                         |
| Edgren, L. (2008)                                                                                                           | 10.10 | Sweden          | International journal of integrated care       | Non-empirical      | Integrated care                                            |

|                                                                                                                |       |                |                                                     |               |                                            |
|----------------------------------------------------------------------------------------------------------------|-------|----------------|-----------------------------------------------------|---------------|--------------------------------------------|
| Edgren, L. and K. Barnard (2012)                                                                               | 8.33  | Sweden         | Leadership in health services                       | Non-empirical | Health and social care integration         |
| Eika, M., B. Dale, G. A. Espnes and S. Hvalvik (2015)                                                          | 3.67  | Norway         | Bmc health services research                        | Empirical     | Nursing homes - nursing - care transitions |
| Ellis, B. (2010)                                                                                               | 4.13  | United Kingdom | Informatics in primary care                         | Empirical     | Primary care                               |
| Ellis, B. and S. I. Herbert (2011)                                                                             | 6.43  | United Kingdom | Informatics in primary care                         | Non-empirical | Primary care - clinical governance         |
| Ellis, L. A., K. Churruca and J. Braithwaite (2017)                                                            | 2.00  | Australia      | International journal of mental health systems      | Non-empirical | Mental health services                     |
| Ellsbury, D. L. (2010)                                                                                         | 0.88  | USA            | Clinics in perinatology                             | Non-empirical | Hospital - neonatal medicine               |
| Erdek, M. A. and P. J. Pronovost (2004)                                                                        | 7.50  | USA            | International journal for quality in health care    | Empirical     | Hospital - pain assessment                 |
| Erdmann, A. L., K. C. d. Nascimento, G. Marcelino and J. A. Ribeiro (2005)                                     | 1.85  | Brazil         | Fascicles of escola anna nery revista de enfermagem | Empirical     | Education - graduate nurses                |
| Essen, A. and S. Lindblad (2013)                                                                               | 7.33  | Sweden         | Social science & medicine                           | Empirical     | Rheumatology                               |
| Fajardo Ortiz, G. (2013)                                                                                       | 0     | Mexico         | Ludus vitalis                                       | Non-empirical | Medicine                                   |
| Fajardo-Ortiz, G., M. A. Fernandez-Ortega, A. Ortiz-Montalvo and R. A. Olivares-Santos (2015)                  | 0.67  | Mexico         | Cirugía y cirujanos (english edition)               | Non-empirical | Health systems                             |
| Farmer, E. A., J. D. Beard, W. D. Dauphinee, T. LaDuca and K. V. Mann (2002)                                   | 2.19  | Australia      | Medical education                                   | Non-empirical | Medical performance assessment             |
| Favaretti, C. (2013)                                                                                           | 0.40  | Italy          | Recenti progressi in medicina                       | Non-empirical | Health care organisations generally        |
| Fennell, M. L. and C. M. Adams (2011)                                                                          | 2.43  | USA            | Annual review of sociology                          | Non-empirical | Health care organisations generally        |
| Fenwick, T. (2012)                                                                                             | 6.83  | United Kingdom | Journal of education and work                       | Non-empirical | Education - learning for collaboration     |
| Fenwick, T. and M. A. Dahlgren (2015)                                                                          | 16.33 | United Kingdom | Medical education                                   | Non-empirical | Education                                  |
| Fernandez, A., J. Sturmberg, S. Lukersmith, R. Madden, G. Torkfar, R. Colagiuri and L. Salvador-Carulla (2015) | 10.67 | Australia      | Health research policy and systems                  | Non-empirical | Evidence-based medicine movement history   |
| Florczak, K., M. Poradzisz and S. Hampson (2012)                                                               | 1.00  | USA            | Nursing science quarterly                           | Non-empirical | Nursing profession                         |
| Fontanesi, J., A. Martinez, T. O. Boyo and R. Gish (2015)                                                      | 0.33  | USA            | The journal of medical practice management: mpm     | Empirical     | Quality improvement                        |



|                                                                                                                           |       |                |                                            |               |                                                 |
|---------------------------------------------------------------------------------------------------------------------------|-------|----------------|--------------------------------------------|---------------|-------------------------------------------------|
| Forbes-Thompson, S., T. Leiker and M. R. Bleich (2007)                                                                    | 4.91  | USA            | Health care management review              | Empirical     | Nursing homes                                   |
| Ford, R. (2009)                                                                                                           | 5.56  | USA            | Health services management research        | Empirical     | Leadership                                      |
| Frame, A., M. LaMantia, B. B. Reddy Bynagari, P. Dexter and M. Boustani (2013)                                            | 2.20  | USA            | Egems                                      | Empirical     | Primary care - EHR – improvement                |
| Fraser, S. W. and T. Greenhalgh (2001)                                                                                    | 50.59 | United Kingdom | Bmj open                                   | Non-empirical | Education                                       |
| Frasso, R., A. Golinkoff, H. Klusaritz, K. Kellom, H. Kollar-McArthur, M. Miller-Day, R. Gabbay and P. F. Cronholm (2017) | 1.00  | USA            | Applied nursing research                   | Empirical     | Primary care - nurse-led practices              |
| Freddi, G. and J. L. Roman-Pumar (2011)                                                                                   | 2.00  | Italy          | Annali dell istituto superiore di sanita   | Non-empirical | Evidence-based medicine                         |
| Freed, D. H. (1995)                                                                                                       | 0     | USA            | Hospital material management quarterly     | Non-empirical | Health care generally - quality                 |
| Friel, S., L. Hattersley and R. Townsend (2015)                                                                           | 9.33  | Australia      | Annual review of public health             | Non-empirical | Public health - trade                           |
| Frye, A. W. and P. A. Hemmer (2012)                                                                                       | 28.00 | USA            | Medical teacher                            | Non-empirical | Education                                       |
| Gardam, M., L. Gitterman, L. Rykert and E. Vicencio (2017)                                                                | 0     | Canada         | Healthcare papers                          | Non-empirical | Health care delivery - safety                   |
| Gary, J. C. (2014)                                                                                                        | 1.25  | USA            | Dimensions of critical care nursing        | Empirical     | Improving patient-centred care - nursing - ICU  |
| Gatrell, A. C. (2005)                                                                                                     | 13.54 | United Kingdom | Social science & medicine                  | Non-empirical | Health geography                                |
| Gear, C., J. Koziol-McLain, D. Wilson and F. Clark (2016)                                                                 | 1.00  | New Zealand    | Bmc family practice                        | Empirical     | Primary care - family violence                  |
| Geary, C. R. and K. L. Schumacher (2012)                                                                                  | 7.17  | USA            | Advances in nursing science                | Non-empirical | Care transitions                                |
| Ghazzawi, A., C. Kuziemyky and T. O'Sullivan (2016)                                                                       | 3.50  | Canada         | Bmc health services research               | Empirical     | Stroke - rehabilitation - carers                |
| Glenn, L. A., J. Stocker-Schnieder, R. McCune, M. McClelland and D. King (2014)                                           | 2.00  | USA            | Journal of advanced nursing                | Empirical     | Hospital - nursing maternity care during labour |
| Glynn, L. G. and R. Scully (2010)                                                                                         | 1.00  | United Kingdom | International journal of clinical practice | Non-empirical | Healthcare generally                            |
| Goldberger, A. L. (1996)                                                                                                  | 39.59 | USA            | The lancet                                 | Non-empirical | Medical practice                                |
| Goldman, E., M. Plack, C. Roche, J. Smith and C. Turley (2009)                                                            | 5.11  | USA            | Journal of workplace learning              | Empirical     | Hospital - emergency department/ learning       |

|                                                                                                                                                                    |       |                |                                                                                  |                    |                                           |
|--------------------------------------------------------------------------------------------------------------------------------------------------------------------|-------|----------------|----------------------------------------------------------------------------------|--------------------|-------------------------------------------|
| Gonnering, R. S. (2010)                                                                                                                                            | 1.00  | USA            | Journal of surgical education                                                    | Non-empirical      | Education - surgical                      |
| Gonzalez, M. G., K. N. Kelly, A. M. Dozier, F. Fleming, J. R. T. Monson, A. Z. Becerra, C. T. Aquina, C. P. Probst, B. J. Hensley, N. Sevdalis and K. Noyes (2017) | 1.00  | USA            | Qualitative health research                                                      | Empirical          | Hospital - surgical care – transitions    |
| Gordon, L., C. Rees, J. Ker and J. Cleland (2017)                                                                                                                  | 1.00  | United Kingdom | Advances in health sciences education                                            | Empirical          | Leadership                                |
| Gormley, G. J. and T. Fenwick (2016)                                                                                                                               | 3.00  | United Kingdom | Perspectives on medical education                                                | Empirical          | Education - medical                       |
| Grady, C. M. (2016)                                                                                                                                                | 4.00  | Canada         | Leadership in health services                                                    | Empirical          | Leadership - medical                      |
| Green, C. A., S. E. Estroff, B. J. H. Yarborough, M. Spofford, M. R. Solloway, R. S. Kitson and N. A. Perrin (2014)                                                | 5.75  | USA            | Schizophrenia bulletin                                                           | Non-empirical      | Mental health care                        |
| Greene, R. A., E. Dasso, S. Ho and A. M. Genaidy (2014)                                                                                                            | 2.25  | USA            | Population health management                                                     | Non-empirical      | Health care systems - person-centred care |
| Greenhalgh, T., P. Plsek, T. Wilson, S. Fraser and T. Holt (2010)                                                                                                  | 5.88  | United Kingdom | Journal of health services research and policy                                   | Non-empirical      | Research                                  |
| Griffiths, F. and D. Byrne (1998)                                                                                                                                  | 4.20  | United Kingdom | British journal of general practice                                              | Non-empirical      | Primary care                              |
| Griffiths, F. and G. North American Primary Care Research (2007)                                                                                                   | 1.45  | United Kingdom | Annals of family medicine                                                        | Non-empirical      | Primary care                              |
| Grudniewicz, A., T. Tenbenschel, J. M. Evans, C. Steele Gray, G. R. Baker and W. P. Wodchis (2018)                                                                 | 0     | Canada         | Social science & medicine                                                        | Empirical          | Health policy - integrated care           |
| Haffeld, J. (2012)                                                                                                                                                 | 2.67  | Norway         | Global public health: an international journal for research, policy and practice | Non-empirical      | Global health system                      |
| Haffeld, J. (2013)                                                                                                                                                 | 1.40  | USA            | Reproductive health matters                                                      | Non-empirical      | Health systems - governance               |
| Haffeld, J. and H. Siem (2013)                                                                                                                                     | 1.00  | Norway         | Current pharmogenomics and personalized medicine                                 | Unable to classify | Policy and governance international       |
| Hafferty, F. W. and B. Castellani (2010)                                                                                                                           | 13.50 | USA            | Academic medicine                                                                | Non-empirical      | Medical professionalism                   |
| Hafferty, F. W. and D. Levinson (2008)                                                                                                                             | 9.50  | USA            | Perspectives in biology and medicine                                             | Non-empirical      | Medicine - professionalism                |
| Haigh, C. (2002)                                                                                                                                                   | 3.81  | United Kingdom | Journal of advanced nursing                                                      | Non-empirical      | Nursing                                   |

|                                                                                                                                                         |       |                |                                                                                                    |                    |                                            |
|---------------------------------------------------------------------------------------------------------------------------------------------------------|-------|----------------|----------------------------------------------------------------------------------------------------|--------------------|--------------------------------------------|
| Haigh, C. A. (2008)                                                                                                                                     | 0.80  | United Kingdom | Journal of nursing management                                                                      | Empirical          | Nursing - management                       |
| Hall, P., L. Weaver and P. A. Grassau (2013)                                                                                                            | 4.40  | Canada         | Journal of interprofessional care                                                                  | Non-empirical      | Integrated care - education                |
| Hamilton, A. B., M. M. Farmer, T. Moin, E. P. Finley, A. J. Lang, S. M. Oishi, A. K. Huynh, J. Zuchowski, S. G. Haskell and B. Bean-Mayberry (2017)     | 1.00  | USA            | Implementation science                                                                             | Non-empirical      | Primary care - women's health              |
| Hammerly, M. (2002)                                                                                                                                     | 0.44  | USA            | American journal of medical quality                                                                | Non-empirical      | Collaborative medicine                     |
| Hanseth, O., E. Jacucci, M. Grisot and M. Aanestad (2006)                                                                                               | 21.75 | Norway         | Mis quarterly                                                                                      | Empirical          | Hospital – HER                             |
| Hast, A. S., A. M. DiGioia, D. Thompson and G. Wolf (2013)                                                                                              | 3.00  | USA            | Journal of nursing administration                                                                  | Unable to classify | Organisational change                      |
| Henriksen, E. and U. Rosenqvist (2003)                                                                                                                  | 2.33  | Sweden         | Health & social care in the community                                                              | Empirical          | Aged care                                  |
| Hill, P. S. (2011)                                                                                                                                      | 11.13 | Australia      | Global public health: an international journal for research, policy and practice                   | Non-empirical      | Governance - health care systems           |
| Hilts, L., M. Howard, D. Price, C. Risdon, G. Agarwal and A. Childs (2013)                                                                              | 3.40  | Canada         | Family practice                                                                                    | Empirical          | Primary care                               |
| Ho, S. and L. G. Sandy (2014)                                                                                                                           | 1.75  | USA            | Journal of general internal medicine                                                               | Non-empirical      | Health care system - economics and funding |
| Hoben, M., P. G. Norton, L. R. Ginsburg, R. A. Anderson, G. G. Cummings, H. J. Lanham, J. E. Squires, D. Taylor, A. S. Wagg and C. A. Estabrooks (2017) | 5.00  | Canada         | Trials                                                                                             | Non-empirical      | Nursing home - quality and improvement     |
| Hodges, H. F. (2011)                                                                                                                                    | 7.43  | USA            | Journal of nursing education                                                                       | Empirical          | Education - nursing                        |
| Hoffman, E. (2000)                                                                                                                                      | 1.22  | USA            | Academic medicine                                                                                  | Non-empirical      | Women's health - educating about           |
| Holden, L. M. (2005)                                                                                                                                    | 14.46 | USA            | Journal of advanced nursing                                                                        | Non-empirical      | Nursing                                    |
| Holder, R. and C. Ramagem (2012)                                                                                                                        | 2.17  | USA            | World hospitals and health services: the official journal of the international hospital federation | Non-empirical      | Leadership                                 |
| Holmboe, E. S. (2018)                                                                                                                                   | 3.00  | USA            | Academic medicine                                                                                  | Non-empirical      | Education - medicine                       |

|                                                                                                                                                                                                                                                                                                                                   |      |                |                                            |               |                                                     |
|-----------------------------------------------------------------------------------------------------------------------------------------------------------------------------------------------------------------------------------------------------------------------------------------------------------------------------------|------|----------------|--------------------------------------------|---------------|-----------------------------------------------------|
| Homa, L., J. Rose, P. S. Hovmand, S. T. Cherng, R. L. Riolo, A. Kraus, A. Biswas, K. Burgess, H. Aungst, K. C. Stange, K. Brown, M. Brooks-Terry, E. Dec, B. Jackson, J. Gilliam, G. E. Kikano, A. Reichsman, D. Schaadt, J. Hilfer, C. Ticknor, C. V. Tyler, A. Van der Meulen, H. Ways, R. F. Weinberger and C. Williams (2015) | 5.00 | USA            | Annals of family medicine                  | Empirical     | Primary care                                        |
| Hopkinson, S. G. and D. L. Wiegand (2017)                                                                                                                                                                                                                                                                                         | 0    | USA            | Journal of clinical nursing                | Empirical     | Nursing practice                                    |
| Horvat, A. and J. Filipovic (2018)                                                                                                                                                                                                                                                                                                | 5.00 | Serbia         | Journal of evaluation in clinical practice | Empirical     | Leadership                                          |
| Hunt, S. R., K. Corazzini and R. A. Anderson (2014)                                                                                                                                                                                                                                                                               | 4.50 | USA            | Journal of applied gerontology             | Empirical     | Nursing homes - management - care quality           |
| Hutchison, D. (1994)                                                                                                                                                                                                                                                                                                              | 0.54 | USA            | Quality progress                           | Non-empirical | Quality management - health care organisation       |
| Innes, A. D., P.D. Campion and F.E. Griffiths (2005)                                                                                                                                                                                                                                                                              | 8.15 | United Kingdom | British journal of general practice        | Non-empirical | Clinical consultation                               |
| Irimu, G. W., A. Greene, D. Gathara, H. Kihara, C. Maina, D. Mbori-Ngacha, D. Zurovac, M. Santau, J. Todd and M. English (2014)                                                                                                                                                                                                   | 1.50 | Kenya          | Bmc health services research               | Empirical     | Implementation of CPGs                              |
| Issel, L. M. and R. A. Anderson (2001)                                                                                                                                                                                                                                                                                            | 0.88 | USA            | Research in nursing and health             | Empirical     | Community case managers - nursing - decision making |
| James, K. M. (2010)                                                                                                                                                                                                                                                                                                               | 3.38 | USA            | Creative nursing                           | Non-empirical | Education - nursing                                 |
| Jana, M., L. Letsela, E. Scheepers and R. Weiner (2015)                                                                                                                                                                                                                                                                           | 1.00 | South Africa   | Journal of health communication            | Non-empirical | Public health - health promotion/communication      |
| Jolley, G. (2014)                                                                                                                                                                                                                                                                                                                 | 9.00 | Australia      | Evaluation and program planning            | Non-empirical | Health promotion - community care                   |
| Joly, B. M., M. Booth, P. Mittal and G. Shaler (2012)                                                                                                                                                                                                                                                                             | 3.17 | USA            | Evaluation & the health professions        | Non-empirical | Quality improvement                                 |
| Jorm, C. and C. Roberts (2018)                                                                                                                                                                                                                                                                                                    | 3.00 | Australia      | Academic medicine                          | Non-empirical | Education - evaluation                              |
| Jorm, C., G. Nisbet, C. Roberts, C. Gordon, S. Gentilcore and T. F. Chen (2016)                                                                                                                                                                                                                                                   | 4.50 | Australia      | Bmc medical education                      | Empirical     | Education - interprofessional learning              |
| Joshi, R., D. Joshi and P. Cheriya (2017)                                                                                                                                                                                                                                                                                         | 5.00 | USA            | Patient preference and adherence           | Empirical     | Diabetes management - technology app                |

|                                                                                                                                   |      |                              |                                                 |               |                                                                                |
|-----------------------------------------------------------------------------------------------------------------------------------|------|------------------------------|-------------------------------------------------|---------------|--------------------------------------------------------------------------------|
| Juarez, F. (2010)                                                                                                                 | 0    | Colombia                     | International journal of psychological research | Empirical     | Health system - economic                                                       |
| Kaehne, A. (2016)                                                                                                                 | 3.00 | United Kingdom               | Journal of integrated care                      | Non-empirical | Programme evaluation (integration programmes)                                  |
| Kapp, J. M., E. J. Simoes, A. DeBiasi and S. J. Kravet (2017)                                                                     | 4.00 | USA                          | Systems research and behavioural science        | Non-empirical | Population health - improvement                                                |
| Karam, E., M. C. Levesque, G. Jacquemin, A. Delure, I. Robidoux, M. T. Laramée, A. Odobescu, P. G. Harris and A. M. Danino (2014) | 1.50 | Canada                       | Annals of burns and fire disasters              | Empirical     | Multidisciplinary teams                                                        |
| Karemere, H. and J. Macq (2014)                                                                                                   | 0.50 | Democratic Republic of Congo | Global health promotion                         | Empirical     | Hospital                                                                       |
| Karemere, H., J. B. Kahindo, N. Ribesse and J. Macq (2013)                                                                        | 0.40 | Democratic Republic of Congo | Medecine et sante tropicales                    | Non-empirical | Hospital - governance                                                          |
| Karemere, H., N. Ribesse, B. Marchal and J. Macq (2015)                                                                           | 1.00 | Democratic Republic of Congo | Conflict and health                             | Empirical     | Hospital                                                                       |
| Karemere, H., N. Ribesse, J.-B. Kahindo and J. Macq (2015)                                                                        | 1.00 | Democratic Republic of Congo | The pan african medical journal                 | Empirical     | Hospital                                                                       |
| Katerndahl, D., R. Wood and C. R. Jaen (2017)                                                                                     | 0    | USA                          | Journal of evaluation in clinical practice      | Empirical     | Ambulatory care                                                                |
| Kernick, D. (2006)                                                                                                                | 7.75 | United Kingdom               | Family practice                                 | Non-empirical | Health service generally                                                       |
| Kernick, D. and A. Mitchell (2010)                                                                                                | 1.56 | United Kingdom               | Journal of interprofessional care               | Non-empirical | Co-production - patient-centredness                                            |
| Khan, B. A., S. Lasiter and M. A. Boustani (2015)                                                                                 | 0    | USA                          | The american journal of nursing                 | Non-empirical | Hospital - ICU                                                                 |
| Khan, S., A. Vandermorris, J. Shepherd, J. W. Begun, H. J. Lanham, M. Uhl-Bien and W. Berta (2018)                                | 0    | Canada                       | Bmc health services research                    | Non-empirical | Healthcare generally                                                           |
| Khan, Y., S. Sanford, D. Sider, K. Moore, G. Garber, E. de Villa and B. Schwartz (2017)                                           | 0    | Canada                       | Bmc health services research                    | Empirical     | Hospital and public health - emergency departments during "emerging incidents" |

|    |                                                                                                                                             |      |                |                                               |               |                                            |
|----|---------------------------------------------------------------------------------------------------------------------------------------------|------|----------------|-----------------------------------------------|---------------|--------------------------------------------|
| 1  |                                                                                                                                             |      |                |                                               |               |                                            |
| 2  |                                                                                                                                             |      |                |                                               |               |                                            |
| 3  |                                                                                                                                             |      |                |                                               |               |                                            |
| 4  | Khayal, I. S. and A. M. Farid (2018)                                                                                                        | 2.00 | USA            | Complexity                                    | Non-empirical | Health care systems - chronic care         |
| 5  | Killingsworth, B., H. E. Newkirk and E. Seeman (2006)                                                                                       | 2.08 | USA            | Health care management review                 | Non-empirical | Hospital - strategic information systems   |
| 6  |                                                                                                                                             |      |                |                                               |               |                                            |
| 7  |                                                                                                                                             |      |                |                                               |               |                                            |
| 8  | Kingsley, P. and E. M. Taylor (2017)                                                                                                        | 9.00 | United Kingdom | Parasitology                                  | Non-empirical | Health care systems - integration          |
| 9  |                                                                                                                                             |      |                |                                               |               |                                            |
| 10 | Koerich, M. S., D. S. Backes, K. C. d. Nascimento and A. L. Erdmann (2007)                                                                  | 3.82 | Brazil         | Acta paulista de enfermagem                   | Empirical     | Hospital - nursing assistant               |
| 11 |                                                                                                                                             |      |                |                                               |               |                                            |
| 12 | Koerner, J. (2009)                                                                                                                          | 1.11 | USA            | Creative nursing                              | Non-empirical | Nursing - decision making                  |
| 13 | Koerner, J. G. (1996)                                                                                                                       | 0.36 | USA            | Nursing administration quarterly              | Non-empirical | Nursing                                    |
| 14 |                                                                                                                                             |      |                |                                               |               |                                            |
| 15 | Kottke, T. E., J. A. Huebsch, P. McGinnis, J. M. Nichols, E. D. Parker, J. O. Tillema and M. V. Maciosek (2016)                             | 2.00 | USA            | The permanente journal                        | Empirical     | Primary care - collaboration               |
| 16 |                                                                                                                                             |      |                |                                               |               |                                            |
| 17 |                                                                                                                                             |      |                |                                               |               |                                            |
| 18 | Kramer, M., B. B. Brewer, D. Halfer, P. Maguire, S. Beausoleil, K. Claman, M. Macphee and J. B. Duchscher (2013)                            | 4.40 | USA            | Journal of nursing management                 | Empirical     | Nursing                                    |
| 19 |                                                                                                                                             |      |                |                                               |               |                                            |
| 20 |                                                                                                                                             |      |                |                                               |               |                                            |
| 21 | Kuipers, P., D. Harvey, M. Lindeman and K. Stothers (2014)                                                                                  | 1.25 | AUstralia      | Rural and remote health                       | Non-empirical | Workforce - rural - education and training |
| 22 |                                                                                                                                             |      |                |                                               |               |                                            |
| 23 |                                                                                                                                             |      |                |                                               |               |                                            |
| 24 | Kuziemy, C. (2016)                                                                                                                          | 6.33 | Canada         | Healthcare management forum                   | Non-empirical | Decision making                            |
| 25 |                                                                                                                                             |      |                |                                               |               |                                            |
| 26 | Kuziemy, C. E., E. M. Borycki and A. W. Kushniruk (2016)                                                                                    | 0.50 | Canada         | Nursing informatics                           | Non-empirical | Health information technology              |
| 27 |                                                                                                                                             |      |                |                                               |               |                                            |
| 28 | Lachman, P., A. Jayadev and M. Rahi (2014)                                                                                                  | 3.50 | United Kingdom | Early human development                       | Non-empirical | Hospital - NICU                            |
| 29 |                                                                                                                                             |      |                |                                               |               |                                            |
| 30 | Laliberte, M., D. E Feldman, B. Williams-Jones and M. Hunt (2018)                                                                           | 0    | Canada         | Physiotherapy theory and practice             | Empirical     | Physiotherapy - prioritising care          |
| 31 |                                                                                                                                             |      |                |                                               |               |                                            |
| 32 |                                                                                                                                             |      |                |                                               |               |                                            |
| 33 | Lalley, C. (2014)                                                                                                                           | 1.75 | USA            | Nursing administration quarterly              | Empirical     | Nursing - leadership - workarounds         |
| 34 |                                                                                                                                             |      |                |                                               |               |                                            |
| 35 | Lamarche, P. and L. Maillet (2016)                                                                                                          | 1.00 | Canada         | Journal of health organization and management | Non-empirical | Primary care                               |
| 36 |                                                                                                                                             |      |                |                                               |               |                                            |
| 37 |                                                                                                                                             |      |                |                                               |               |                                            |
| 38 | Landis-Lewis, Z., R. Manjomo, O. J. Gadabu, M. Kam, B. N. Simwaka, S. L. Zickmund, F. Chimbwandira, G. P. Douglas and R. S. Jacobson (2015) | 3.67 | USA            | International journal of medical informatics  | Empirical     | Health system - Malawi EMR implementation  |
| 39 |                                                                                                                                             |      |                |                                               |               |                                            |
| 40 |                                                                                                                                             |      |                |                                               |               |                                            |
| 41 |                                                                                                                                             |      |                |                                               |               |                                            |
| 42 |                                                                                                                                             |      |                |                                               |               |                                            |
| 43 |                                                                                                                                             |      |                |                                               |               |                                            |
| 44 |                                                                                                                                             |      |                |                                               |               |                                            |
| 45 |                                                                                                                                             |      |                |                                               |               |                                            |
| 46 |                                                                                                                                             |      |                |                                               |               |                                            |
| 47 |                                                                                                                                             |      |                |                                               |               |                                            |



|                                                                                                                                                           |       |                |                                            |               |                                                                   |
|-----------------------------------------------------------------------------------------------------------------------------------------------------------|-------|----------------|--------------------------------------------|---------------|-------------------------------------------------------------------|
| Lanham, H. J., L. K. Leykum, B. S. Taylor, C. J. McCannon, C. Lindberg and R. T. Lester (2013)                                                            | 15.6  | USA            | Social science & medicine                  | Non-empirical | Health care systems                                               |
| Larkin, D. J., R. C. Swanson, S. Fuller and D. A. Cortese (2016)                                                                                          | 7.00  | USA            | Journal of evaluation in clinical practice | Non-empirical | Health system - US and affordable care act                        |
| Laudenslager, M. L. (2014)                                                                                                                                | 3.25  | USA            | Brain, behavior, and immunity              | Non-empirical | Caregivers                                                        |
| Laurenson, M., T. Heath and S. Gribbin (2012)                                                                                                             | 0.60  | United Kingdom | Journal of healthcare leadership           | Empirical     | Education - leadership                                            |
| Learmonth, A. M., E. J. Henderson and D. J. Hunter (2017)                                                                                                 | 0     | United Kingdom | Journal of public health                   | Empirical     | Public health                                                     |
| Lefroy, J. and S. Yardley (2015)                                                                                                                          | 3.00  | United Kingdom | Medical education                          | Non-empirical | Education                                                         |
| Lemak, C. H. and E. Goodrick (2003)                                                                                                                       | 1.67  | USA            | Health care management review              | Empirical     | Primary care - dental, medical, social for low income populations |
| Lessard, C. (2007)                                                                                                                                        | 6.09  | Canada         | Social science & medicine                  | Non-empirical | Research - economic evaluation                                    |
| Lett, M. (2001)                                                                                                                                           | 0.53  | Australia      | Australian journal of advanced nursing     | Non-empirical | Nursing practice                                                  |
| Leykum, L. K., H. J. Lanham, J. A. Pugh, M. Parchman, R. A. Anderson, B. F. Crabtree, P. A. Nutting, W. L. Miller, K. C. Stange and R. R. McDaniel (2014) | 8.00  | USA            | Implementation science                     | Empirical     | Improvement                                                       |
| Leykum, L. K., J. A. Pugh, H. J. Lanham, J. Harmon and R. R. McDaniel (2009)                                                                              | 9.11  | USA            | Implementation science                     | Non-empirical | Implementation - evidence-based practice                          |
| Leykum, L. K., J. Pugh, V. Lawrence, M. Parchman, P. H. Noel, J. Cornell and R. R. McDaniel (2007)                                                        | 6.82  | USA            | Implementation science                     | Review        | Diabetes care                                                     |
| Lindberg, C. and M. Schneider (2013)                                                                                                                      | 2.60  | USA            | Leadership                                 | Empirical     | Leadership                                                        |
| Lindberg, C., A. Herzog, M. Merry and J. Goldstein (1998)                                                                                                 | 0.25  | USA            | Physician executive                        | Non-empirical | Leadership                                                        |
| Litaker, D., A. Tomolo, V. Liberatore, K. C. Stange and D. Aron (2006)                                                                                    | 11.83 | USA            | Journal of general internal medicine       | Non-empirical | Primary care - quality improvement                                |
| Liu, Y. (2008)                                                                                                                                            | 2.20  | USA            | Journal of nursing management              | Non-empirical | Nursing - communication - decision making - cross culture         |
| Liu, Z. C., D. Rexachs, F. Epelde and E. Luque (2017)                                                                                                     | 3.00  | Spain          | Journal of computational science           | Empirical     | Hospital - emergency department                                   |

|                                                                                                                                                     |      |                |                                                         |               |                                                                                                          |
|-----------------------------------------------------------------------------------------------------------------------------------------------------|------|----------------|---------------------------------------------------------|---------------|----------------------------------------------------------------------------------------------------------|
| Longo, F. (2007)                                                                                                                                    | 4.27 | Italy          | Health care management review                           | Non-empirical | Leadership - change management                                                                           |
| Lorthios-Guilledroit, A., L. Richard and J. Filiatrault (2018)                                                                                      | 1.00 | Canada         | Evaluation and program planning                         | Review        | Health promotion - community care                                                                        |
| Luria, J. W., S. E. Muething, P. J. Schoettker and U. R. Kotagal (2006)                                                                             | 6.08 | USA            | Pediatric clinics of north america                      | Non-empirical | Safety - paediatrics                                                                                     |
| MacLean, S., L. Berends and J. Mugavin (2013)                                                                                                       | 0.67 | Australia      | Australian journal of primary health                    | Empirical     | Primary care - drug and alcohol - improvement                                                            |
| Mahajan, A., S. D. Islam, M. J. Schwartz and M. Cannesson (2017)                                                                                    | 0    | USA            | Anesthesia & analgesia                                  | Non-empirical | Hospital - perioperative services - process improvement                                                  |
| Marchal, B., S. Belle, V. De Brouwere and S. Witter (2013)                                                                                          | 3.40 | Belgium        | Bmc health services research                            | Non-empirical | Health care policy                                                                                       |
| Mark, A. and M. Jones (2013)                                                                                                                        | 1.00 | United Kingdom | The international journal of health planning management | Non-empirical | Health care systems - instability/disturbance                                                            |
| Markham, F. W. (1998)                                                                                                                               | 0.50 | USA            | Theoretical medicine and bioethics                      | Non-empirical | Education - medical                                                                                      |
| Marks, E. (2013)                                                                                                                                    | 3.80 | USA            | Jama internal medicine                                  | Non-empirical | Hospital - readmission rates                                                                             |
| Marsland, S. and L. Buchan (2004)                                                                                                                   | 0.93 | United Kingdom | Medinfo                                                 | Non-empirical | Health informatics                                                                                       |
| Martin, C. and J. Sturmberg (2009)                                                                                                                  | 6.89 | Canada         | Journal of evaluation in clinical practice              | Non-empirical | Primary care - chronic care (health promotion, prevention, self-management, disease control. Treatment). |
| Martin, C. M. and J. P. Sturmberg (2005)                                                                                                            | 5.92 | Canada         | Medical journal of australia                            | Non-empirical | Primary care                                                                                             |
| Mash, B. J., P. Mayers, H. Conradie, A. Orayn, M. Kuiper and J. Marais (2008)                                                                       | 2.80 | South Africa   | Education for health                                    | Empirical     | Primary care                                                                                             |
| Matheson, A., K. Dew and J. Cumming (2009)                                                                                                          | 3.11 | New Zealand    | Health promotion journal of australia                   | Empirical     | Community health - health inequality                                                                     |
| Matlow, A. G., J. G. Wright, B. Zimmerman, K. Thomson and M. Valente (2006)                                                                         | 5.00 | Canada         | Quality and safety in health care                       | Non-empirical | Coordination of care, paediatrics                                                                        |
| Matthews, J. I. and P. T. Thomas (2007)                                                                                                             | 2.18 | United Kingdom | International journal of health care quality assurance  | Empirical     | Learning                                                                                                 |
| McAllister, C., L. K. Leykum, H. Lanham, H. S. Reisinger, J. L. Kohn, R. Palmer, C. Pezzia, M. Agar, M. Parchman, J. Pugh and R. R. McDaniel (2014) | 3.50 | USA            | Journal of hospital medicine                            | Empirical     | Hospital - teams relationship with patient outcomes                                                      |



|                                                                                  |       |                |                                            |                    |                                        |
|----------------------------------------------------------------------------------|-------|----------------|--------------------------------------------|--------------------|----------------------------------------|
| McConnell, E. S., D. Lekan-Rutledge, B. Nevidjon and R. Anderson (2004)          | 2.07  | USA            | Journal of nursing education               | Non-empirical      | Education - aged care                  |
| McDaniel, R. R. (1997)                                                           | 9.38  | USA            | Health care management review              | Non-empirical      | Leadership/management                  |
| McDaniel, R. R., Jr. (1999)                                                      | 0.11  | USA            | Frontiers of health service management     | Unable to classify | Leadership/management                  |
| McDaniel, R. R., M. E. Jordan and B. F. Fleeman (2003)                           | 10.80 | USA            | Health care management review              | Non-empirical      | Learning                               |
| McHattie, L.-S., G. Cumming and T. French (2014)                                 | 3.00  | United Kingdom | Medicine 2.0                               | Non-empirical      | Person-centred care                    |
| McKenzie, A., E. Sokpo and A. Ager (2014)                                        | 1.00  | South Africa   | Journal of public health in africa         | Empirical          | Public health                          |
| McKeon, L. M., J. D. Oswaks and P. D. Cunningham (2006)                          | 5.75  | USA            | Critical nurse specialist                  | Non-empirical      | Hospital – teams                       |
| McKimm, J. and A. Till (2015).                                                   | 2.33  | United Kingdom | British journal of hospital medicine       | Non-empirical      | Clinical leadership                    |
| McKinney, S. H., K. Corazzini, R. A. Anderson, R. Sloane and N. G. Castle (2016) | 1.50  | USA            | Health care management review              | Empirical          | Nursing home - leadership – nursing    |
| McMurtry, A. (2010)                                                              | 5.33  | Canada         | Journal of interprofessional care          | Empirical          | Educational                            |
| McMurtry, A., S. Rohse and K. N. Kilgour (2016)                                  | 9.50  | Canada         | Medical education                          | Non-empirical      | Education - interprofessional learning |
| Mennin, S. (2010)                                                                | 17.25 | USA            | Medical education                          | Non-empirical      | Education - learning - medicine        |
| Mennin, S. (2010)a                                                               | 3.63  | USA            | Journal of evaluation in clinical practice | Non-empirical      | Education                              |
| Merry, A. F. (2011)                                                              | 0.57  | New Zealand    | The journal of extracorporeal technology   | Non-empirical      | Safety - decision making               |
| Miles, A. (2009)                                                                 | 4.22  | United Kingdom | Journal of evaluation in clinical practice | Non-empirical      | Medicine and healthcare                |
| Miller, W. L., B. F. Crabtree, P. A. Nutting, K. C. Stange and C. R. Jaen (2010) | 18.13 | USA            | Annals of family medicine                  | Non-empirical      | Primary care                           |
| Miller, W. L., B. F. Crabtree, R. McDaniel and K. C. Stange (1998)               | 14.35 | USA            | Journal of family practice                 | Non-empirical      | Primary care                           |
| Miller, W. L., R. R. McDaniel, B. F. Crabtree and K. C. Stange (2001)            | 14.82 | USA            | Journal of family practice                 | Empirical          | Primary care                           |

|    |                                                                                                                                                                           |       |                |                                               |                    |                                                   |
|----|---------------------------------------------------------------------------------------------------------------------------------------------------------------------------|-------|----------------|-----------------------------------------------|--------------------|---------------------------------------------------|
| 1  | Minas, H. (2005)                                                                                                                                                          | 3.54  | Australia      | Australian psychiatry                         | Non-empirical      | Leadership- for change in mental health           |
| 2  | Mitchell, D. (2014)                                                                                                                                                       | 0.50  | United Kingdom | Journal of evaluation in clinical practice    | Non-empirical      | Patient perspectives                              |
| 3  | Mitchell, G. J., N. Cross, M. Wilson, S. Biernacki, W. N. Wong, B. Adib and D. Rush (2013)                                                                                | 2.00  | Canada         | Nursing research and practice                 | Non-empirical      | Chronic illness management - nursing health coach |
| 4  | Mitleton-Kelly, E. (2011)                                                                                                                                                 | 7.86  | United Kingdom | The learning organization                     | Empirical          | Health system sustainability                      |
| 5  | Mohr, J. J., P. Batalden and P. Barach (2004)                                                                                                                             | 10.36 | USA            | Quality and safety in health care             | Non-empirical      | Health care organisations generally               |
| 6  | Monrouxe, L. V., C. E. Rees and W. Hu (2011)                                                                                                                              | 18.43 | United Kingdom | Medical education                             | Empirical          | Education – medicine                              |
| 7  | Moretti-Pires, R. O. (2009)                                                                                                                                               | 10.89 | Brazil         | Interface - comunicação, saúde, educação      | Empirical          | Primary care                                      |
| 8  | Morton, A. and J. Cornwell (2009)                                                                                                                                         | 3.33  | United Kingdom | Bmj                                           | Non-empirical      | Hospital - process improvement                    |
| 9  | Mowles, C., A. van der Gaag and J. Fox (2010)                                                                                                                             | 4.00  | United Kingdom | Journal of health organization and management | Non-empirical      | Health care systems - change                      |
| 10 | Mulready-Shick, J. and K. Flanagan (2014)                                                                                                                                 | 5.00  | USA            | Nursing education perspective                 | Empirical          | Education                                         |
| 11 | Munday, D. F., S. A. Johnson and F. E. Griffiths (2003)                                                                                                                   | 1.67  | United Kingdom | Palliative medicine                           | Non-empirical      | Palliative care                                   |
| 12 | Murai, M., K. Kitamura and M. D. Fetters (2005)                                                                                                                           | 2.46  | USA            | Bmc medical education                         | Empirical          | Primary care – education                          |
| 13 | Murray, P. J. (1992)                                                                                                                                                      | 0.12  | United Kingdom | Intensive and critical care nursing           | Non-empirical      | Nursing - critical care - education               |
| 14 | Nardi, R., G. Scanelli, S. Corrao, I. Iori, G. Mathieu and R. C. Amatrian (2007)                                                                                          | 10.00 | Italy          | European journal of internal medicine         | Non-empirical      | Internal medicine                                 |
| 15 | Nardi, R., T. Fabbri, G. Belmonte, P. Leandri, M. Mazzetti, A. Pasquale, M. Reta, C. Rizzi, G. Scanelli, I. Iori, G. Gussoni, C. Pedace, G. Mathieu and A. Mazzone (2009) | 1.20  | Italy          | Italian journal of medicine                   | Unable to classify | Internal medicine - evidence based medicine       |

|                                                                                                                  |       |                 |                                                |               |                                                             |
|------------------------------------------------------------------------------------------------------------------|-------|-----------------|------------------------------------------------|---------------|-------------------------------------------------------------|
| Nieuwenhuijze, M., S. Downe, H. Gottfreosdottir, M. Rijnders, A. du Preez and P. V. Rebelo (2015)                | 1.33  | The Netherlands | Midwifery                                      | Review        | Hospital – midwifery                                        |
| Noel, P. H., H. J. Lanham, R. F. Palmer, L. K. Leykum and M. L. Parchman (2013)                                  | 11.00 | USA             | Health care management review                  | Empirical     | Primary care - chronic care-teamwork – learning             |
| Noll, D. C. (1996).                                                                                              | 0     | USA             | Medical group management journal               | Non-empirical | Management/leadership                                       |
| Noll, D. C. (1997)                                                                                               | 0.19  | USA             | Medical group management journal               | Non-empirical | Healthcare systems generally                                |
| Norman, C. D. (2009)                                                                                             | 7.67  | Canada          | Journal of evaluation in clinical practice     | Non-empirical | Health promotion                                            |
| Norman, C. D. (2013)                                                                                             | 1.60  | Canada          | Journal of evaluation in clinical practice     | Non-empirical | Education                                                   |
| Norman, C. D., J. Charnaw-Burger, A. L. Yip, S. Saad and C. Lombardo (2010)                                      | 2.88  | Canada          | Journal of evaluation in clinical practice     | Non-empirical | Learning - networks, knowledge generation                   |
| Norman, G. (2011)                                                                                                | 3.71  | Canada          | Medical education                              | Non-empirical | Medicine – education                                        |
| Notarnicola, I., C. Petrucci, M. R. De Jesus Barbosa, F. Giorgi, A. Stievano, G. Rocco and L. Lancia (2017)      | 2.00  | Italy           | International journal of nursing practice      | Review        | Nursing                                                     |
| Olive, P. (2017)                                                                                                 | 1.00  | United Kingdom  | Journal of clinical nursing                    | Empirical     | Hospital - ED following intimate partner violence           |
| Olive, P. (2017)a                                                                                                | 0.50  | United Kingdom  | Journal of clinical nursing                    | Empirical     | Hospital - emergency department - intimate partner violence |
| Orlowski, S., S. Lawn, M. Ben, A. Venning, G. Jones, M. Winsall, G. Antezana, N. Bidargaddi and P. Musiat (2017) | 0.50  | Australia       | International journal of mental health nursing | Empirical     | Mental health services                                      |
| Orr, M., M. Orr and S. Sankaran (2007)                                                                           | 2.00  | New Zealand     | Emergence-complexity & organization            | Empirical     | IT system implementation                                    |
| O'Sullivan, T. L., C. E. Kuziemsy, D. Toal-Sullivan and W. Cornell (2013)                                        | 22.60 | Canada          | Social science & medicine                      | Empirical     | Public health - health promotion in disaster                |
| Otten, R. and T. Chen (2011)                                                                                     | 1.29  | USA             | Creative nursing                               | Non-empirical | Leadership - nursing - working relationships                |
| Oyeleye, O., P. Hanson, N. O'Connor and D. Dunn (2013)                                                           | 16.80 | USA             | Journal of nursing administration              | Empirical     | Nursing - workplace bullying                                |
| Paley, J. (2007)                                                                                                 | 8.45  | United Kingdom  | Nursing inquiry                                | Non-empirical | Nursing - cardiac rehabilitation                            |

|                                                                                                                                     |        |                |                                                          |               |                                                     |
|-------------------------------------------------------------------------------------------------------------------------------------|--------|----------------|----------------------------------------------------------|---------------|-----------------------------------------------------|
| Paley, J. (2010)                                                                                                                    | 7.13   | United Kingdom | Journal of health services research and policy           | Non-empirical | Healthcare research discipline                      |
| Paley, J. and G. Eva (2011)                                                                                                         | 7.71   | United Kingdom | International journal of nursing studies                 | Non-empirical | Research - academic conceptualisation of healthcare |
| Papadopoulos, M. C., M. Hadjitheodossiou, C. Chrysostomou, C. Hardwidge and B. A. Bell (2001)                                       | 1.65   | United Kingdom | Journal of the royal society of medicine                 | Empirical     | Health care system whole - wait lists for surgery   |
| Parchman, M. L., J. A. Pugh, S. D. Culler, P. H. Noel, N. H. Arar, R. L. Romero and R. F. Palmer (2008)                             | 2.50   | USA            | Implementation science                                   | Non-empirical | Primary care – diabetes                             |
| Patel, A. M., T. M. Sundt 3rd and P. Varkey (2008)                                                                                  | 0.70   | USA            | Minnesota medicine                                       | Non-empirical | Medical practice                                    |
| Patel, V. L., J. Zhang, N. A. Yoskowitz, R. Green and O. R. Sayan (2008)                                                            | 12.70  | USA            | Journal of biomedical informatics                        | Non-empirical | Hospital – decision making - ICU                    |
| Patterson, M. and E. S. Deutsch (2015)                                                                                              | 5.00   | USA            | Current problems in pediatric and adolescent health care | Non-empirical | Safety                                              |
| Pauly, B., M. MacDonald, T. Hancock, W. Martin and K. Perkin (2013)                                                                 | 3.40   | Canada         | Bmc public health                                        | Non-empirical | Public health services                              |
| Peirce, J. C. (2000)                                                                                                                | 0.06   | USA            | Health care management review                            | Non-empirical | Health care organisations                           |
| Pelletier, D., S. Gervais, H. Hafeez-Ur-Rehman, D. Sanou and J. Tumwine (2018)                                                      | 0      | USA            | International journal of health planning and management  | Empirical     | Policy                                              |
| Penney, L. S., L. K. Leykum, P. Noel, E. P. Finley, H. J. Lanham and J. Pugh (2018)                                                 | 0      | USA            | Bmj open                                                 | Non-empirical | Hospital - readmission rates                        |
| Penprase, B. and D. Norris (2005)                                                                                                   | 2.92   | USA            | Nursing leadership forum                                 | Non-empirical | Leadership                                          |
| Perez, B. and A. Liberman (2011)                                                                                                    | 0.14   | USA            | The health care manager                                  | Non-empirical | Decision making                                     |
| Pitkaaho, T., P. Partanen, M. Miettinen and K. Vehvilainen-Julkunen (2015)                                                          | 4.25   | Finland        | Journal of advanced nursing                              | Empirical     | Hospital                                            |
| Piven, M. L., N. Ammarell, D. Bailey, K. Corazzini, C. S. Colon-Emeric, D. Lekan-Rutledge, Q. Utley-Smith and R. A. Anderson (2006) | 2.92   | USA            | Western journal of nursing research                      | Empirical     | Nursing home                                        |
| Plsek, P. E. and T. Greenhalgh (2001)                                                                                               | 110.06 | USA            | Bmj                                                      | Non-empirical | Healthcare – general                                |
| Plsek, P. E. and T. Wilson (2001)                                                                                                   | 41.41  | USA            | Bmj                                                      | Non-empirical | Leadership                                          |

|                                                                                                                          |       |                 |                                                            |               |                                                              |
|--------------------------------------------------------------------------------------------------------------------------|-------|-----------------|------------------------------------------------------------|---------------|--------------------------------------------------------------|
| Pradebon, V. M., A. L. Erdmann, J. L. Leite, S. B. S. de Lima and A. G. Prochnow (2011)                                  | 0.71  | Brazil          | Acta paulista de enfermagem                                | Empirical     | Hospital - paediatric ICU                                    |
| Priesmeyer, H. R. and L. F. Sharp (1995)                                                                                 | 0.61  | USA             | Quality management in health care                          | Non-empirical | Leadership - management administration                       |
| Priesmeyer, H. R., L. F. Sharp, L. Wammack and J. D. Mabrey (1996)                                                       | 0.64  | USA             | Quality management in health care                          | Non-empirical | Clinical pathways and care continuity                        |
| Provost, S. M., H. J. Lanham, L. K. Leykum, R. R. McDaniel and J. Pugh (2015)                                            | 14.00 | USA             | Health care management review                              | Empirical     | Collaboration and teamwork – safety                          |
| Puga, F., K. R. Stevens and D. I. Patel (2013)                                                                           | 1.20  | USA             | Nursing research and practice                              | Empirical     | Hospital - collaborative, transdisciplinary research network |
| Pype, P., D. Krystallidou, M. Deveugele, F. Mertens, S. Rubinelli and I. Devisch (2017)                                  | 2.00  | Belgium         | Patient education and counseling                           | Empirical     | Collaboration and teamwork                                   |
| Quinn, G. R., E. Le, K. Soni, G. Berger, Y. E. Mak and R. Pierce (2014)                                                  | 1.75  | USA             | The joint commission journal on quality and patient safety | Empirical     | Hospital - emergency department                              |
| Ramaswamy, R., J. Reed, N. Livesley, V. Boguslavsky, E. G. Ellorio, S. Sax, D. Houleymata, L. Kimble and G. Parry (2018) | 0     | USA             | International journal for quality in health care           | Non-empirical | Quality improvement                                          |
| Rangachari, P. (2008)                                                                                                    | 1.20  | USA             | Quality management in health care                          | Empirical     | Hospital - quality indicators                                |
| Rantz, M. J., M. K. Flesner and M. Zwygart-Stauffacher (2010)                                                            | 1.75  | USA             | Journal of nursing care quality                            | Non-empirical | Nursing home - quality indicators                            |
| Rantz, M. J., M. Zwygart-Stauffacher, M. Flesner, L. Hicks, D. Mehr, T. Russell and D. Minner (2013)                     | 4.40  | USA             | Journal of the american medical directors association      | Empirical     | Nursing home                                                 |
| Redfern, S. and S. Christian (2003)                                                                                      | 8.67  | United Kingdom  | Journal of evaluation in clinical practice                 | Empirical     | Community and inpatient                                      |
| Reid, J., K. Stone, L. Huang and E. S. Deutsch (2016)                                                                    | 1.00  | USA             | Clinical pediatric emergency medicine                      | Non-empirical | Hospital - safety - paediatric medicine                      |
| Restau, J. and P. Green (2014)                                                                                           | 0     | USA             | Critical care nursing clinics of north america             | Non-empirical | Hospital - ICU - palliative care                             |
| Reynolds, M., E. Sarriot, R. C. Swanson and E. Rusoja (2018)                                                             | 1.00  | United Kingdom  | Journal of evaluation in clinical practice                 | Non-empirical | Health care generally                                        |
| Rhodes, M. G. (2013)                                                                                                     | 1.40  | The Netherlands | International journal of health policy management          | Non-empirical | Health systems                                               |

|                                                                                                                          |       |                |                                                           |                    |                                               |
|--------------------------------------------------------------------------------------------------------------------------|-------|----------------|-----------------------------------------------------------|--------------------|-----------------------------------------------|
| Rhydderch, M., G. Elwyn, M. Marshall and R. Grol (2004)                                                                  | 6.57  | United Kingdom | Quality and safety in health care                         | Non-empirical      | Primary care – indicators                     |
| Ribesse, N., P. Bossyns, B. Marchal, H. Karemere, C. J. Burman and J. Macq (2017)                                        | 1.67  | Belgium        | Global health promotion                                   | Non-empirical      | Health systems reform                         |
| Rice, W. P. (1996)                                                                                                       | 0.09  | USA            | Journal of clinical engineering                           | Unable to classify | Health care generally                         |
| Rickles, D., P. Hawe and A. Shiell (2007)                                                                                | 19.55 | Canada         | Journal of epidemiology and community health              | Non-empirical      | Health care generally                         |
| Righi, A. W., P. Wachs and T. A. Saurin (2012)                                                                           | 1.50  | Brazil         | Work                                                      | Empirical          | Emergency medicine - ambulance                |
| Rogers, H., L. Maher and P. E. Plsek (2008)                                                                              | 1.50  | United Kingdom | Bmj                                                       | Non-empirical      | Health care system                            |
| Rojas-Mendizabal, V., A. Serrano-Santoyo, R. Conte-Galvan, S. Villarreal-Reyes and R. Rivera-Rodriguez (2017)            | 0     | Mexico         | Ingeniería e investigación                                | Non-empirical      | Technology e-health – implementation          |
| Rojas-Mendizabal, V., A. Serrano-Santoyo, R. Conte-Galvan, S. Villarreal-Reyes and R. Rivera-Rodriguez (2017)a           | 0     | Mexico         | Ingeniería e investigación                                | Non-empirical      | E-Health – technology                         |
| Royeen, C. B. and A. J. Luebben (2002)                                                                                   | 0.56  | USA            | Occupational therapy in health care                       | Non-empirical      | Allied health - occupational therapy          |
| Rusoja, E., D. Haynie, J. Sievers, N. Mustafee, F. Nelson, M. Reynolds, E. Sarriot, R. C. Swanson and B. Williams (2018) | 1.00  | USA            | Journal of evaluation in clinical practice                | Review             | Research - complexity science in healthcare   |
| Santos, F. A. P. S. d., B. C. Enders, V. E. P. Santos, D. N. A. Dantas and L. S. M. V. d. Miranda (2016)                 | 0     | Brazil         | Escola anna nery                                          | Non-empirical      | Health system - obstetric care                |
| Sargeant, J. (2009)                                                                                                      | 16.56 | Canada         | Journal of continuing education in the health professions | Non-empirical      | Education - interprofessional education       |
| Sarriot, E. and M. Kouletio (2015)                                                                                       | 6.33  | USA            | Systemic practice and action research                     | Non-empirical      | Health system - sustainability                |
| Schneider, H., R. English, H. Tabana, T. Padayachee and M. Orgill (2014)                                                 | 3.50  | South Africa   | Bmc health services research                              | Empirical          | Health system - primary care - implementation |
| Schoo, A. and K. Kumar (2018)                                                                                            | 0     | Australia      | The clinical teacher                                      | Non-empirical      | Education                                     |



|                                                                                                                |      |                 |                                                   |                    |                                         |
|----------------------------------------------------------------------------------------------------------------|------|-----------------|---------------------------------------------------|--------------------|-----------------------------------------|
| Schulz, V. M., A. M. Crombeen, D. Marshall, J. Shadd, K. A. LaDonna and L. Lingard (2017)                      | 1.00 | Canada          | Journal of pain and symptom management            | Empirical          | Heart failure                           |
| Scott, K. and A. Steinbinder (2009)                                                                            | 0.22 | USA             | Nursing administration quarterly                  | Unable to classify | Change and improvement                  |
| Scott, K. and J. Van Norman (2009)                                                                             | 1.11 | USA             | Nursing administration quarterly                  | Unable to classify | EHR implementation                      |
| Sharp, L. F. and H. R. Priesmeyer (1995)                                                                       | 1.43 | USA             | Quality management in health care                 | Non-empirical      | Health care organisations - generally   |
| Shen, W., L. Jiang, M. Zhang, Y. Ma, G. Jiang and X. He (2014)                                                 | 0.75 | China           | Chinese medical journal                           | Non-empirical      | Research - mass casualty incidents      |
| Shirey, M. R., P. R. Ebright and A. M. McDaniel (2013)                                                         | 7.60 | USA             | Journal of nursing management                     | Empirical          | Leadership - nursing - decision making  |
| Silva, I. R., A. M. T. Gomes, G. V. Valadares, N. L. P. dos Santos, T. P. da Silva and J. L. Leite (2015)      | 1.33 | Brazil          | Revista gaucha de enfermagem                      | Empirical          | Nursing - knowledge of aids/std         |
| Silva, Í. R., J. L. Leite, M. A. Trevizan, I. A. C. Mendes, T. P. d. Silva and S. M. d. S. B. Lins (2017)      | 0    | Brazil          | Escola anna nery                                  | Empirical          | Education - nursing                     |
| Silva, O., E. D. Alves and M. C. S. Rodrigues (2014)                                                           | 0.50 | Brazil          | Cultura de los cuidados                           | Empirical          | Nursing - education                     |
| Simmons, M. (2003)                                                                                             | 0.80 | United Kingdom  | Journal of hospital infection                     | Non-empirical      | Management of communicable diseases     |
| Simpson, K. M., K. Porter, E. S. McConnell, C. Colón-Emeric, K. A. Daily, A. Stalzer and R. A. Anderson (2013) | 6.80 | USA             | Implementation science                            | Non-empirical      | Implementation/improvement              |
| Sims, T. (2014)                                                                                                | 0    | USA             | Creative nursing                                  | Unable to classify | Pregnancy                               |
| Singh, R., J. Hickner, J. Mold and G. Singh (2014)                                                             | 1.75 | USA             | Journal of patient safety                         | Empirical          | Primary health care - testing processes |
| Singh, R., T. Servoss, M. Kalsman, C. Fox and G. Singh (2004)                                                  | 3.64 | USA             | Informatics in primary care                       | Empirical          | Primary care                            |
| Smit, E. H. and J. J. L. Derksen (2015)                                                                        | 0.33 | The Netherlands | Nonlinear dynamics, psychology, and life sciences | Non-empirical      | Primary care - psychologists            |
| Smit, E. H. D. and J. J. L. J. Derksen (2017)                                                                  | 0    | The Netherlands | Europe's journal of psychology                    | Empirical          | Primary care - psychology               |



|                                                                                                                      |       |                 |                                                            |               |                                                     |
|----------------------------------------------------------------------------------------------------------------------|-------|-----------------|------------------------------------------------------------|---------------|-----------------------------------------------------|
| Smith, C. S., C. Francovich, M. Morris, W. Hill, F. Langlois-Winkle, R. Rupper, C. Roth, S. Wheeler and A. Vo (2010) | 1.13  | USA             | Advances in health sciences education                      | Non-empirical | Education                                           |
| Smith, H., C. Kuziemyky and C. Champion (2018)                                                                       | 0     | Canada          | Canadian journal of surgery                                | Non-empirical | Hospital - surgery - physician extender             |
| Smits, S. J., J. A. Falconer, R. Morland and D. C. Strasser (1997)                                                   | 0.24  | USA             | Topics in stroke rehabilitation                            | Non-empirical | Rehabilitation - stroke                             |
| Snoeren, M. M. W. C., B. M. Janssen, T. J. H. Niessen and T. A. Abma (2016)                                          | 6.50  | The Netherlands | Health care analysis                                       | Empirical     | Nursing home - patient centredness - culture change |
| Soliman, M. and T. A. Saurin (2017)                                                                                  | 4.00  | Brazil          | Journal of manufacturing systems                           | Review        | Lean management                                     |
| Soubhi, H., E. A. Bayliss, M. Fortin, C. Hudon, M. van den Akker, R. Thivierge, N. Posel and D. Fleischer (2010)     | 11.75 | Canada          | Annals of family medicine                                  | Non-empirical | Primary care                                        |
| Squires, A., S. J. Uyei, H. Beltran-Sanchez and S. A. Jones (2016)                                                   | 2.00  | USA             | Human resources for health                                 | Empirical     | Health care workforce - health systems              |
| Ssengooba, F., B. McPake and N. Palmer (2012)                                                                        | 15.50 | Uganda          | Social science & medicine                                  | Empirical     | Performance targets - health systems                |
| Stange, K. C. (2009)                                                                                                 | 7.78  | USA             | Annals of family medicine                                  | Non-empirical | Primary care - reform                               |
| Stange, K. C. (2011)                                                                                                 | 1.86  | USA             | American journal of preventive medicine                    | Non-empirical | Preventive health                                   |
| Sterns, S., S. C. Miller and S. Allen (2010)                                                                         | 6.50  | USA             | Journal of the american medical directors association      | Empirical     | Nursing home - culture change                       |
| Strand, R., G. Rortveit and E. Schei (2004)                                                                          | 1.43  | Norway          | Complexus                                                  | Non-empirical | Medical practice                                    |
| Stroebel, C. K., R. R. McDaniel Jr, B. F. Crabtree, W. L. Miller, P. A. Nutting and K. C. Stange (2005)              | 15.69 | USA             | The joint commission journal on quality and patient safety | Non-empirical | Primary care - quality improvement                  |
| Sturmberg, J. P. (2007)                                                                                              | 3.27  | Australia       | Australian family physician                                | Non-empirical | Clinical generally                                  |
| Sturmberg, J. P. (2007)                                                                                              | 1.09  | Australia       | Australian family physician                                | Non-empirical | Primary care - research                             |
| Sturmberg, J. P. and P. Cilliers (2009)                                                                              | 3.89  | Australia       | Journal of evaluation in clinical practice                 | Non-empirical | Health care systems and practice generally          |
| Sturmberg, J. P., C. M. Martin and D. A. Katerndahl (2014)                                                           | 20.25 | Australia       | Annals of family medicine                                  | Review        | Primary care                                        |
| Sweeney, K. G. and R. Mannion (2002)                                                                                 | 1.63  | United Kingdom  | British journal of general practice                        | Non-empirical | Clinical governance                                 |

|                                                                                                                                                                                      |       |                |                                                 |               |                                                        |
|--------------------------------------------------------------------------------------------------------------------------------------------------------------------------------------|-------|----------------|-------------------------------------------------|---------------|--------------------------------------------------------|
| Tait, G. L. R., J. Bates, K. A. LaDonna, V. N. Schulz, P. H. Strachan, A. McDougall and L. Lingard (2015)                                                                            | 5.33  | Canada         | Journal of multidisciplinary healthcare         | Empirical     | Heart failure                                          |
| Tan, J., H. J. Wen and N. Awad (2005). "Health care and services delivery systems as complex adaptive systems." Communications of the Acm 48(5): 36-44                               | 11.23 | USA            | Communications of the acm                       | Non-empirical | Health care generally - service delivery system        |
| Tang, W. X., L. Wei and L. Zhang (2017)                                                                                                                                              | 0     | China          | International journal of integrated care        | Empirical     | Health system - health care reform for integrated care |
| Taylor, E., A. J. Card and M. Piatkowski (2018)                                                                                                                                      | 0     | USA            | Health environments research & design journal   | Review        | Hospital - patient room                                |
| Therrien, M. C., J. M. Normandin and J. L. Denis (2017)                                                                                                                              | 0     | Canada         | Journal of health organization and management   | Non-empirical | Hospital and wider health system                       |
| this ref is actually the Sturmberg, O'Halloran, Martin (2012) reference above they missed an author when referencing - line 532). Still missed in our library but please consolidate | 11.00 | Canada         | International journal of integrated care        | Empirical     | Integrated care                                        |
| Thomas, M. B. and S. Houston (2005)                                                                                                                                                  | 0.85  | USA            | Clinical nurse specialist                       | Non-empirical | Patient safety                                         |
| Thompson, D. S., J. Abourbih, L. Carter, G. Adams-Carpino, S. Berry, L. E. Graves and N. J. Ranger (2018)                                                                            | 0     | Canada         | Journal of interprofessional care               | Empirical     | Education - interprofessionalism                       |
| Thompson, D. S., X. Fazio, E. Kustra, L. Patrick and D. Stanley (2016)                                                                                                               | 14.00 | Canada         | Bmc health services research                    | Review        | Research - complexity science in healthcare            |
| Townsend, G. C., M. Kim and D. Sankey (2012)                                                                                                                                         | 2.17  | Australia      | European journal of dental education            | Non-empirical | Education - dentistry - problem-based learning         |
| Trenholm, S. and E. Ferlie (2013)                                                                                                                                                    | 5.00  | United Kingdom | Social science & medicine                       | Empirical     | Health system - response to disease                    |
| Valencia A, M. (2011)                                                                                                                                                                | 2.14  | Colombia       | Revista facultad nacional de salud pública      | Non-empirical | Public health                                          |
| Valeras, A., Gunn, W., and A. Valeras (2013)                                                                                                                                         | 0.40  | USA            | International journal of psychiatry in medicine | Non-empirical | Education                                              |
| Vallis, M. (2015)                                                                                                                                                                    | 4.33  | Canada         | Canadian journal of diabetes                    | Non-empirical | Diabetes management                                    |
| Van Beurden, E. K., A. M. Kia, A. Zask, U. Dietrich and L. Rose (2013)                                                                                                               | 7.71  | Australia      | Health promotion international                  | Non-empirical | Health promotion                                       |

|                                                                                        |      |                 |                                            |               |                                                                |
|----------------------------------------------------------------------------------------|------|-----------------|--------------------------------------------|---------------|----------------------------------------------------------------|
| van de Wetering, R. and R. Batenburg (2014)                                            | 5.50 | The Netherlands | Journal of digital imaging                 | Empirical     | Hospital - IT                                                  |
| van der Vlegel-Brouwer, W. (2013)                                                      | 2.20 | The Netherlands | International journal of integrated care   | Non-empirical | Integrated care - policy-practice gap                          |
| van Rossum, T. R., F. Scheele, A. Scherpbier, H. E. Sluiter and I. C. Heyligers (2016) | 1.50 | The Netherlands | Bmc medical education                      | Non-empirical | Education - medicine                                           |
| van Wietmarschen, H. A., H. M. Wortelboer and J. van der Greef (2018)                  | 4.00 | The Netherlands | Journal of evaluation in clinical practice | Non-empirical | Health care generally                                          |
| Varghese, J., V. R. Kutty, L. Paina and T. Adam (2014)                                 | 4.75 | India           | Health research policy and systems         | Empirical     | Public health - vaccination coverage                           |
| Velde, B. P., A. G. Greer, D. C. Lynch and S. Escott-Stump (2002)                      | 0.69 | USA             | Journal of allied health                   | Non-empirical | Education                                                      |
| Velez Lapao, L. (2007)                                                                 | 3.09 | Portugal        | Methods of information in medicine         | Empirical     | Information/IT systems                                         |
| Vicenzi, A. E. (1994)                                                                  | 1.08 | USA             | Nursing science quarterly                  | Non-empirical | Nursing                                                        |
| Vieira, M., P. Klock, R. Costa and A. L. Erdmann (2009)                                | 0.33 | Colombia        | Aquichan                                   | Non-empirical | Nursing profession                                             |
| Vogt, E. M. (2002)                                                                     | 0.94 | USA             | Drug safety                                | Non-empirical | Medication safety                                              |
| Vosman, F. and A. Niemeijer (2017)                                                     | 4.00 | The Netherlands | Medicine, health care and philosophy       | Non-empirical | Hospital - health care                                         |
| Walls, M. E. and R. R. McDaniel, Jr. (1999)                                            | 0.53 | USA             | Seminars for nurse managers                | Non-empirical | Mergers - leadership - organisational change, nurse management |
| Walton, M. (2016)                                                                      | 2.50 | New Zealand     | Evidence and policy                        | Non-empirical | Public health - governance/policy                              |

|    |                                                                       |       |                 |                                                    |                                                                   |
|----|-----------------------------------------------------------------------|-------|-----------------|----------------------------------------------------|-------------------------------------------------------------------|
| 1  |                                                                       |       |                 |                                                    |                                                                   |
| 2  |                                                                       |       |                 |                                                    |                                                                   |
| 3  |                                                                       |       |                 |                                                    |                                                                   |
| 4  |                                                                       |       |                 |                                                    |                                                                   |
| 5  | Wang, L., X. Zhang, X. Liang and G. Bloom (2016)                      | 2.00  | China           | Globalization and health                           | Empirical                                                         |
| 6  |                                                                       |       |                 |                                                    | Health care policy - global health system - antibiotic resistance |
| 7  |                                                                       |       |                 |                                                    |                                                                   |
| 8  |                                                                       |       |                 |                                                    |                                                                   |
| 9  | West, G. B. (2012)                                                    | 8.00  | United Kingdom  | The lancet                                         | Non-empirical                                                     |
| 10 |                                                                       |       |                 |                                                    | Medicine                                                          |
| 11 | West, G. B. (2012)a                                                   | 8.00  | USA             | The lancet                                         | Non-empirical                                                     |
| 12 |                                                                       |       |                 |                                                    | Medicine                                                          |
| 13 | Wilkinson, J., M. Goff, E. Rusoja, C. Hanson and R. C. Swanson (2017) | 1.00  | USA             | Journal of evaluation in clinical practice         | Review                                                            |
| 14 |                                                                       |       |                 |                                                    | Health systems, generally                                         |
| 15 |                                                                       |       |                 |                                                    |                                                                   |
| 16 | Wilson, J. (2014)                                                     | 1.75  | United Kingdom  | Monash bioethics review                            | Non-empirical                                                     |
| 17 |                                                                       |       |                 |                                                    | Translation - evidence into practice - bioethics                  |
| 18 |                                                                       |       |                 |                                                    |                                                                   |
| 19 |                                                                       |       |                 |                                                    |                                                                   |
| 20 | Wilson, N. J. and M. J. Hatlie (2001)                                 | 0.59  | USA             | Journal of healthcare quality                      | Non-empirical                                                     |
| 21 |                                                                       |       |                 |                                                    | Patient safety                                                    |
| 22 |                                                                       |       |                 |                                                    |                                                                   |
| 23 | Wilson, T., T. Holt and T. Greenhalgh (2001)                          | 28.06 | United Kingdom  | Bmj                                                | Non-empirical                                                     |
| 24 |                                                                       |       |                 |                                                    | Clinical - general                                                |
| 25 |                                                                       |       |                 |                                                    |                                                                   |
| 26 | Wouters, E. F. M. and I. M. L. Vanderhoven (2009)                     | 0.56  | The Netherlands | Seminars in respiratory and critical care medicine | Non-empirical                                                     |
| 27 |                                                                       |       |                 |                                                    | Integrated care - chronic disease                                 |
| 28 |                                                                       |       |                 |                                                    |                                                                   |
| 29 | Zarowsky, C., S. Haddad and V.-K. Nguyen (2013)                       | 3.60  | South Africa    | Global health promotion                            | Non-empirical                                                     |
| 30 |                                                                       |       |                 |                                                    | Vulnerable groups in healthcare                                   |
| 31 | Zhao, J., H. Yang, H. Guo, Y. Li, Z. Zhang and S. Li (2010)           | 0     | China           | Shengwu yixue gongchengxue zazhi                   | Unable to classify                                                |
| 32 |                                                                       |       |                 |                                                    | Hospital                                                          |
| 33 |                                                                       |       |                 |                                                    |                                                                   |
| 34 | Zimmerman, B. (1999)                                                  | 3.21  | Canada          | Healthcare forum journal                           | Non-empirical                                                     |
| 35 |                                                                       |       |                 |                                                    | Uncertainty - leadership                                          |
| 36 |                                                                       |       |                 |                                                    |                                                                   |
| 37 |                                                                       |       |                 |                                                    |                                                                   |
| 38 |                                                                       |       |                 |                                                    |                                                                   |
| 39 |                                                                       |       |                 |                                                    |                                                                   |
| 40 |                                                                       |       |                 |                                                    |                                                                   |
| 41 |                                                                       |       |                 |                                                    |                                                                   |
| 42 |                                                                       |       |                 |                                                    |                                                                   |
| 43 |                                                                       |       |                 |                                                    |                                                                   |
| 44 |                                                                       |       |                 |                                                    |                                                                   |
| 45 |                                                                       |       |                 |                                                    |                                                                   |
| 46 |                                                                       |       |                 |                                                    |                                                                   |
| 47 |                                                                       |       |                 |                                                    |                                                                   |

# BMJ Open

## The influence of complexity: A bibliometric analysis of complexity science in healthcare

|                                 |                                                                                                                                                                                                                                                                                                                                                                                                                                                                                                                                                                                                                                                                                                                                        |
|---------------------------------|----------------------------------------------------------------------------------------------------------------------------------------------------------------------------------------------------------------------------------------------------------------------------------------------------------------------------------------------------------------------------------------------------------------------------------------------------------------------------------------------------------------------------------------------------------------------------------------------------------------------------------------------------------------------------------------------------------------------------------------|
| Journal:                        | <i>BMJ Open</i>                                                                                                                                                                                                                                                                                                                                                                                                                                                                                                                                                                                                                                                                                                                        |
| Manuscript ID                   | bmjopen-2018-027308.R1                                                                                                                                                                                                                                                                                                                                                                                                                                                                                                                                                                                                                                                                                                                 |
| Article Type:                   | Research                                                                                                                                                                                                                                                                                                                                                                                                                                                                                                                                                                                                                                                                                                                               |
| Date Submitted by the Author:   | 08-Jan-2019                                                                                                                                                                                                                                                                                                                                                                                                                                                                                                                                                                                                                                                                                                                            |
| Complete List of Authors:       | Churruca, Kate; Macquarie University, Australian Institute of Health Innovation, Centre for Healthcare Resilience and Implementation Science Pomare, Chiara; Macquarie University, Australian Institute of Health Innovation, Centre for Healthcare Resilience and Implementation Science Ellis, Louise A.; Macquarie University, Australian Institute of Health Innovation, Centre for Healthcare Resilience and Implementation Science Long , Janet; Macquarie University, Australian Institute of Health Innovation, Centre for Healthcare Resilience and Implementation Science Braithwaite, Jeffrey; Macquarie University, Australian Institute of Health Innovation, Centre for Healthcare Resilience and Implementation Science |
| <b>Primary Subject Heading</b>: | Health services research                                                                                                                                                                                                                                                                                                                                                                                                                                                                                                                                                                                                                                                                                                               |
| Secondary Subject Heading:      | Research methods, Medical publishing and peer review                                                                                                                                                                                                                                                                                                                                                                                                                                                                                                                                                                                                                                                                                   |
| Keywords:                       | Health & safety < HEALTH SERVICES ADMINISTRATION & MANAGEMENT, HEALTH SERVICES ADMINISTRATION & MANAGEMENT, Health policy < HEALTH SERVICES ADMINISTRATION & MANAGEMENT                                                                                                                                                                                                                                                                                                                                                                                                                                                                                                                                                                |
|                                 |                                                                                                                                                                                                                                                                                                                                                                                                                                                                                                                                                                                                                                                                                                                                        |

SCHOLARONE™  
Manuscripts

1  
2  
3  
4  
5  
6  
7  
8  
9  
10  
11  
12  
13  
14  
15  
16  
17  
18  
19  
20  
21  
22  
23  
24  
25  
26  
27  
28  
29  
30  
31  
32  
33  
34  
35  
36  
37  
38  
39  
40  
41  
42  
43  
44  
45  
46  
47  
48  
49  
50  
51  
52  
53  
54  
55  
56  
57  
58  
59  
60

**The influence of complexity:  
A bibliometric analysis of complexity science in healthcare**

**Authors**

Kate Churruca<sup>1</sup>, Chiara Pomare<sup>1</sup>, Louise A Ellis<sup>1</sup>, Janet C Long<sup>1</sup>, Jeffrey Braithwaite<sup>1</sup>

**Author Affiliations**

<sup>1</sup> Centre for Healthcare Resilience and Implementation Science, Australian Institute of Health Innovation, Macquarie University, Australia

**Corresponding author**

Dr Kate Churruca

Centre for Healthcare Resilience and Implementation Science, Australian Institute of Health Innovation, Macquarie University

Level 6, 75 Talavera Rd, Macquarie University,

NSW 2109 Australia

Email: [Kate.churruca@mq.edu.au](mailto:Kate.churruca@mq.edu.au)

Phone: +61 2 9850 2485

**Word count**

4,251

## ABSTRACT

### Objectives

To analyse trends in the academic literature applying complexity science to healthcare, focusing specifically on bibliometric characteristics and indicators of influence.

### Design

This study reports a bibliometric analysis via a systematic search of the academic literature applying complexity science to healthcare.

### Method

A search of four academic databases was performed on 19 April 2018. Articles details were downloaded and screened against inclusion criteria (peer-reviewed journal articles applying complexity science to healthcare). Publication and content data were then collected from included articles, with analysis focusing on trends over time in the types and topics of articles, and where they are published. We also analysed the influence of this body of work through citation and network analyses.

### Results

Articles on complexity science in healthcare were published in 268 journals, though a much smaller subset were responsible for a substantial proportion of this literature. The United States contributed the largest number of articles, followed by the United Kingdom, Canada, and Australia. Over time, the number of empirical and review articles increased, relative to non-empirical contributions. However, in general, non-empirical literature were more influential, with a series of introductory conceptual papers being the most influential based on both overall citations and their use as index references within a citation network. The most common topics of focus were health systems and organisations generally, and education, with recent uptake in research, policy, and change and improvement.

### Conclusions

This study identified changes in the types of articles on complexity science in healthcare published over time, and their content. There was evidence to suggest a shift from conceptual work to the application of concrete improvement strategies and increasingly in-depth examination of complex healthcare systems. We also identified variation in the influence of this literature at article-level, and to a lesser extent by topic of focus.

### Key words

Complexity science, Healthcare, Bibliometrics, Review, Complex adaptive systems, Health care



## ARTICLE SUMMARY

### Strengths and limitations of this study

- Use of an inclusive search strategy based on previously published reviews and including non-empirical and non-English language articles.
- Articles coded by multiple coders into topic themes to determine popular and emerging areas of interest for complexity science in healthcare.
- A focus on citations and index references as a proxy for influence; citation analysis tends to prioritise older contributions that have had more time to accumulate cites.
- Inclusion of only peer-reviewed articles, minimizing the potential influence of some prominent non-peer-reviewed contributions.

# The influence of complexity: A bibliometric analysis of complexity science in healthcare

## BACKGROUND

Complexity science provides a way of understanding nonlinearity, in which causation is problematic and multi-faceted, and emergent behaviours are the norm.[1] It developed out of diverse academic traditions, including computer science, physics, sociology, anthropology, economics and mathematics. Different systems can be understood using the complexity paradigm—it finds commonalities and patterns in the behaviour of systems comprised of very different agents (ants, cells, humans, societies, species, bacteria), often labelled via a convenient phrase: complex adaptive systems (CASs).[2] Such systems were initially recognised for displaying “weird”, chaotic and dynamic behaviours; thus, chaos theory was developed to explain such phenomenon. However, a focus only on chaos failed to account for why complex systems also often exhibit degrees of homeostasis—that is, they are somehow balanced between the chaotic and unpredictable on the one hand, and the orderly and predictable on the other—for the most part, most of the time.[3] Complexity science provides an understanding of systems that are between phase transitions and are often found just “at the edge of chaos”. [3, 1]

The study of complexity challenges traditional approaches to science that favour a controlled view of the world, where variables are held constant and where outcomes are predictable because causes and effects are related, and construed as linear arrangements.[4] CASs are not well-explained through studies that aim for such reduction, decomposition and cause-effect logic, breaking problems down into manageable parts and studying these components individually in an attempt to understand the whole.[5] In short, CASs are *different from*, and *more than* the sum of their parts.

Complexity science has pervaded many disciplines, making its way, for example, into the social sciences and the study of human systems and organisations.[6, 1] The adoption of complexity science principles has been particularly notable in health-related fields, with healthcare systems worldwide recognised as excellent examples of CASs because of the diverse array of agents involved (doctors, patients, nurses, consumer groups, politicians, non-government organisations) and the enormous number of interactions among them.[7, 8] This work gained momentum at the beginning of this century, with the publication of a number of conceptual contributions discussing the application of complexity science principles in areas of healthcare like clinical practice,[9] education,[10] and healthcare management.[11, 12] Since this time, the potential of complexity science in understanding and tackling some of the otherwise intractable challenges of delivering

1 healthcare—including patient safety,[13] interprofessional collaboration,[14] sustained  
2 improvement,[15] and managing uncertainty [16]—has been considered. Empirical studies applying  
3 the principles of complexity science to healthcare have also proliferated. Almost two decades ago,  
4 Anderson and McDaniel [17] used complexity theory to understand nurses' decision-making in  
5 nursing homes in the United States. Much more recently, Barasa, Molyneux [18] examined  
6 hospitals as CASs in their case study of financing decisions in Kenya.  
7  
8  
9  
10  
11  
12

13  
14 There are signs that literature on complexity science in healthcare is approaching maturity, with  
15 literature reviews of the empirical research now being undertaken,[19] especially in the context of  
16 health services interventions,[20] as well as publication of a systematic review of empirical and  
17 non-empirical complexity ideas.[21] As a complement to these contributions, now is an appropriate  
18 time to examine the influence and spread of this literature in greater prevision. Towards this end,  
19 bibliometrics is an approach that looks at publication patterns in an area of research literature,  
20 including trends over time and globally, and the influence of articles, and the authors and journals  
21 publishing such works, indicated by citations.  
22  
23  
24  
25  
26  
27  
28

## 29 **Aim**

30 This study aimed to analyse trends in the academic literature on applying complexity science to  
31 healthcare, focusing specifically on bibliometric characteristics. We also analysed the influence of  
32 this body of work through citation and network analyses.  
33  
34  
35  
36  
37

## 38 **METHOD**

### 39 **Systematic search of the literature**

#### 40 **Databases**

41 On the 19 April 2018, the Cochrane Database of Systematic Reviews, CINAHL, EMBASE, and all  
42 databases of Web of Science, which includes MEDLINE, were searched using keywords  
43 documented below. The general search strategy was based on that taken by Thompson et al.,[19]  
44 with a range of search terms associated with complexity theory used to account for broad indexing.  
45 This included “chaos theory”, because complexity is often described as developing out of,[1] as  
46 well as encompassing the more specific concept of, chaos.[22] Keywords related to healthcare and  
47 health systems were also searched. No date restrictions were used. An example of the search  
48 strategy for Web of Science is in Appendix 1.  
49  
50  
51  
52  
53  
54  
55  
56  
57

#### 58 **Keywords**

1. “Complexity theory” OR “complexity science” OR “complex adaptive system” OR “complexity thinking” OR “complex responsive process theory” OR “chaos theory”
2. healthcare OR “health care” OR “health-care” OR hospital OR “health facilit\*” OR “acute care” OR “health organi\*” OR “health system” OR “primary care” OR “general practice” OR “aged care” OR “nurs\* home OR medic\* OR clinic\* OR nurs\* OR health

Citations returned from these searches were downloaded into the reference management software Endnote, and duplicates were removed. References were then exported to a Microsoft Excel spreadsheet for screening. Articles were reviewed against inclusion criteria and exclusion criteria by the first author, with a consistency check on 5% of the references performed by a second author following accepted practices.[23] References meeting inclusion criteria were classified for bibliometric analysis.

### Inclusion and exclusion criteria

Because we were looking at influence, empirical and non-empirical papers (e.g., commentaries, conceptual papers and reviews) published in peer-reviewed academic journals and applying complexity science to healthcare were included in the analysis. We defined healthcare broadly to include not only the professionals involved (e.g., nurses, doctors, administrators) and sites of healthcare delivery (e.g., hospitals, nursing homes), but also education, policy, processes and ethical or research issues related to healthcare. Health promotion and public health articles were initially retained for full-text screening. However, they were ultimately only included if they discussed healthcare sites, professions or aspects of care delivery, rather than, for example, population-based health promotion interventions and issues.

Letters to the editor and editorial papers that only described the contents of an issue were excluded, because they were not thought to sufficiently contribute to the spread of complexity ideas within healthcare. Books, book chapters and conference proceedings were also excluded because bibliometric data is often not available or incomplete for such publications. Articles that were not originally published in English but provided an English-language abstract were included in the bibliometric review if, based on this information, they were found to meet all of the inclusion criteria and none of the exclusion criteria.

### Bibliometric analysis

#### Stage one: Review of article publication data

First bibliometric data on the article, including the year of publication, the journal in which it was published, the corresponding author and their country of residence, were captured from the full-text,

1  
2 or the journal or indexing database where full-text was unavailable (either inaccessible to the  
3 authors or not available in English).  
4

## 5 6 7 Stage two: Review of article content 8

9 Articles were then classified in greater detail according to their content, including type of article and  
10 focus. This involved classifying articles as empirical or non-empirical. The empirical papers were  
11 further categorized according to their use of complexity science (e.g., the covered aspects of  
12 prediction, conceptual framework, data analysis, or interpretation of findings) following the schema  
13 of Thompson et al.[19] Non-empirical papers were classified as: commentaries and editorials,  
14 conceptual discussions, conceptual case studies, and protocols. Reviews were also included and  
15 classified.  
16  
17  
18  
19  
20  
21  
22

23 Two of the authors (KC and CP) performed a content analysis on the main focus(es) of all the  
24 included articles. This involved inductive descriptive coding of each paper, then comparisons,  
25 modifications and expansions of codes to identify the most common topic themes in the literature  
26 applying complexity science to healthcare. Generally, details in the abstract and title, in addition to  
27 database indexing information, were sufficient to classify whether an article was empirical or non-  
28 empirical, and also its main focus. However, some articles did not have an abstract, or the abstract  
29 detail was insufficient. Full-text review was conducted during this stage (where full-text was  
30 available in English) to ensure the most accurate classification.  
31  
32  
33  
34  
35  
36  
37  
38

## 39 Stage three: Analysis of influence

40 The number of citations an article had received over time was used to calculate influence, with  
41 citations collected from Google Scholar in July 2018. We also examined influence by identifying  
42 one or more “index” reference(s) for each of the full-text articles reviewed.<sup>1</sup> An index was defined  
43 as the most influential, prominent or leading reference(s) cited by an included article that also  
44 focused on complexity science within healthcare (as compared with complexity science in biology,  
45 management or generally). However, unlike papers in this review, an index reference need not be a  
46 peer-reviewed publication; this criterion allowed us to consider influence from other sorts of  
47 academic outputs. Where possible, we identified an index reference based on attribution by the  
48 authors of that paper, for example, a statement like: “In his appendix to *Crossing the Quality*  
49 *Chasm*,<sup>12</sup> Plsek<sup>13</sup> suggests that, rather than using the principles of mechanical systems to try to  
50 improve health care, innovators should employ the principles of complex adaptive systems”.<sup>[24, p.</sup>  
51  
52  
53  
54  
55  
56  
57  
58  
59  
60

---

<sup>1</sup> Where full-text was available (n=377)

1  
2 17] However, in the absence of an explicit statement to this effect, we took the first reference(s)  
3 cited when introducing the notion of complexity science applied to healthcare. Some articles  
4 included did not have index references, and others were unable to be searched (i.e., full-text not  
5 available).  
6  
7  
8  
9

10 Index references and their citing articles were used in a network analysis, visually constructed in  
11 Gephi, version 0.9.2. Network analysis uses graph theory to map and measure relationships among  
12 nodes.[25] In this case, the nodes in the network were the articles in the review as well as any index  
13 reference(s) they cited, while relationships were directional tie(s) to an index reference (e.g. articles  
14 X cited article Y as an index reference). Articles that did not cite an index reference, and were not  
15 themselves used as an index reference for another article (i.e., an isolate), were removed from the  
16 network analysis, on the basis that they did not contribute to understanding influence. In visualizing  
17 the network, the main topic theme of the research output was used to differentiate different  
18 categories of articles and identify any possible clustering, as well as distinguish influential index  
19 references that were not captured by our review strategy. The most influential academic outputs in  
20 the network were assessed using in-degree calculation (the number of inward directed ties to a node  
21 i.e., the number of times an index reference was cited by other articles).  
22  
23  
24  
25  
26  
27  
28  
29  
30  
31  
32

### 33 **Patient and public involvement**

34 Neither patients nor members of the public were involved in this study.  
35  
36  
37

## 38 **RESULTS**

39 A total of 2,505 articles were returned from searches across the four databases and downloaded into  
40 Endnote X8. Following removal of duplicates, citation details (n=2,382) were exported to Microsoft  
41 Excel for screening of their titles and abstracts against inclusion criteria by the first author. To  
42 ensure the criteria were clear and could be applied consistently, a second author (LAE) screened a  
43 subset (5%) of the library. Interrater reliability (Cohen's kappa) between the two authors indicated  
44 almost perfect agreement ( $\kappa=0.88$ ).[26] Five-hundred and forty-seven references were retained,  
45 though a further 93 were excluded at stages one and two of data analysis because, upon review, they  
46 did not meet inclusion criteria (reasons documented in Table 1). This left 454 articles that were  
47 subjected to the bibliometric analysis. Figure 1 presents the search strategy.  
48  
49  
50  
51  
52  
53  
54  
55  
56  
57

58 INSERT FIGURE 1 HERE  
59  
60

**Table 1. Reasons for exclusion at full text stage.**

| Reason for exclusion                                | Number of articles |
|-----------------------------------------------------|--------------------|
| Not about complexity science                        | 12                 |
| Not in healthcare                                   | 31                 |
| Not a peer-reviewed academic journal article        | 49                 |
| Article information unable to be found <sup>1</sup> | 1                  |
| Total                                               | 93                 |

<sup>1</sup> Rouse, W. B. (2000). Managing complexity: disease control as a complex adaptive system. *Information Knowledge Systems Management*, 2(2), 143-165 was published in a now discontinued journal. Citation data unavailable in Google Scholar, precluding bibliometric analysis.

Of the 454 articles considered eligible for inclusion, the research team was able to access full-text in English for 379 articles, permitting a more detailed and accurate classification of content. The remaining 75 articles included in the bibliometric analysis were comprised of 49 articles in English-language journals where full-text was inaccessible, and 26 where full-text was not available in English. See Appendix 2 for summary of data extraction.

### Stage one results: Article publication data

The 454 included articles came from 268 different journals, which were primarily health-focused, but varied in scope. Table 2 displays the journals publishing the highest number of articles in the field. The journal publishing the most articles on complexity science applied to healthcare was the *Journal of Evaluation in Clinical Practice* (n=24), followed by *Health Care Management Review* (n=18), and *Social Science & Medicine* (n=11).

**Table 2. Top 13 journals publishing articles on complexity science applied to healthcare**

| Top journals publishing on complexity science in healthcare | Number of articles |
|-------------------------------------------------------------|--------------------|
| Journal of Evaluation in Clinical Practice                  | 24                 |
| Health Care Management Review                               | 18                 |
| Social Science & Medicine                                   | 11                 |
| BMC Health Services Research                                | 8                  |
| Implementation Science                                      | 8                  |
| Journal of Advanced Nursing                                 | 8                  |
| Medical Education                                           | 8                  |
| Annals of Family Medicine                                   | 6                  |
| Academic Medicine                                           | 5                  |
| BMJ                                                         | 5                  |



|                                          |   |
|------------------------------------------|---|
| International Journal of Integrated Care | 5 |
| Journal of Interprofessional Care        | 5 |
| Journal of Nursing Administration        | 5 |

Using the corresponding author's affiliation as an indicator, we determined that articles applying complexity science principles to healthcare came from 33 countries. The United States of America (n=199, 43.8%), the United Kingdom (n=82, 18.1%), Canada (n=49, 10.8%) and Australia (n=23, 5.1%) accounted for nearly three-quarters of the included papers, as can be seen from Figure 2. Other countries contributing substantially were the Netherlands (n=12, 2.6%) and Brazil (n=17, 3.7%); for Brazil, this included 11 (2.4%) papers published in non-English language journals. Despite the concentration of articles among only a few countries, there was evidence for increasing globalisation over time: prior to 2003, the only countries publishing literature on complexity science applied to healthcare were the UK, USA, Canada and Australia, while in 2017-2018 articles came from 16 different countries. These included, for the first time, France, Pakistan, Serbia, Spain, and Switzerland.

INSERT FIGURE 2 HERE

### Stage two results: Article content

The majority of the literature (n=277, 62.8%)<sup>2</sup> applying complexity science to healthcare has been non-empirical. Of these, most (n=178) were conceptual discussions of the relevance of complexity science to aspects of healthcare. For example, Fenwick and Dahlgren [27] considered how complexity principles like emergence and self-organisation apply to simulation-based education in medicine, while Litaker, Tomolo [28] advanced the approach for understanding variation in primary care and developing flexible improvement initiatives. Other types of non-empirical articles included conceptual case-studies (n=39) where discussions of complexity science to healthcare were further concretised by real-world examples often based on the authors' prior research [e.g., 29, 30]; methodological and practical articles (n=23) focused on methods, models and frameworks to apply complexity science in healthcare [e.g., 31, 32]; shorter, more opinion-based commentaries and editorials (n=18); unstructured and narrative reviews (n=12), and protocol papers (n=7).

While there were less empirical contributions (n=149, 33.9%), their publication increased over time, especially over the last five years. These empirical articles predominantly employed

<sup>2</sup> N=13 unable to be classified because full-text was inaccessible and there was insufficient information in the abstract. Percentage calculated on the 441 articles able to be classified.



1  
2 complexity science as a conceptual framework (n=109), meaning the theory was introduced early in  
3 the article to make sense of the problem at hand. Oyeleye, Hanson [33], in this vein, situated their  
4 quantitative study of nurses' burnout and experiences of workplace incivility within a complex  
5 adaptive systems framework, noting the paradigms appreciation of individuals' interactions and  
6 interconnections, which give rise to unpredictability. In another example, Ssengooba, McPake [34]  
7 used a complexity lens in a case study examining the failure of performance-based payment in  
8 Uganda, to understand the emergence of new behaviours and adaptation of the healthcare system.  
9 To a lesser extent, empirical papers used complexity science for data collection (n=4) or analysis  
10 (n=12) where they explicitly linked their design and methods to complexity science principles. For  
11 example, Crabtree, Miller [35] made changes to their study design in order to identify attractors,  
12 based on an emerging hypothesis of primary care practices functioning like complex systems.  
13 Finally, 22 empirical studies used complexity science in a more comprehensive way in the  
14 interpretation of the findings of their research.<sup>3</sup>[e.g., 36]

15  
16  
17  
18  
19  
20  
21  
22  
23  
24  
25  
26 As well as empirical and non-empirical articles, publication of structured and systematic reviews  
27 (n=15, 3.4%) that either explicitly reviewed complexity science in healthcare [e.g., 37, 20, 19] or  
28 used these principles as a lens or framework for their review [e.g., 38, 39] also increased over the  
29 last decade. These trends are captured in Figure 3.

30  
31  
32  
33 INSERT FIGURE 3 HERE

34  
35  
36  
37 Delving deeper into the content of these articles, we coded the main focus(es) of each of the articles  
38 included in the review, then developed broader categories representing common topic themes for  
39 complexity science applied to healthcare. Multiple topic themes were often evident in a single  
40 article, so themes are not mutually exclusive. These topic themes are displayed in Table 3. The most  
41 common topic themes involved a focus on *healthcare settings* (especially *primary care* and  
42 *hospitals*), followed by *health systems and organisations generally*, *healthcare professionals*  
43 (particularly *nursing* and *medicine*), and *education*. Furthermore, while *healthcare professionals*,  
44 and *education* were early topics for complexity science in healthcare, it was not until 2006 that  
45 these principles were taken up in articles focused on *change, improvement and implementation*,  
46 *research* and *policy* (see Figure 4).

47  
48  
49  
50  
51  
52  
53  
54 **Table 3. Topic themes for articles on complexity science applied to healthcare.**

| 55<br>56 Topic themes              | 57<br>58 Number of articles <sup>1</sup> | 59<br>60 Citations per year |
|------------------------------------|------------------------------------------|-----------------------------|
| 61<br>62 Management and leadership | 63<br>64 49                              | 65<br>66 4.0                |

67  
68  
69  
70  
<sup>3</sup> Full-text unavailable for two empirical articles. There was not enough detail in the title and abstract to determine the use of complexity science.

|                                               |     |     |
|-----------------------------------------------|-----|-----|
| Education                                     | 59  | 5.9 |
| Teamwork, collaboration and care coordination | 31  | 4.8 |
| Health systems and organisations generally    | 76  | 6.0 |
| Public health and health promotion            | 31  | 4.4 |
| Safety, quality and performance               | 22  | 2.4 |
| Change, improvement and implementation        | 39  | 5.1 |
| Research                                      | 14  | 4.7 |
| Healthcare policy                             | 10  | 2.3 |
| Health settings                               | 146 | 3.4 |
| - <i>aged and nursing care</i>                | 21  | 5.7 |
| - <i>ambulatory care</i>                      | 2   | 0.8 |
| - <i>chronic care</i>                         | 9   | 4.3 |
| - <i>hospital</i>                             | 53  | 2.7 |
| - <i>mental health</i>                        | 6   | 1.9 |
| - <i>paediatrics</i>                          | 3   | 3.9 |
| - <i>palliative care</i>                      | 4   | 1.3 |
| - <i>primary care</i>                         | 48  | 6.4 |
| Healthcare professionals                      | 71  | 3.6 |
| - <i>allied health</i>                        | 2   | 0.3 |
| - <i>medicine</i>                             | 19  | 7.3 |
| - <i>nursing and midwifery</i>                | 44  | 2.7 |
| - <i>general</i>                              | 6   | 4.0 |
| Other                                         | 33  | 3.5 |

<sup>1</sup> Topic themes are not mutually exclusive, except within subthemes of health settings and healthcare professionals.

INSERT FIGURE 4 HERE

## Stage three results: Examination of influence

### Citation analysis

Influence was calculated using the number of citations each article received averaged by the number of years elapsed since publication. For the field, this amounted to an overall average of 4.9 citations a year per article, although there was high degree of skewedness (Mdn= 2.5, Min=0, Max=110.1).<sup>4</sup> At article-level, influence was considered separately for empirical and non-empirical contributions, which included structured reviews. As can be seen in Table 4, generally, non-empirical articles

<sup>4</sup> Articles published in 2018 not included in calculation.

1  
2 were more influential than empirical ones. The most influential article by a substantial margin was  
3 the conceptual discussion by Plsek and Greenhalgh,[5] published in 2001 in the BMJ, to introduce a  
4 series of papers on complexity in healthcare; numerous other papers in this series also featured in  
5 the top 10. A brief description of the main focus of each paper, which was used as the basis for  
6 developing topic themes, is present in Table 4. For non-empirical articles, the focus tended to be  
7 broader and there were a number of common themes, including application of complexity science to  
8 healthcare generally,[5] clinical practice,[40, 9] and education.[41] The empirical articles were  
9 however more varied and specific in focus, though nursing homes and primary care were common  
10 areas of interest. Influence was also examined according to the topic themes identified in stage two;  
11 based on this analysis, we found that articles focusing on complexity science specifically in relation  
12 to medical professionals were most influential, followed by articles in the primary care setting and  
13 considering health systems and organisations generally (Table 3).  
14  
15  
16  
17  
18  
19  
20  
21  
22  
23  
24

### 25 Network analysis of index references

26 The influence of included articles and other research outputs on complexity science applied to  
27 healthcare was further investigated in the network analysis of index references, depicted in the  
28 sociogram in Figure 5. The network consisted of 514 nodes (i.e., academic outputs) and 657  
29 directional ties (which output cited another output as an index reference). Of these nodes, 276  
30 (53.7%) were used as an index reference by at least one other research output in this network  
31 (indegree >0). The nodes with the highest in-degree are listed in Table 5. The most influential node  
32 in the network was the article by Plsek and Greenhalgh,[5] which was cited as an index reference  
33 for complexity science in healthcare by 71 other articles in the review. Visualisation revealed an  
34 absence of clustering by topic theme; that is, rather than seeing index referencing only between  
35 research outputs that explore similar ideas (e.g. management only uses other management outputs  
36 as index references), there were connections among the different topic themes. Finally, there were  
37 183 outputs (35.6%) used as index references that had not been included in our review.  
38  
39  
40  
41  
42  
43  
44  
45  
46  
47  
48  
49  
50  
51  
52  
53  
54  
55  
56  
57  
58  
59  
60

**Table 4. Most influential empirical and non-empirical articles on complexity science applied to healthcare.**

| <b>Empirical article</b>   | <b>Citations per year</b> | <b>Main focus description</b>                | <b>Non-empirical and review articles</b> | <b>Citations per year</b> | <b>Main focus description</b>      |
|----------------------------|---------------------------|----------------------------------------------|------------------------------------------|---------------------------|------------------------------------|
| Anderson, Issel [42]       | 29.4                      | nursing home                                 | Plsek and Greenhalgh [5]                 | 110.1                     | healthcare - general               |
| O'Sullivan, Kuziemyky [43] | 22.6                      | public health - health promotion in disaster | Fraser and Greenhalgh [10]               | 50.6                      | education                          |
| Hanseth, Jacucci [44]      | 21.8                      | hospital – EHR/IT                            | Plsek and Wilson [12]                    | 41.4                      | leadership                         |
| Monrouxe, Rees [45]        | 18.4                      | education - medicine                         | Best, Greenhalgh [38]                    | 40.7                      | healthcare system - transformation |
| Oyeleye, Hanson [46]       | 16.8                      | nursing - workplace bullying                 | Goldberger [47]                          | 39.6                      | clinical practice                  |
| Anderson, Corazzini [48]   | 15.9                      | nursing homes - job satisfaction             | Braa, Hanseth [49]                       | 35.6                      | EHR/IT - developing countries      |
| Ssengooba, McPake [34]     | 15.5                      | performance targets - health systems         | Wilson, Holt [9]                         | 28.1                      | clinical - general                 |
| Miller, McDaniel [50]      | 14.8                      | primary care                                 | Frye and Hemmer [51]                     | 28.0                      | education                          |
| Boustani, Sachs [52]       | 14.5                      | primary care - dementia care                 | Bleakley [53]                            | 25.7                      | education                          |
| Provost, Lanham [13]       | 14.0                      | collaboration and teamwork - safety          | Anderson, Crabtree [31]                  | 25.1                      | healthcare organisations           |

1  
2  
3  
4  
5  
6  
7  
8  
9  
10  
11  
12  
13  
14  
15  
16  
17  
18  
19  
20  
21  
22  
23  
24  
25  
26  
27  
28  
29  
30  
31  
32  
33  
34  
35  
36  
37  
38  
39  
40  
41  
42  
43  
44  
45  
46  
47  
48  
49  
50  
51  
52  
53  
54  
55  
56  
57  
58  
59  
60

INSERT FIGURE 5 HERE

**Table 5. In-Degree**

|    | <b>Most popular index references in network</b> | <b>In-degree</b> | <b>Topic theme of complexity</b> |
|----|-------------------------------------------------|------------------|----------------------------------|
| 1  | Plsek, P. E. and T. Greenhalgh [5]              | 71               | Health systems and organisations |
| 2  | IOM and P. E. Plsek [54]                        | 25               | Not in review                    |
| 2* | Plsek, P. E. and T. Wilson [12]                 | 25               | Management/leadership            |
| 3  | Wilson, T., T. Holt and T. Greenhalgh [9]       | 19               | Healthcare setting               |
| 3* | Zimmerman, B., C. Lindberg, and P. Plsek [55]   | 19               | Not in review                    |
| 4  | Fraser, S. W. and T. Greenhalgh [10]            | 18               | Education                        |

\* indicates equal levels of in-degree.

## DISCUSSION

Complexity science has brought a radical shift in how we think about many of the dynamic relationships and systems present in our world, with healthcare being no exception. This bibliometric review of complexity science in healthcare has identified a number of trends in the types of articles published over time, and the influence of this body of work. It has documented increasing use of a complex systems lens to describe, understand and study aspects of healthcare over the past two and a half decades, with literature emanating from numerous countries and being published in many journals. There has been considerable concentration, with only a few countries (the USA, UK, Canada and Australia) and journals responsible for a disproportionately high number of contributions; indeed, the way articles are spread across countries shows a feature of complexity in that it approximates a power law distribution.[56] At the same time, there is evidence of increasing globalisation of complexity science in healthcare literature over the years.

Our findings indicate increases in empirical research and reviews, relative to non-empirical contributions, suggesting a move from the conceptual to the concrete with regard to understanding complexity in healthcare. A recent review by Thompson, Fazio [19] though, indicates that empirical work in health services research is often inconsistent and lacks sophistication in the use of complexity science methods; similarly, Brainard and Hunter [20] reviewed complexity-informed interventions and noted that there is often a poor operationalisation of complexity science principles. In this regard, our own analysis of non-empirical research has identified a preponderance of broad conceptual discussions, rather than practical or methods articles of *how* to apply complexity science in healthcare. Likewise, empirical contributions largely used complexity science

1  
2 to situate their research problem but were less inclined to draw on its tenets in their study design  
3 and method.  
4  
5

6  
7 This bibliometric review further demonstrated that complexity science has permeated diverse  
8 contexts and topic areas within healthcare, being particularly prominent in articles on management,  
9 education, primary care and hospitals. Interest in research as well as change, improvement and  
10 implementation have emerged more recently. In regards to the former, the evolving trend for  
11 publishing articles about researching complexity in healthcare suggests increasing awareness of the  
12 need to operationalise complexity concepts. Meanwhile, for the latter, a nascent focus on change  
13 and improvement mirrors the formalisation of implementation science as a field.[e.g., 57] It is  
14 plausible that these will become more prominent target areas in the future for attention by  
15 complexity scientists.  
16  
17  
18  
19  
20  
21  
22

23  
24 Although there was variation in the degree of influence these topics had, based on average citations,  
25 our network analysis demonstrated limited clustering according to theme, which suggests cross-  
26 fertilisation of ideas across the broader body of work on complexity science in healthcare. At the  
27 same time, a number of early contributions on complexity science in healthcare have become  
28 widely-recognised in the field as the most influential both in terms of their total citations and their  
29 consistent status as index references for other articles.[e.g., 5, 10, 12, 9]  
30  
31  
32  
33  
34  
35

36  
37 Underscoring the issues this review has identified, in their recent introduction to a series on  
38 complexity in medicine and healthcare, Greenhalgh and Papoutsi [58] argued that despite the  
39 proliferation of complexity-informed research, this work has been largely superficial. The radical  
40 departure the complexity paradigm was thought to represent in the early 2000s, when the evidently  
41 seminal BMJ series was published, has not been carried through in research. The approaches of  
42 conventional science—prediction and controlled experiments—are not appropriate for studying  
43 complexity but are still often used. Going forward, in-depth, mixed-method case studies and  
44 ethnography, which can understand context and the interconnectedness of system components, are  
45 required, as are new criteria for assessing the quality of complexity-focused research.[58]  
46  
47  
48  
49  
50  
51  
52

### 53 **Strengths and limitations**

54  
55 The search strategy for this bibliometric analysis was based on that of a published review.[19]  
56 However, there might be other terms used to denote a complexity-focused articles other than those  
57 utilised here; for example, our search did not capture a study of complexity in patient-doctor  
58 interactions by Katerndahl and Parchman [59], likely because of their preference for the term  
59  
60

1  
2 “dynamic” and mention of a specific complexity analysis method (orbital dynamics). Therefore,  
3 future reviews of complexity should consider this issue in deriving search terms. Our inclusion  
4 criteria were designed to be as inclusive as possible, such as in recognising non-English language  
5 publications. Peer-reviewed journal articles are best suited to bibliometric and particularly citation  
6 analyses, rather than other academic outputs such as books, book chapters and reports, hence this  
7 being a requirement for inclusion in our review.[60, 61] While well-justified, our network analysis  
8 demonstrates the limits of this approach in that a substantial portion of index references identified  
9 were not included in our review, particularly a prominent book by Zimmerman, Lindberg [55] and  
10 Plsek’s appendix to an Institute of Medicine Report.[54] Despite this limitation, these contributions  
11 were included to some extent through our identification of index references.  
12  
13

14  
15  
16 Furthermore, the citation analysis, as well as our focus on index references, has arguably better  
17 illustrated long-term impact than the emerging influence of new and up-and-coming work on  
18 complexity science in healthcare, because the publication process can be lengthy, creating delays in  
19 the accumulation of citations.[62] Hence, more recent articles, which we have found influential in  
20 guiding our own research, such as those by Leykum, Lanham and their colleagues [e.g., 30, 63] may  
21 be revealed as more influential in the coming years. The use of “altmetrics” (e.g., social media  
22 mentions) in future bibliometric reviews could facilitate assessment of more immediate impact.[64]  
23  
24 Lastly, some contributions influential in the field have straddled public health and social care, such  
25 as the work of Hawe [65] and Sterman,[66] and so were not included based on our search strategy  
26 and inclusion criteria.  
27  
28  
29  
30  
31  
32  
33  
34  
35  
36  
37  
38  
39

## 40 CONCLUSION

41  
42 This study conducted a bibliometric analysis of the peer-reviewed literature in the evolving  
43 academic field of complexity science applied to healthcare. We identified a number of trends in  
44 where this work has been conducted and published, including that there is sustained and increasing  
45 interest in complexity science, with evident spread of ideas globally and into specific topic areas.  
46  
47 There were also clear shifts in the types of articles published over time, and their content. As a field,  
48 the application of complexity science to healthcare appears to be increasingly focused on *doing*  
49 complexity-informed research, rather than discussions of its conceptual and theoretical contours.  
50  
51 Finally, we found substantial variation in the influence of this literature at article-level, and to a  
52 lesser extent by topic of focus.  
53  
54  
55  
56  
57  
58  
59  
60



## Acknowledgements

The authors would like to thank Ms Prakriti Kunwar for her assistance in conducting the search, and title/abstract review.

## Author Contributions

KC had the original idea for the article and devised the search strategy with support from LAE, JCL and JB. KC oversaw the search, and conducted the title/abstract review and analysis with assistance from CP and LAE. CP performed the network analysis of influence. KC drafted the manuscript. CP, LAE, JCL and JB critically revised the manuscript. All authors agreed upon the final version of the manuscript.

## Data Availability Statement

The full data extraction spreadsheet may be made available upon request to the corresponding author.

## Funding

JB is supported by multiple grants, including the National Health and Medical Research Council (NHMRC) Partnership Grant for Health Systems Sustainability (ID: 9100002).

## Competing Interests

None declared.

## Abbreviations

CASs Complex Adaptive Systems

## References

1. Byrne, D, *Complexity theory and the social sciences: An introduction*. 2002, London: Routledge.
2. Chu, D, Strand, R, and Fjelland, R, *Theories of complexity*. *Complexity*, 2003. **8**(3): p. 19-30.
3. Waldrop, MM, *Complexity: The emerging science at the edge of order and chaos*. 1993: Simon and Schuster.
4. Dent, EB, *Complexity science: A worldview shift*. *Emergence*, 1999. **1**(4): p. 5-19.
5. Plsek, P and Greenhalgh, T *Complexity science: The challenge of complexity in health care*. *BMJ*, 2001. **323**, 625-8.
6. Stacey, RD, *The science of complexity: An alternative perspective for strategic change processes*. *Strategic Management Journal*, 1995. **16**(6): p. 477-495.
7. Braithwaite, J, Churruca, K, and Ellis, LA, *Can we fix the uber-complexities of healthcare?* *Journal of the Royal Society of Medicine*, 2017: p. 0141076817728419 DOI: 10.1177/0141076817728419.
8. Braithwaite, J, Churruca, K, Ellis, LA, Long, J, Clay-Williams, R, Damen, N, et al., *Complexity Science in Healthcare – Aspirations, Approaches, Applications and Accomplishments: A White Paper*. 2017, Australian Institute of Health Innovation, Macquarie University: Macquarie University, Sydney, Australia.
9. Wilson, T, Holt, T, and Greenhalgh, T, *Complexity science: Complexity and clinical care*. *BMJ*, 2001. **323**(7314): p. 685-8.
10. Fraser, SW and Greenhalgh, T, *Complexity science - Coping with complexity: educating for capability*. *BMJ*, 2001. **323**(7316): p. 799-803 DOI: 10.1136/bmj.323.7316.799.
11. McDaniel, RR and Driebe, DJ, *Complexity science and health care management*, in *Advances in Health Care Management*, L.H. Friedman, J. Goes, and G.T. Savage, Editors. 2001, Emerald Group Publishing Limited: Bingley, UK. p. 11-36.
12. Plsek, PE and Wilson, T, *Complexity science - Complexity, leadership, and management in healthcare organisations*. *BMJ*, 2001. **323**(7315): p. 746-749 DOI: 10.1136/bmj.323.7315.746.
13. Provost, SM, Lanham, HJ, Leykum, LK, McDaniel, RR, Jr., and Pugh, J, *Health care huddles: Managing complexity to achieve high reliability*. *Health Care Management Review*, 2015. **40**(1): p. 2-12 DOI: 10.1097/hmr.0000000000000009.
14. Cooper, HC and Geyer, R, *What can complexity do for diabetes management? Linking theory to practice*. *Journal of Evaluation in Clinical Practice*, 2009. **15**(4): p. 761-5 DOI: 10.1111/j.1365-2753.2009.01229.x.

- 1  
2 15. Braithwaite, J, Churrua, K, Long, JC, Ellis, LA, and Herkes, J, *When complexity science*  
3 *meets implementation science: a theoretical and empirical analysis of systems change.*  
4 BMC Medicine, 2018. **16**(1): p. 63 DOI: 10.1186/s12916-018-1057-z.  
5
- 6  
7 16. Zimmerman, B, *Complexity science: a route through hard times and uncertainty.* Health  
8 Forum journal, 1999. **42**(2): p. 42-69.  
9
- 10  
11 17. Anderson, RA and McDaniel, RR, *RN participation in organizational decision making and*  
12 *improvements in resident outcomes.* Health Care Management Review, 1999. **24**(1): p. 7-16  
13 DOI: 10.1097/00004010-199901000-00002.  
14
- 15  
16 18. Barasa, EW, Molyneux, S, English, M, and Cleary, S, *Hospitals as complex adaptive*  
17 *systems: A case study of factors influencing priority setting practices at the hospital level in*  
18 *Kenya.* Social science & medicine (1982), 2017. **174**: p. 104-112 DOI:  
19 10.1016/j.socscimed.2016.12.026.  
20
- 21  
22 19. Thompson, DS, Fazio, X, Kustra, E, Patrick, L, and Stanley, D, *Scoping review of*  
23 *complexity theory in health services research.* BMC Health Services Research, 2016. **16**(1):  
24 p. 1-16 DOI: 10.1186/s12913-016-1343-4.  
25
- 26  
27 20. Brainard, J and Hunter, PR, *Do complexity-informed health interventions work? A scoping*  
28 *review.* Implementation Science, 2016. **11**(1): p. 127 DOI: 10.1186/s13012-016-0492-5.  
29
- 30  
31 21. Rusoja, E, Haynie, D, Sievers, J, Mustafee, N, Nelson, F, Reynolds, M, et al., *Thinking*  
32 *about complexity in health: A systematic review of the key systems thinking and complexity*  
33 *ideas in health.* Journal of Evaluation in Clinical Practice, 2018 DOI: 10.1111/jep.12856.  
34
- 35  
36 22. Cook, RI and Ekstedt, M, *Reflections on resilience: Repertoires and system features,* in  
37 *Resilient Health Care: Reconciling Work-as-Imagined and Work-as-Done,* J. Braithwaite,  
38 R.L. Wears, and E. Hollnagel, Editors. 2017, CRC Press, Taylor & Francis Group: Boca  
39 Raton, FL, USA. p. 111-118.  
40
- 41  
42 23. Braithwaite, J, Herkes, J, Ludlow, K, Testa, L, and Lamprell, G, *Association between*  
43 *organisational and workplace cultures, and patient outcomes: systematic review.* BMJ  
44 Open, 2017. **7**(11): p. e017708 DOI: 10.1136/bmjopen-2017-017708.  
45
- 46  
47 24. Kottke, TE, Huebsch, JA, McGinnis, P, Nichols, JM, Parker, ED, Tillema, JO, et al., *Using*  
48 *Principles of Complex Adaptive Systems to Implement Secondary Prevention of Coronary*  
49 *Heart Disease in Primary Care.* The Permanente Journal, 2016. **20**(2): p. 17-24 DOI:  
50 10.7812/TPP/15-100.  
51
- 52  
53 25. Wasserman, S and Faust, K, *Social network analysis: Methods and applications.* Vol. 8.  
54 1994: Cambridge university press.  
55
- 56  
57 26. McHugh, ML, *Interrater reliability: the kappa statistic.* Biochemia medica, 2012. **22**(3): p.  
58 276-282.  
59  
60

- 1  
2 27. Fenwick, T and Dahlgren, MA, *Towards socio-material approaches in simulation-based*  
3 *education: lessons from complexity theory*. Medical Education, 2015. **49**(4): p. 359-367  
4 DOI: 10.1111/medu.12638.  
5  
6  
7 28. Litaker, D, Tomolo, A, Liberatore, V, Stange, KC, and Aron, D, *Using complexity theory to*  
8 *build interventions that improve health care delivery in primary care*. Journal of General  
9 Internal Medicine, 2006. **21**(2): p. S30 DOI: 10.1007/s11606-006-0272-z.  
10  
11  
12 29. Crabtree, BF, Nutting, PA, Miller, WL, McDaniel, RR, Stange, KC, Jaen, CR, et al.,  
13 *Primary care practice transformation is hard work: insights from a 15-year developmental*  
14 *program of research*. Medical care, 2011. **49 Suppl**(Suppl): p. S28-S35 DOI:  
15 10.1097/MLR.0b013e3181cad65c.  
16  
17  
18  
19 30. Lanham, HJ, Leykum, LK, Taylor, BS, McCannon, CJ, Lindberg, C, and Lester, RT, *How*  
20 *complexity science can inform scale-up and spread in health care: Understanding the role*  
21 *of self-organization in variation across local contexts*. Social Science & Medicine, 2013. **93**:  
22 p. 194-202 DOI: 10.1016/j.socscimed.2012.05.040.  
23  
24  
25  
26 31. Anderson, RA, Crabtree, BF, Steele, DJ, and McDaniel, RR, *Case Study Research: The*  
27 *View From Complexity Science*. Qualitative Health Research, 2005. **15**(5): p. 669-685 DOI:  
28 10.1177/1049732305275208.  
29  
30  
31 32. Norman, CD, Charnaw-Burger, J, Yip, AL, Saad, S, and Lombardo, C, *Designing health*  
32 *innovation networks using complexity science and systems thinking: the CoNEKTR model*.  
33 Journal of Evaluation in Clinical Practice, 2010. **16**(5): p. 1016-1023 DOI: 10.1111/j.1365-  
34 2753.2010.01534.x.  
35  
36  
37  
38 33. Oyeleye, O, Hanson, P, O'Connor, N, and Dunn, D, *Relationship of Workplace Incivility,*  
39 *Stress, and Burnout on Nurses' Turnover Intentions and Psychological Empowerment*.  
40 JONA: The Journal of Nursing Administration, 2013. **43**(10): p. 536-542 DOI:  
41 10.1097/NNA.0b013e3182a3e8c9.  
42  
43  
44  
45 34. Ssengooba, F, McPake, B, and Palmer, N, *Why performance-based contracting failed in*  
46 *Uganda – An “open-box” evaluation of a complex health system intervention*. Social  
47 Science & Medicine, 2012. **75**(2): p. 377-383 DOI:  
48 <https://doi.org/10.1016/j.socscimed.2012.02.050>.  
49  
50  
51  
52 35. Crabtree, BF, Miller, WL, and Stange, KC, *Understanding Practice from the Ground Up*, in  
53 *Journal of Family Practice*. 2001. p. 881.  
54  
55  
56 36. Durie, R and Wyatt, K, *New communities, new relations: The impact of community*  
57 *organization on health outcomes*. Social Science & Medicine, 2007. **65**(9): p. 1928-1941  
58 DOI: <https://doi.org/10.1016/j.socscimed.2007.05.039>.  
59  
60

- 1  
2  
3  
4  
5  
6  
7  
8  
9  
10  
11  
12  
13  
14  
15  
16  
17  
18  
19  
20  
21  
22  
23  
24  
25  
26  
27  
28  
29  
30  
31  
32  
33  
34  
35  
36  
37  
38  
39  
40  
41  
42  
43  
44  
45  
46  
47  
48  
49  
50  
51  
52  
53  
54  
55  
56  
57  
58  
59  
60
37. Sturmberg, JP, Martin, CM, and Katerndahl, DA, *Systems and Complexity Thinking in the General Practice Literature: An Integrative, Historical Narrative Review*. *The Annals of Family Medicine*, 2014. **12**(1): p. 66-74 DOI: 10.1370/afm.1593.
38. Best, A, Greenhalgh, T, Lewis, S, Saul, JE, Carroll, S, and Bitz, J, *Large-system transformation in health care: A realist review*. *Milbank Quarterly*, 2012. **90**: p. 421–456 DOI: 10.1111/j.1468-0009.2012.00670.x.
39. Lorthios-Guillement, A, Richard, L, and Filiatrault, J, *Factors associated with the implementation of community-based peer-led health promotion programs: A scoping review*. *Evaluation and Program Planning*, 2018. **68**: p. 19-33 DOI: <https://doi.org/10.1016/j.evalprogplan.2018.01.008>.
40. Goldberger, AL, *Non-linear dynamics for clinicians: Chaos theory, fractals, and complexity at the bedside*. *Lancet*, 1996. **347**(9011): p. 1312-1314 DOI: 10.1016/s0140-6736(96)90948-4.
41. Sargeant, J, *Theories to aid understanding and implementation of interprofessional education*. *Journal of Continuing Education in the Health Professions*, 2009. **29**(3): p. 178-184 DOI: 10.1002/chp.20033.
42. Anderson, RA, Issel, LM, and McDaniel, RR, *Nursing Homes as Complex Adaptive Systems: Relationship between Management Practice and Resident Outcomes*. *Nursing Research*, 2003. **52**(1): p. 12-21.
43. O'Sullivan, TL, Kuziemsky, CE, Toal-Sullivan, D, and Corneil, W, *Unraveling the complexities of disaster management: A framework for critical social infrastructure to promote population health and resilience*. *Social Science & Medicine*, 2013. **93**: p. 238-246 DOI: <https://doi.org/10.1016/j.socscimed.2012.07.040>.
44. Hanseth, O, Jacucci, E, Grisot, M, and Aanestad, M, *Reflexive Standardization: Side Effects and Complexity in Standard Making*. *MIS Quarterly*, 2006. **30**: p. 563-581 DOI: 10.2307/25148773.
45. Monrouxe, LV, Rees, CE, and Hu, W, *Differences in medical students' explicit discourses of professionalism: acting, representing, becoming*. *Medical Education*, 2011. **45**(6): p. 585-602 DOI: 10.1111/j.1365-2923.2010.03878.x.
46. Oyeleke, O, Hanson, P, O'Connor, N, and Dunn, D, *Relationship of Workplace Incivility, Stress, and Burnout on Nurses' Turnover Intentions and Psychological Empowerment*. *Journal of Nursing Administration*, 2013. **43**(10): p. 536-542 DOI: 10.1097/NNA.0b013e3182a3e8c9.

- 1  
2 47. Goldberger, AL, *Non-linear dynamics for clinicians: chaos theory, fractals, and complexity*  
3 *at the bedside*. The Lancet, 1996. **347**(9011): p. 1312-1314 DOI:  
4 [https://doi.org/10.1016/S0140-6736\(96\)90948-4](https://doi.org/10.1016/S0140-6736(96)90948-4).  
5  
6  
7 48. Anderson, RA, Corazzini, KN, and McDaniel, JRR, *Complexity Science and the Dynamics*  
8 *of Climate and Communication: Reducing Nursing Home Turnover*. The Gerontologist,  
9 2004. **44**(3): p. 378-388 DOI: 10.1093/geront/44.3.378.  
10  
11  
12 49. Braa, J, Hanseth, O, Heywood, A, Mohammed, W, and Shaw, V, *Developing Health*  
13 *Information Systems in Developing Countries: The Flexible Standards Strategy*. MIS  
14 Quarterly, 2007. **31**(2): p. 381-402 DOI: 10.2307/25148796.  
15  
16  
17 50. Miller, WL, McDaniel, RR, Crabtree, BF, and Stange, KC, *Practice jazz: understanding*  
18 *variation in family practices using complexity science*. The Journal of Family Practice,  
19 2001.  
20  
21  
22 51. Frye, AW and Hemmer, PA, *Program evaluation models and related theories: AMEE Guide*  
23 *No. 67*. Medical Teacher, 2012. **34**(5): p. e288-e299 DOI: 10.3109/0142159X.2012.668637.  
24  
25  
26 52. Boustani, MA, Sachs, GA, Alder, CA, Munger, S, Schubert, CC, Guerriero Austrom, M, et  
27 al., *Implementing innovative models of dementia care: The Healthy Aging Brain Center*.  
28 *Aging and Mental Health*, 2011. **15**(1): p. 13-22 DOI: 10.1080/13607863.2010.496445.  
29  
30  
31 53. Bleakley, A, *Broadening conceptions of learning in medical education: the message from*  
32 *teamworking*. Medical Education, 2006. **40**(2): p. 150-157 DOI: 10.1111/j.1365-  
33 2929.2005.02371.x.  
34  
35  
36 54. Plsek, P, *Appendix B: Redesigning health care with insights from the science of complex*  
37 *adaptive systems*, in *Crossing the quality chasm: A new health system for the 21st century*,  
38 Institute of Medicine, Editor. 2001. p. 309-322.  
39  
40  
41 55. Zimmerman, B, Lindberg, C, and Plsek, PE, *Edgeware: Insights from complexity science for*  
42 *health care leaders*. 1998, Irving, TX: VHA Publishing.  
43  
44  
45 56. Burton, C, Elliott, A, Cochran, A, and Love, T, *Do healthcare services behave as complex*  
46 *systems? Analysis of patterns of attendance and implications for service delivery*. BMC  
47 *Medicine*, 2018. **16**(1): p. 138 DOI: 10.1186/s12916-018-1132-5.  
48  
49  
50 57. Eccles, MP and Mittman, BS, *Welcome to Implementation Science*. Implementation Science,  
51 2006. **1**(1): p. 1 DOI: 10.1186/1748-5908-1-1.  
52  
53  
54 58. Greenhalgh, T and Papoutsi, C, *Studying complexity in health services research: desperately*  
55 *seeking an overdue paradigm shift*. BMC Medicine, 2018. **16**(1): p. 95 DOI:  
56 10.1186/s12916-018-1089-4.  
57  
58  
59  
60



- 1  
2  
3  
4  
5  
6  
7  
8  
9  
10  
11  
12  
13  
14  
15  
16  
17  
18  
19  
20  
21  
22  
23  
24  
25  
26  
27  
28  
29  
30  
31  
32  
33  
34  
35  
36  
37  
38  
39  
40  
41  
42  
43  
44  
45  
46  
47  
48  
49  
50  
51  
52  
53  
54  
55  
56  
57  
58  
59  
60
59. Katerndahl, D and Parchman, ML, *Dynamical difference in patients encounters involving uncontrolled diabetes: an orbital decomposition analysis*. Journal of Evaluation in Clinical Practice, 2010. **16**(1): p. 211-219 DOI: 10.1111/j.1365-2753.2009.01360.x.
  60. Thomson Reuters, *Whitepaper - Using Bibliometrics: A guide to evaluating research performance with citation data*. 2008.
  61. De Bellis, N, *Bibliometrics and citation analysis: from the science citation index to cybermetrics*. 2009, Lanham, MD: The Scarecrow Press.
  62. Eysenbach, G, *Can Tweets Predict Citations? Metrics of Social Impact Based on Twitter and Correlation with Traditional Metrics of Scientific Impact*. Journal of Medical Internet Research, 2011. **13**(4): p. e123 DOI: 10.2196/jmir.2012.
  63. Leykum, LK, Lanham, HJ, Pugh, JA, Parchman, M, Anderson, RA, Crabtree, BF, et al., *Manifestations and implications of uncertainty for improving healthcare systems: an analysis of observational and interventional studies grounded in complexity science*. Implementation Science, 2014. **9**: p. 165 DOI: 10.1186/s13012-014-0165-1.
  64. Barbaro, A, Gentili, D, and Rebuffi, C, *Altmetrics as new indicators of scientific impact*. Journal of the European Association for Health Information and Libraries, 2014. **10**(1): p. 3-6.
  65. Hawe, P, *Lessons from complex interventions to improve health*. Annual Review of Public Health, 2015. **36**: p. 307-323 DOI: 10.1146/annurev-publhealth-031912-114421.
  66. Stermann, JD, *Learning from evidence in a complex world*. Am J Public Health, 2006. **96**(3): p. 505-514 DOI: 10.2105/ajph.2005.066043.



1  
2  
3  
4  
5  
6  
7  
8  
9  
10  
11  
12  
13  
14  
15  
16  
17  
18  
19  
20  
21  
22  
23  
24  
25  
26  
27  
28  
29  
30  
31  
32  
33  
34  
35  
36  
37  
38  
39  
40  
41  
42  
43  
44  
45  
46  
47  
48  
49  
50  
51  
52  
53  
54  
55  
56  
57  
58  
59  
60

## FIGURE LEGENDS

**Figure 1. PRISMA flow diagram of search strategy**

**Figure 2. Global trends for publishing articles on complexity science applied to healthcare.**

**Figure 3. Trends over time in the types of articles published on complexity science applied to healthcare.** Note data collected mid-2018.

**Figure 4. Trend over time in the publications of complexity science applied to healthcare by topic theme.**

**Figure 5. Sociogram of index references for complexity science applied to healthcare.**

Each circle (node) is representative of a research output. The size of node is indicative of in-degree (larger nodes indicate a higher number of references towards the output as an index). Colour of node is indicative of the topic theme. \* indicates equal levels of in-degree for corresponding rank.

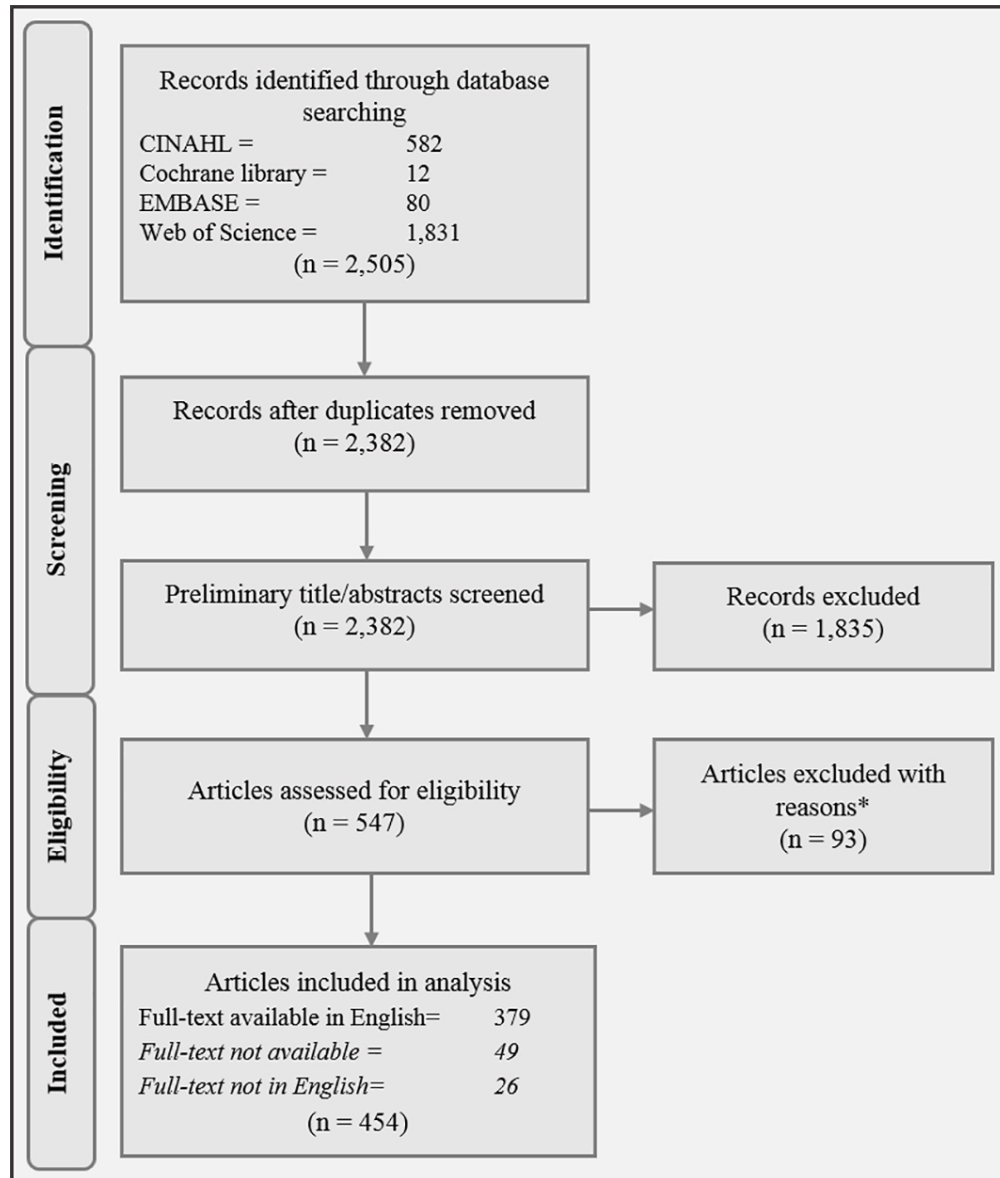

Figure 1. PRISMA flow diagram of search strategy

90x106mm (300 x 300 DPI)

1  
2  
3  
4  
5  
6  
7  
8  
9  
10  
11  
12  
13  
14  
15  
16  
17  
18  
19  
20  
21  
22  
23  
24  
25  
26  
27  
28  
29  
30  
31  
32  
33  
34  
35  
36  
37  
38  
39  
40  
41  
42  
43  
44  
45  
46  
47  
48  
49  
50  
51  
52  
53  
54  
55  
56  
57  
58  
59  
60

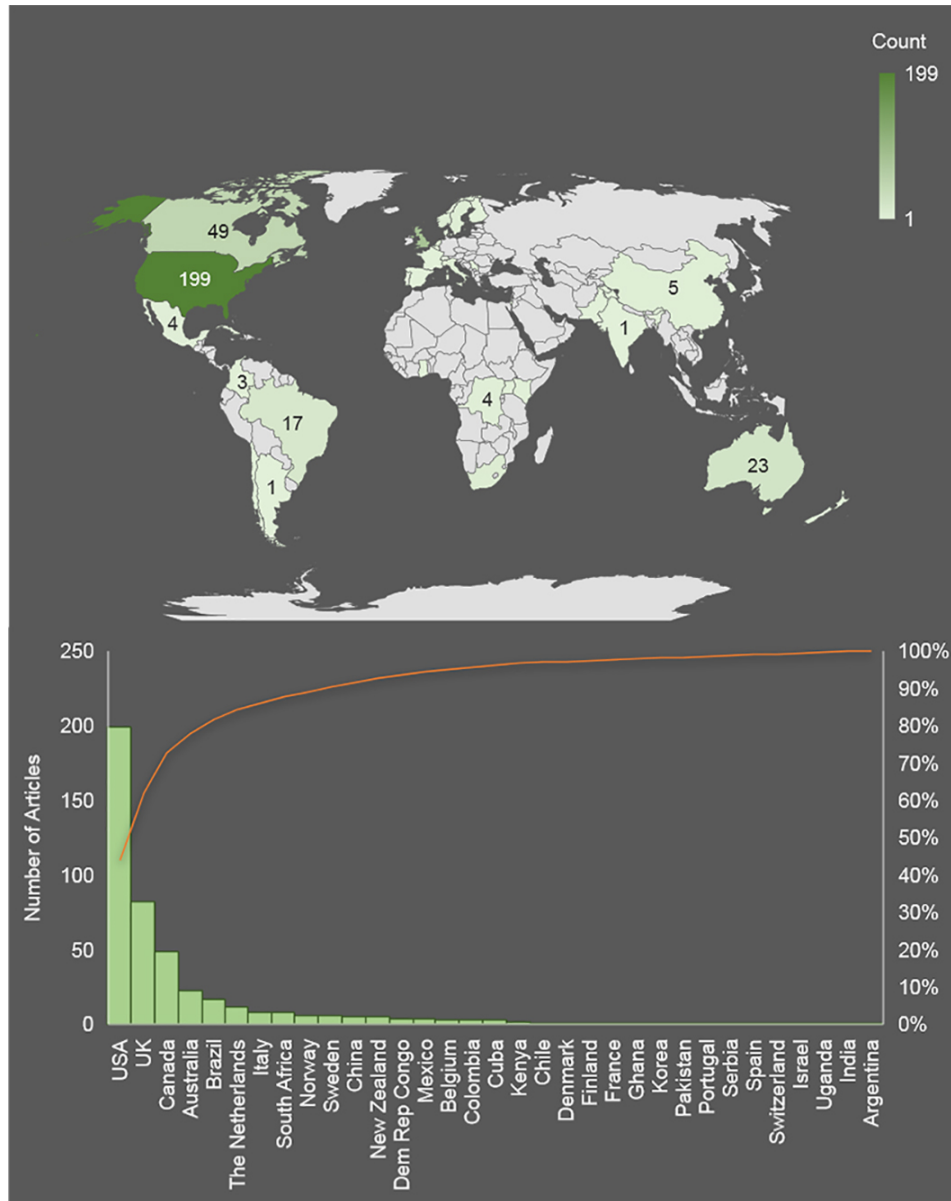

Figure 2. Global trends for publishing articles on complexity science applied to healthcare.

90x112mm (300 x 300 DPI)

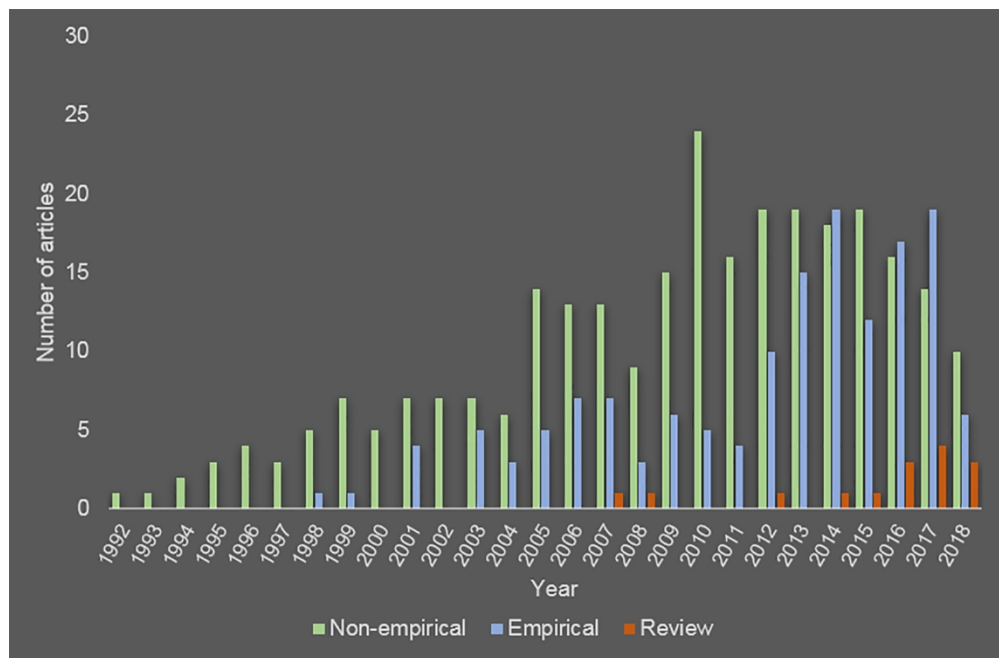

Figure 3. Trends over time in the types of articles published on complexity science applied to healthcare. Note data collected mid-2018

142x93mm (300 x 300 DPI)

1  
2  
3  
4  
5  
6  
7  
8  
9  
10  
11  
12  
13  
14  
15  
16  
17  
18  
19  
20  
21  
22  
23  
24  
25  
26  
27  
28  
29  
30  
31  
32  
33  
34  
35  
36  
37  
38  
39  
40  
41  
42  
43  
44  
45  
46  
47  
48  
49  
50  
51  
52  
53  
54  
55  
56  
57  
58  
59  
60

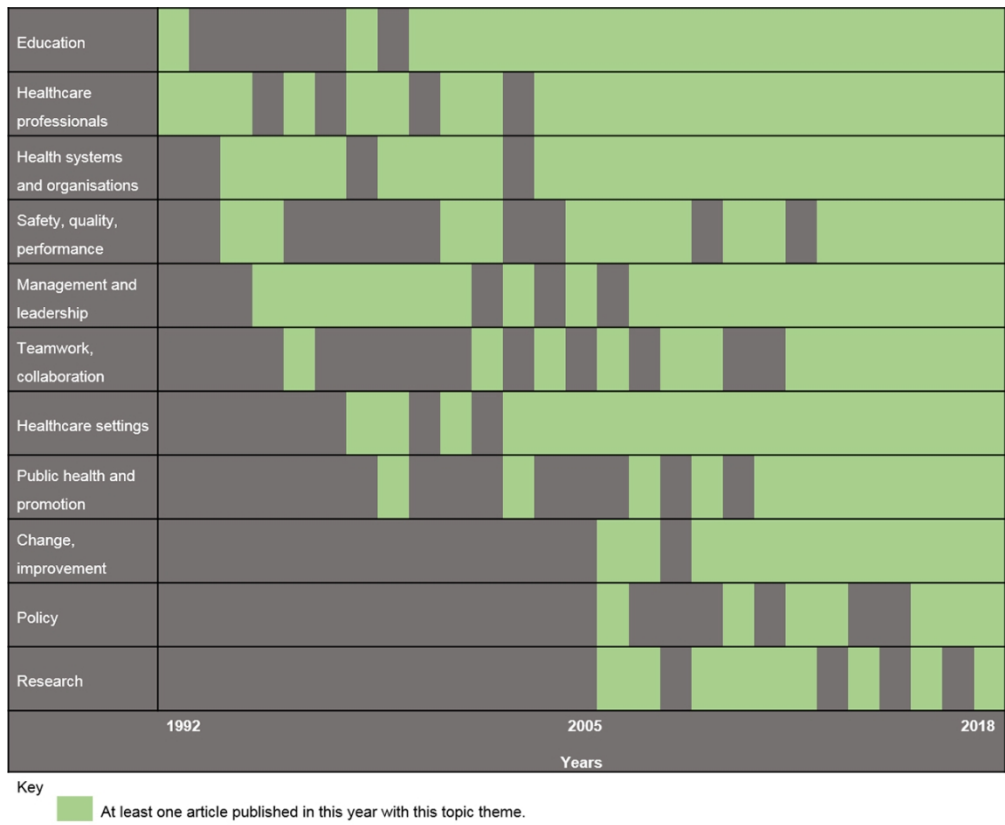

Figure 4. Trend over time in the publications of complexity science applied to healthcare by topic theme.

107x90mm (300 x 300 DPI)

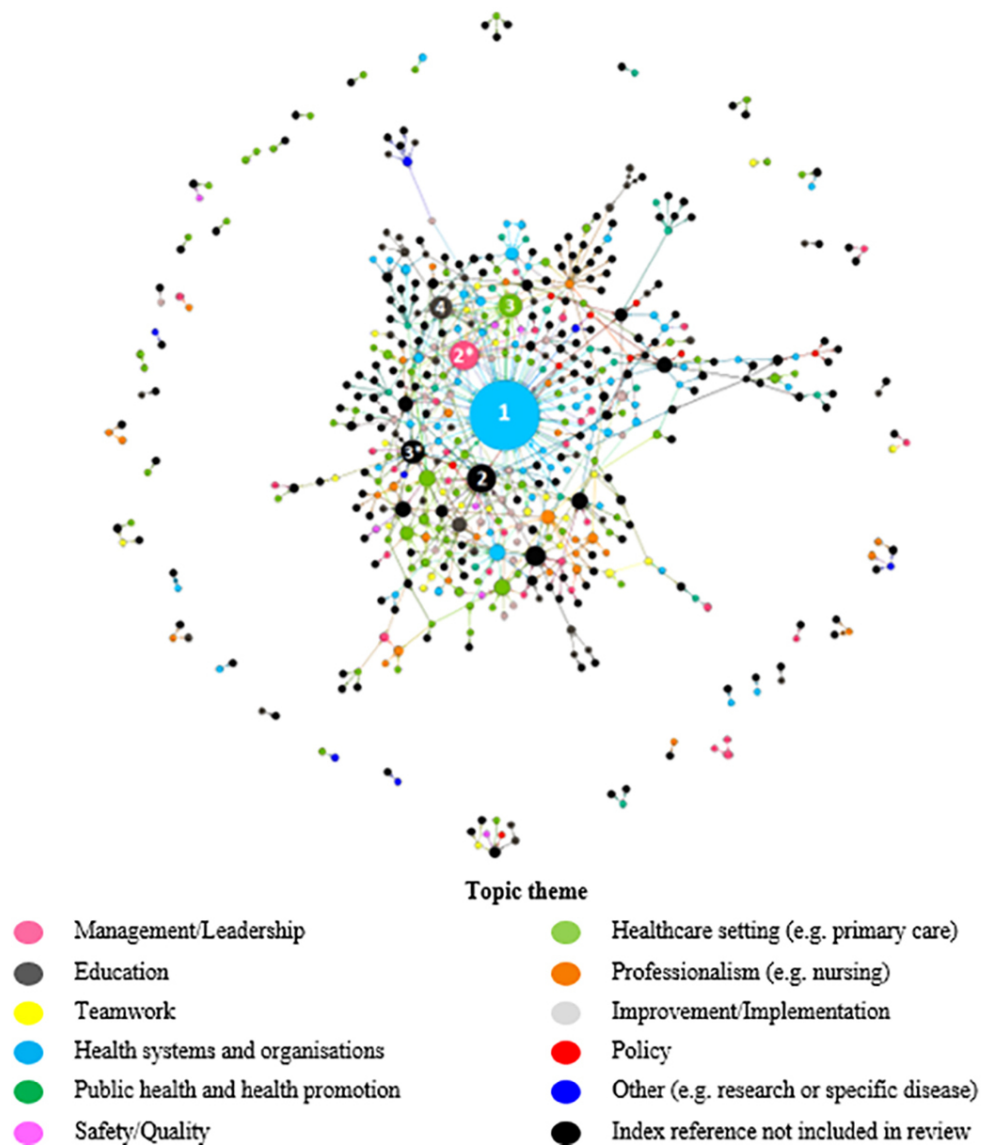

Figure 5. Sociogram of index references for complexity science applied to healthcare. Each circle (node) is representative of a research output. The size of node is indicative of in-degree (larger nodes indicate a higher number of references towards the output as an index). Colour of node is indicative of the topic theme. \* indicates equal levels of in-degree for corresponding rank.

90x103mm (300 x 300 DPI)

**Appendix 1.**

Database: Web of Science All Databases

Includes Web of Science Core Collection, BIOSIS Citation Index, Current Contents Connect, Inspec<sup>®</sup>, KCI-Korean Journal Database, MEDLINE<sup>®</sup>, Russian Science Citation Index, SciELO Citation Index, Zoological Record

1864-Present

Search using TS=topic search (Title, Abstract, Author Keywords, Keywords Plus<sup>®</sup>)

---

1. TS=(healthcare OR “health care” OR “health-care” OR hospital OR “health facilit\*” OR “acute care” OR “health organi\*” OR “health system” OR “primary care” OR “general practice” OR “aged care” OR “nurs\* home” OR medic\* OR clinic\* OR nurs\* OR health)
2. TS=(“Complexity theory” OR “complexity science” OR “complex adaptive system” OR “complexity thinking” OR “complex responsive process theory” OR “chaos theory”)
3. 1 and 2



## Appendix 2.

| Source                                                                                                        | Average citations per year | Country of corresponding author | Journal                                                                        | Empirical     | Healthcare context                                                      |
|---------------------------------------------------------------------------------------------------------------|----------------------------|---------------------------------|--------------------------------------------------------------------------------|---------------|-------------------------------------------------------------------------|
| Abbott, P. A., J. Foster, H. d. F. Marin and P. C. Dykes (2014)                                               | 10.75                      | USA                             | International journal of medical informatics                                   | Empirical     | IT implementation                                                       |
| Afek, A., A. Meilik and Z. Rotstein (2009)                                                                    | 0.22                       | Israel                          | Harefuah                                                                       | Non-empirical | Management                                                              |
| Agyepong, I. A., A. Kodua, S. Adjei and T. Adam (2012)                                                        | 8.83                       | Ghana                           | Health policy and planning                                                     | Empirical     | Health system - policy                                                  |
| Aherne, M. and J. Pereira (2005)                                                                              | 1.17                       | Canada                          | Leadership in health services                                                  | Non-empirical | Health care policy - palliative care                                    |
| Aita, V., H. McIlvain, E. Backer, K. McVea and B. Crabtree (2005)                                             | 5.92                       | USA                             | Patient education and counseling                                               | Empirical     | Primary care - patient-practitioner communication                       |
| Albanese, M., G. Mejicano, G. Xakellis and P. Kokotailo (2009)                                                | 2.11                       | USA                             | Academic medicine                                                              | Non-empirical | Health care systems                                                     |
| Allred, C. A., B. J. Burns and S. D. Phillips (2005)                                                          | 1.69                       | USA                             | Administration and policy in mental health and mental health services research | Non-empirical | Community mental health care - assertive community treatment            |
| Anderson, C. A. and A. L. Whall (2011)                                                                        | 0.71                       | USA                             | Journal of advanced nursing                                                    | Non-empirical | Nursing - research - agent based modelling                              |
| Anderson, R. A. and R. R. McDaniel (1999)                                                                     | 5.68                       | USA                             | Health care management review                                                  | Empirical     | Nursing home - nursing - decision making                                |
| Anderson, R. A. and R. R. McDaniel Jr (2000)                                                                  | 18.33                      | USA                             | Health care management review                                                  | Non-empirical | Leadership and professionalism                                          |
| Anderson, R. A., B. E. Crabtree, D. J. Steele and R. R. McDaniel (2005)                                       | 25.08                      | USA                             | Qualitative health research                                                    | Non-empirical | Health care organisations                                               |
| Anderson, R. A., C. A. Allred and F. A. Sloan (2003)                                                          | 1.47                       | USA                             | Health care management review                                                  | Empirical     | Hospital - management practice changes in light of ownership conversion |
| Anderson, R. A., D. E. Bailey, B. Wu, K. Corazzini, E. S. McConnell, N. M. Thygeson and S. L. Docherty (2015) | 5.67                       | USA                             | Advances in nursing science                                                    | Non-empirical | Leadership – chronic illness                                            |
| Anderson, R. A., K. Corazzini, K. Porter, K. Daily, R. R. McDaniel and C. Colon-Emeric (2012)                 | 7.33                       | USA                             | Implementation science                                                         | Non-empirical | Nursing homes                                                           |

|                                                                                                                                       |       |                |                                            |               |                                             |
|---------------------------------------------------------------------------------------------------------------------------------------|-------|----------------|--------------------------------------------|---------------|---------------------------------------------|
| Anderson, R. A., K. N. Corazzini and R. R. McDaniel Jr (2004)                                                                         | 15.93 | USA            | The gerontologist                          | Empirical     | Nursing homes - job satisfaction            |
| Anderson, R. A., L. M. Issel and R. R. McDaniel (2003)                                                                                | 29.40 | USA            | Nursing research                           | Empirical     | Nursing home                                |
| Anthony, M. K., J. Kloos, P. Beam and K. Vidal (2018)                                                                                 | 0     | USA            | Journal of nursing care                    | Non-empirical | Hospital - nursing hand-off                 |
| Arndt, M. and B. Bigelow (2000)                                                                                                       | 4.11  | USA            | Health care management review              | Non-empirical | Management                                  |
| Arruda, C., S. G. R. Lopes, M. H. A. d. L. Koerich, D. R. Winck, B. H. S. Meirelles and A. L. S. F. d. Mello (2015)                   | 2.00  | Brazil         | Escola anna nery                           | Non-empirical | Health care networks                        |
| Ashmos, D. P., J. W. Huonker and R. R. McDaniel (1998)                                                                                | 5.15  | USA            | Health care management review              | Empirical     | Hospital – leadership                       |
| Atun, R. A., I. Kyratsis, G. Jelic, D. Rados-Malicbegovic and I. Gurol-Urganci (2007)                                                 | 7.73  | United Kingdom | Health policy and planning                 | Empirical     | Primary care – reform                       |
| Augustinsson, S. and P. Petersson (2015)                                                                                              | 1.67  | Sweden         | Journal of research in nursing             | Empirical     | Hospital - nursing - discharge planning     |
| Baghbanian, A. and G. Torkfar (2012)                                                                                                  | 1.33  | Australia      | Australian health review                   | Non-empirical | Health system - economics and policy        |
| Bailey, D. E., S. L. Docherty, J. A. Adams, D. L. Carthron, K. Corazzini, J. R. Day, E. Neglia, M. Thygeson and R. A. Anderson (2012) | 5.00  | USA            | Journal of healthcare leadership           | Non-empirical | Leadership                                  |
| Barasa, E. W., S. Molyneux, M. English and S. Cleary (2017)                                                                           | 12.00 | Kenya          | Social science & medicine                  | Empirical     | Hospitals - priority setting                |
| Baskin, K., J. Goldstein and C. Lindberg (2000)                                                                                       | 0.89  | USA            | Physician executive                        | Non-empirical | Mergers                                     |
| Beautement, P. and C. Broenner (2012)                                                                                                 | 0.29  | United Kingdom | Journal of evaluation in clinical practice | Non-empirical | Health care practice                        |
| Bebber, R. and A. Liberman (2008)                                                                                                     | 0.20  | USA            | International journal of public policy     | Non-empirical | Hospital – bioterrorism                     |
| Bedin, D. M., H. B. Kochenberger Scarparo, H. A. Martinez and I. B. Matos (2014)                                                      | 0     | Brazil         | Saude e sociedade                          | Non-empirical | Management                                  |
| Begun, J. W. and A. A. Kaissi (2005)                                                                                                  | 3.15  | USA            | Journal of healthcare management           | Empirical     | Healthcare planning - leadership/management |

|                                                                                                                                                                                                         |       |                |                                                               |               |                                                    |
|---------------------------------------------------------------------------------------------------------------------------------------------------------------------------------------------------------|-------|----------------|---------------------------------------------------------------|---------------|----------------------------------------------------|
| Bell, I. R., M. Koithan and D. Pincus (2012)                                                                                                                                                            | 6.67  | USA            | Forschende komplementarmedizin                                | Non-empirical | Complementary medicine                             |
| Bennett, C. (2003)                                                                                                                                                                                      | 0.13  | Canada         | Healthcare papers                                             | Non-empirical | Health care system – hospital                      |
| Best, A., T. Greenhalgh, S. Lewis, J. E. Saul, S. Carroll and J. Bitz (2012)                                                                                                                            | 40.67 | Canada         | The milbank quarterly                                         | Review        | Health care system – transformation                |
| Betancourt Betancourt, J. A. and R. M. Ramis Andalia (2010)                                                                                                                                             | 1.50  | Cuba           | Revista cubana de salud pública                               | Non-empirical | Health and healthcare generally                    |
| Betancourt Bethencourt, J. A., F. Martínez Álvarez, M. Álvarez Escoda and E. Nicolau Pestano (2016)                                                                                                     | 0     | Cuba           | Humanidades médicas                                           | Non-empirical | Education                                          |
| Betancourt Bethencourt, J. A., R. M. Ramis Andalia and M. Mirabal Nápoles (2014)                                                                                                                        | 2.25  | Cuba           | Revista cubana de salud pública                               | Non-empirical | Primary care – translation                         |
| Bircher, J. and E. G. Hahn (2017)                                                                                                                                                                       | 3.00  | Switzerland    | Cureus                                                        | Non-empirical | Health and healthcare generally                    |
| Bleakley, A. (2006)                                                                                                                                                                                     | 25.60 | United Kingdom | Medical education                                             | Non-empirical | Education                                          |
| Bleakley, A. (2006)a                                                                                                                                                                                    | 4.33  | United Kingdom | Journal of medicine and philosophy                            | Non-empirical | Hospital - operating theatre, teamwork             |
| Bleakley, A. (2010)                                                                                                                                                                                     | 9.38  | United Kingdom | Journal of evaluation in clinical practice                    | Non-empirical | Education                                          |
| Bloom, L. A. and B. S. Bloom (1999)                                                                                                                                                                     | 0.316 | USA            | International journal of technology assessment in health care | Non-empirical | Decision making                                    |
| Bogren, M. U., M. Berg, L. Edgren, E. van Teijlingen and H. Wigert (2016)                                                                                                                               | 1.50  | Sweden         | Sexual and reproductive healthcare                            | Empirical     | Professionalism – midwifery                        |
| Boustani, M. A., A. Frame, S. Munger, P. Healey, J. Westlund, M. Farlow, A. Hake, M. G. Austrom, P. Shepard, C. Bubp, J. Azar, A. Nazir, N. Adams, N. L. Campbell, A. Chehresa and P. Dexter (2012)     | 1.33  | USA            | Clinical interventions in aging                               | Empirical     | Professional network - dementia care – improvement |
| Boustani, M. A., G. A. Sachs, C. A. Alder, S. Munger, C. C. Schubert, M. Guerriero Austrom, A. M. Hake, F. W. Unverzagt, M. Farlow, B. R. Matthews, A. J. Perkins, R. A. Beck and C. M. Callahan (2011) | 14.50 | USA            | Aging & mental health                                         | Empirical     | Primary care - dementia care                       |

|                                                                                                                                                              |       |                |                                             |               |                                                            |
|--------------------------------------------------------------------------------------------------------------------------------------------------------------|-------|----------------|---------------------------------------------|---------------|------------------------------------------------------------|
| Boustani, M. A., S. Munger, R. Gulati, M. Vogel, R. A. Beck and C. M. Callahan (2010)                                                                        | 5.63  | USA            | Clinical interventions in aging             | Non-empirical | Implementation and system change                           |
| Boustani, M., C. Schubert and Y. Sennour (2007)                                                                                                              | 3.55  | USA            | Clinical interventions in aging             | Non-empirical | Primary health care - dementia                             |
| Braa, J., O. Hanseth, A. Heywood, W. Mohammed and V. Shaw (2007)                                                                                             | 35.64 | Norway         | Mis quarterly                               | Non-empirical | Information systems implementation in developing countries |
| Bradley, E. H., L. A. Curry, L. A. Taylor, S. W. Pallas, K. Talbert-Slagle, C. Yuan, A. Fox, D. Minhas, D. K. Ciccone, D. Berg and R. Perez-Escamilla (2012) | 5.17  | USA            | Bmj open                                    | Empirical     | Community/ family health -LMIC                             |
| Brainard, J. and P. R. Hunter (2016)                                                                                                                         | 7.50  | United Kingdom | Implementation science                      | Review        | Research -diverse                                          |
| Brand, S. L., L. E. Fleming and K. M. Wyatt (2015)                                                                                                           | 0.33  | United Kingdom | The scientific world journal                | Non-empirical | Health care organisations - workplace wellbeing            |
| Brannon, S. D., P. Kemper and T. Barry (2009)                                                                                                                | 1.00  | USA            | Health care management review               | Empirical     | Management - health organisations                          |
| Brennan, C. (2016)                                                                                                                                           | 0     | USA            | Plastic surgical nursing                    | Non-empirical | Leadership                                                 |
| Breton, J. J. (1999)                                                                                                                                         | 0.37  | Canada         | Canadian journal of psychiatry              | Non-empirical | Mental health - health promotion                           |
| Bro, F. and J. Kragstrup (2003)                                                                                                                              | 0.20  | Denmark        | Scandinavian journal of primary health care | Non-empirical | Primary health care                                        |
| Brooks, E. and R. Geyer (2012)                                                                                                                               | 1.00  | United Kingdom | Journal of evaluation in clinical practice  | Non-empirical | Health system policy - drug advertising to consumers       |
| Brown, C. A. (2006)                                                                                                                                          | 4.50  | United Kingdom | Disability and rehabilitation               | Non-empirical | Rehabilitation - professionalism                           |
| Brown, C. A. and C. Richardson (2006)                                                                                                                        | 3.67  | United Kingdom | European journal of pain                    | Empirical     | MDT – pain                                                 |
| Browne, A. J., C. Varcoe, M. Ford-Gilboe, C. N. Wathen and E. R. Team (2015)                                                                                 | 5.33  | Canada         | International journal for equity in health  | Non-empirical | Primary care – equity                                      |
| Bujak, J. S. (1999)                                                                                                                                          | 0.63  | USA            | Physician executive                         | Non-empirical | Leadership - culture - medicine                            |
| Bujak, J. S. (2003)                                                                                                                                          | 2.47  | USA            | Frontiers of health service management      | Non-empirical | Leadership                                                 |

|                                                                                                                                     |      |                |                                                          |               |                                                          |
|-------------------------------------------------------------------------------------------------------------------------------------|------|----------------|----------------------------------------------------------|---------------|----------------------------------------------------------|
| Bullas, S. and J. Bryant (2007)                                                                                                     | 0.82 | United Kingdom | Studies in health information technology and informatics | Non-empirical | IT implementation                                        |
| Bungay, V. and J. Stevenson (2013)                                                                                                  | 0.40 | Canada         | Policy, politics, & nursing practice                     | Empirical     | Nurse leaders - reform                                   |
| Burke, J. P. and S. L. Pestotnik (1999)                                                                                             | 0.74 | USA            | Current opinion in infectious diseases                   | Non-empirical | Resistance                                               |
| Burman, C. J., M. Aphane and P. Delobelle (2015)                                                                                    | 3.33 | South Africa   | African journal of aids research                         | Non-empirical | Public health and health promotion - AIDS                |
| Burman, C. J., M. Aphane, O. Mtapuri and P. Delobelle (2015)                                                                        | 2.33 | South Africa   | Sahara-j: journal of social aspects of hiv/aids          | Non-empirical | Health promotion - HIV prevention                        |
| Burns, J. P. (2001)                                                                                                                 | 4.18 | USA            | Journal of nursing administration                        | Non-empirical | Leadership                                               |
| Butt, G., M. Markle-Reid and G. Browne (2008)                                                                                       | 5.80 | Canada         | International journal of integrated care                 | Review        | Integrated care - health and social service partnership  |
| Buttigieg, S. C., V. Cassar and J. W. Scully (2013)                                                                                 | 1.20 | United Kingdom | Journal of health organization and management            | Empirical     | Hospital, leadership, integrated care                    |
| Caffrey, L., C. Wolfe and C. McKevitt (2016)                                                                                        | 4.00 | United Kingdom | Health research policy and systems                       | Empirical     | Health system - implementation and working with research |
| Callahan, C. M., M. A. Boustani, M. Weiner, R. A. Beck, L. R. Livin, J. J. Kellams, D. R. Willis and H. C. Hendrie (2011)           | 9.13 | USA            | Aging & mental health                                    | Non-empirical | Primary care - dementia                                  |
| Canals L, M. and R. Solis (2005)                                                                                                    | 0.85 | Chile          | Revista médica de chile                                  | Non-empirical | Medicine                                                 |
| Carlos, D. M., E. M. M. de Padua, L. M. P. da Silva, M. A. I. Silva, W. E. U. Marques, M. N. D. Leitao and M. D. C. Ferriani (2017) | 1.00 | Brazil         | Journal of clinical nursing                              | Empirical     | Primary health care - family violence                    |
| Carney, T. J. and C. M. Shea (2017)                                                                                                 | 4.00 | USA            | Computational and mathematical methods in medicine       | Non-empirical | Public health - informatics                              |
| Chadwick, M. M. (2010)                                                                                                              | 3.88 | USA            | Aorn journal                                             | Non-empirical | Leadership - nursing                                     |
| Chaffee, M. W. and M. M. McNeill (2007)                                                                                             | 8.64 | USA            | Nursing outlook                                          | Non-empirical | Nursing                                                  |
| Chan, M. K., D. D. Meschino, D. Dath, J. Busari, J. D. Bohnen, L. M. Samson, A. Matlow and M. Sanchez-Mendiola (2016)               | 5.50 | Canada         | Leadership in health services                            | Non-empirical | Education - medical - leadership                         |

|                                                                                                                                                                                           |       |                |                                                  |               |                                                          |
|-------------------------------------------------------------------------------------------------------------------------------------------------------------------------------------------|-------|----------------|--------------------------------------------------|---------------|----------------------------------------------------------|
| Chandler, J., J. Rycroft-Malone, C. Hawkes and J. Noyes (2016)                                                                                                                            | 10.67 | United Kingdom | Journal of advanced nursing                      | Empirical     | Health system - improvement and implementation           |
| Checkland, K., I. McDermott, A. Coleman, L. Warwick-Giles, D. Bramwell, P. Allen and S. Peckham (2018)                                                                                    | 0     | United Kingdom | Public money & management                        | Empirical     | Primary care - oversight, planning, management           |
| Chen, D. T., P. H. Werhane and A. E. Mills (2007)                                                                                                                                         | 1.73  | USA            | Critical care medicine                           | Non-empirical | Hospital - ICU/critical care medicine                    |
| Chinnis, A. and K. R. White (1999)                                                                                                                                                        | 1.26  | USA            | Journal of emergency medicine                    | Non-empirical | Hospital - emergency department                          |
| Chou, S.-M. (2004)                                                                                                                                                                        | 0.07  | China          | Hu li za zhi the journal of nursing              | Non-empirical | Nursing                                                  |
| Christian, C. S. and N. Crisp (2012)                                                                                                                                                      | 1.00  | South Africa   | Development southern africa                      | Empirical     | Public health                                            |
| Chughtai, S. and K. Blanchet (2017)                                                                                                                                                       | 5.00  | Pakistan       | Health policy and planning                       | Review        | Public health                                            |
| Ciemins, E. L., J. Brant, D. Kersten, E. Mullette and D. Dickerson (2016)                                                                                                                 | 2.50  | USA            | Journal of palliative medicine                   | Empirical     | Palliative care - interdisciplinary team work            |
| Clancy, T. R. (2014)                                                                                                                                                                      | 1.00  | USA            | Journal of nursing administration                | Non-empirical | Nursing - workflow                                       |
| Clancy, T. R., C. White Delaney, B. Morrison and J. K. Gunn (2006)                                                                                                                        | 3.50  | USA            | Journal of nursing administration                | Non-empirical | Nursing - documentation                                  |
| Clarke, J. R. (2005)                                                                                                                                                                      | 1.62  | USA            | Journal of the american college of surgeons      | Non-empirical | Hospital - surgery - patient safety                      |
| Cloninger, C. R. (2013)                                                                                                                                                                   | 3.40  | USA            | International journal of person centred medicine | Non-empirical | Health promotion - chronic disease - person-centred care |
| Cockings, J. G., D. A. Cook and R. K. Iqbal (2006)                                                                                                                                        | 2.42  | United Kingdom | Critical care                                    | Empirical     | Hospital - quality and surveillance                      |
| Colon-Emeric, C. S., D. Lekan-Rutledge, Q. Utley-Smith, N. Ammarell, D. Bailey, M. L. Piven, K. Corazzini and R. A. Anderson (2006)                                                       | 3.25  | USA            | Health care management review                    | Empirical     | Nursing homes                                            |
| Colon-Emeric, C. S., K. Corazzini, E. S. McConnell, W. Pan, M. Toles, R. Hall, M. P. Cary, M. Batchelor-Murphy, T. Yap, A. L. Anderson, A. Burd, S. Amarasekara and R. A. Anderson (2017) | 2.00  | USA            | Jama internal medicine                           | Empirical     | Nursing homes                                            |



|                                                                                                                                                                                                                                                                         |                                                                                                                                          |       |                |                                            |                    |                                                                 |
|-------------------------------------------------------------------------------------------------------------------------------------------------------------------------------------------------------------------------------------------------------------------------|------------------------------------------------------------------------------------------------------------------------------------------|-------|----------------|--------------------------------------------|--------------------|-----------------------------------------------------------------|
| 1<br>2<br>3<br>4<br>5<br>6<br>7<br>8<br>9<br>10<br>11<br>12<br>13<br>14<br>15<br>16<br>17<br>18<br>19<br>20<br>21<br>22<br>23<br>24<br>25<br>26<br>27<br>28<br>29<br>30<br>31<br>32<br>33<br>34<br>35<br>36<br>37<br>38<br>39<br>40<br>41<br>42<br>43<br>44<br>45<br>46 | Colon-Emeric, C. S., N. Ammarell, C. Bailey, C. Kirsten, D. Lekan-Rutledge, M. Piven and R. Anderson (2005)                              | 0.08  | USA            | Journal of the american geriatrics society | Unable to classify | Nursing                                                         |
|                                                                                                                                                                                                                                                                         | Colon-Emeric, C. S., N. Ammarell, D. Bailey, K. Corazzini, D. Lekan-Rutledge, M. L. Piven, Q. Utley-Smith and R. A. Anderson (2006)      | 6.58  | USA            | Qualitative health research                | Empirical          | Nursing home - communication between medicine-nursing           |
|                                                                                                                                                                                                                                                                         | Cooper, A. and B. Wren (2012)                                                                                                            | 1.33  | United Kingdom | Psychoanalytic psychotherapy               | Non-empirical      | Mental health                                                   |
|                                                                                                                                                                                                                                                                         | Cooper, H. and E. Spencer-Dawe (2006)                                                                                                    | 7.75  | United Kingdom | Journal of integrated care                 | Empirical          | Education - interprofessional                                   |
|                                                                                                                                                                                                                                                                         | Cooper, H. and R. Geyer (2008)                                                                                                           | 3.30  | United Kingdom | Social science & medicine                  | Non-empirical      | Education                                                       |
|                                                                                                                                                                                                                                                                         | Cooper, H. and R. Geyer (2009)                                                                                                           | 2.33  | United Kingdom | Journal of evaluation in clinical practice | Non-empirical      | Chronic disease management – diabetes                           |
|                                                                                                                                                                                                                                                                         | Cooper, H., E. Spencer-Dawe and E. McLean (2005)                                                                                         | 10.15 | United Kingdom | Journal of interprofessional care          | Empirical          | Education - medicine, nursing, physiotherapy, OT undergraduates |
|                                                                                                                                                                                                                                                                         | Copelli, F. H. d. S., R. J. T. d. Oliveira, C. M. S. d. Oliveira, B. H. S. Meirelles, A. L. S. F. d. Mello and A. L. P. Magalhães (2016) | 1.50  | Brazil         | Aquichan                                   | Review             | Nursing - leadership                                            |
|                                                                                                                                                                                                                                                                         | Copnell, B. (1998)                                                                                                                       | 1.00  | Australia      | Journal of advanced nursing                | Non-empirical      | Nursing - nursing knowledge                                     |
|                                                                                                                                                                                                                                                                         | Coppa, D. F. (1993)                                                                                                                      | 1.84  | USA            | Journal of advanced nursing                | Non-empirical      | Nursing                                                         |
|                                                                                                                                                                                                                                                                         | Cornforth, A. (2013)                                                                                                                     | 1.60  | United Kingdom | British journal of nursing                 | Non-empirical      | Primary care - self-management – COPD                           |
|                                                                                                                                                                                                                                                                         | Crabtree, B. F. (2003)                                                                                                                   | 3.13  | USA            | Health care management review              | Non-empirical      | Primary care                                                    |
|                                                                                                                                                                                                                                                                         | Crabtree, B. F., P. A. Nutting, W. L. Miller, R. R. McDaniel, K. C. Stange, C. R. Jaen and E. Stewart (2011)                             | 17.57 | USA            | Medical care                               | Non-empirical      | Primary care - change/improvement                               |
|                                                                                                                                                                                                                                                                         | Crabtree, B. F., W. L. Miller and K. C. Stange (2001)                                                                                    | 9.53  | USA            | Journal of family practice                 | Empirical          | Primary care                                                    |
|                                                                                                                                                                                                                                                                         | Cruz, R. A., E. L. Araujo, N. M. Nascimento, R. J. Lima, J. R. Franca and J. D. Oliveira (2017)                                          | 1.00  | Brazil         | Revista brasileira de enfermagem           | Unable to classify | Nursing - education                                             |



|                                                                                                                             |      |                 |                                                |               |                                                            |
|-----------------------------------------------------------------------------------------------------------------------------|------|-----------------|------------------------------------------------|---------------|------------------------------------------------------------|
| Cucolo, D. F. and M. G. Perroca (2015)                                                                                      | 3.67 | Brazil          | Acta paulista de enfermagem                    | Empirical     | Nursing                                                    |
| Curtis, S. and M. Riva (2010)                                                                                               | 8.63 | United Kingdom  | Progress in human geography                    | Non-empirical | Human geography and health systems                         |
| Curtis, S. and M. Riva (2010)a                                                                                              | 4.63 | United Kingdom  | Progress in human geography                    | Non-empirical | Human geography and health systems and policy              |
| Curtis, S., K. Oven, J. Wistow, C. Dunn and L. Dominelli (2018)                                                             | 3.00 | United Kingdom  | Environment and planning c: politics and space | Empirical     | Aged - health and social care                              |
| da Silva, A. L. and M. G. de Freitas (2010)                                                                                 | 0.50 | Brazil          | Revista da escola de enfermagem da usp         | Empirical     | Education                                                  |
| D'Agata, A. L. and J. M. McGrath (2016)                                                                                     | 2.50 | USA             | Advances in nursing science                    | Non-empirical | Hospital - neonatal ICU                                    |
| Dattee, B. and J. Barlow (2010)                                                                                             | 4.50 | United Kingdom  | Journal of health services research and policy | Empirical     | Whole system change                                        |
| Dattee, B. and J. Barlow (2017)                                                                                             | 1.00 | France          | Organization science                           | Empirical     | Healthcare system                                          |
| Davis, B. and D. Sumara (2010)                                                                                              | 9.25 | Canada          | Journal of evaluation in clinical practice     | Non-empirical | Research - education                                       |
| de Bock, B. A., D. L. Willems and H. C. Weinstein (2018)                                                                    | 1.00 | The Netherlands | Journal of evaluation in clinical practice     | Empirical     | Hospital - ICU, decision making                            |
| De Simone, J. (2006)                                                                                                        | 2.33 | Italy           | Journal of evaluation in clinical practice     | Non-empirical | Evidence-based medicine                                    |
| De Vito, E. L. (2016)                                                                                                       | 0    | Argentina       | Medicina                                       | Non-empirical | Medicine                                                   |
| de Zulueta, P. C. (2016)                                                                                                    | 9.50 | United Kingdom  | Journal of healthcare leadership               | Non-empirical | Leadership - compassionate leadership                      |
| deMattos, P. C., D. M. Miller and E. H. Park (2012)                                                                         | 2.83 | USA             | Management decision                            | Non-empirical | Hospital - trauma- decision making                         |
| Deutsch, E. S., Y. Dong, L. P. Halamek, M. A. Rosen, J. M. Taekman and J. Rice (2016)                                       | 2.50 | USA             | Human factors                                  | Non-empirical | Education                                                  |
| Doebbeling, B. N. and M. E. Flanagan (2011)                                                                                 | 1.86 | USA             | Medical care                                   | Non-empirical | Healthcare systems                                         |
| Doll, W. E. and D. Trueit (2010)                                                                                            | 5.88 | USA             | Journal of evaluation in clinical practice     | Non-empirical | Healthcare professionals broadly                           |
| Donaldson, A., E. Lank and J. Maher (2005)                                                                                  | 1.85 | United Kingdom  | Journal of change management                   | Non-empirical | Education and learning - communities of practice in cancer |
| Donini, L. M., R. D. Grave, A. Caretto, L. Lucchin, N. Melchionda, E. Nisoli, P. Sbraccia, A. Lenzi and M. Cuzzolaro (2014) | 1.75 | Italy           | Eating and weight disorders                    | Non-empirical | Health condition and its management - obesity              |

|    |                                                                                               |       |                |                                                     |                    |                                            |
|----|-----------------------------------------------------------------------------------------------|-------|----------------|-----------------------------------------------------|--------------------|--------------------------------------------|
| 1  | Donnelly, F. and R. Wiechula (2012)                                                           | 2.17  | Australia      | Nurse education today                               | Non-empirical      | Education - nurse placement                |
| 2  | Dreher, M. C., P. Clinton and A. Sperhac (2014)                                               | 2.50  | USA            | Journal of professional nursing                     | Non-empirical      | Education                                  |
| 3  | Dunn, K. S. and C. K. Riley-Doucet (2017)                                                     | 0     | USA            | Nurse educator                                      | Unable to classify | Nursing                                    |
| 4  | Durie, R. and K. Wyatt (2007)                                                                 | 3.18  | United Kingdom | Social science & medicine                           | Empirical          | Health geography                           |
| 5  | Durie, R. and K. Wyatt (2013)                                                                 | 4.20  | United Kingdom | Critical public health                              | Empirical          | Community and public health                |
| 6  | Dyck, L. R., A. Caron and D. Aron (2006)                                                      | 1.58  | USA            | Journal of management development                   | Non-empirical      | Change/improvement                         |
| 7  | Edgren, L. (2008)                                                                             | 10.10 | Sweden         | International journal of integrated care            | Non-empirical      | Integrated care                            |
| 8  | Edgren, L. and K. Barnard (2012)                                                              | 8.33  | Sweden         | Leadership in health services                       | Non-empirical      | Health and social care integration         |
| 9  | Eika, M., B. Dale, G. A. Espnes and S. Hvalvik (2015)                                         | 3.67  | Norway         | Bmc health services research                        | Empirical          | Nursing homes - nursing - care transitions |
| 10 | Ellis, B. (2010)                                                                              | 4.13  | United Kingdom | Informatics in primary care                         | Empirical          | Primary care                               |
| 11 | Ellis, B. and S. I. Herbert (2011)                                                            | 6.43  | United Kingdom | Informatics in primary care                         | Non-empirical      | Primary care - clinical governance         |
| 12 | Ellis, L. A., K. Churruca and J. Braithwaite (2017)                                           | 2.00  | Australia      | International journal of mental health systems      | Non-empirical      | Mental health services                     |
| 13 | Ellsbury, D. L. (2010)                                                                        | 0.88  | USA            | Clinics in perinatology                             | Non-empirical      | Hospital - neonatal medicine               |
| 14 | Erdek, M. A. and P. J. Pronovost (2004)                                                       | 7.50  | USA            | International journal for quality in health care    | Empirical          | Hospital - pain assessment                 |
| 15 | Erdmann, A. L., K. C. d. Nascimento, G. Marcelino and J. A. Ribeiro (2005)                    | 1.85  | Brazil         | Fascicles of escola anna nery revista de enfermagem | Empirical          | Education - graduate nurses                |
| 16 | Essen, A. and S. Lindblad (2013)                                                              | 7.33  | Sweden         | Social science & medicine                           | Empirical          | Rheumatology                               |
| 17 | Fajardo Ortiz, G. (2013)                                                                      | 0     | Mexico         | Ludus vitalis                                       | Non-empirical      | Medicine                                   |
| 18 | Fajardo-Ortiz, G., M. A. Fernandez-Ortega, A. Ortiz-Montalvo and R. A. Olivares-Santos (2015) | 0.67  | Mexico         | Cirugía y cirujanos (english edition)               | Non-empirical      | Health systems                             |
| 19 | Farmer, E. A., J. D. Beard, W. D. Dauphinee, T. LaDuca and K. V. Mann (2002)                  | 2.19  | Australia      | Medical education                                   | Non-empirical      | Medical performance assessment             |

|                                                                                                                           |       |                |                                                 |               |                                          |
|---------------------------------------------------------------------------------------------------------------------------|-------|----------------|-------------------------------------------------|---------------|------------------------------------------|
| Favaretti, C. (2013)                                                                                                      | 0.40  | Italy          | Recenti progressi in medicina                   | Non-empirical | Health care organisations generally      |
| Fennell, M. L. and C. M. Adams (2011)                                                                                     | 2.43  | USA            | Annual review of sociology                      | Non-empirical | Health care organisations generally      |
| Fenwick, T. (2012)                                                                                                        | 6.83  | United Kingdom | Journal of education and work                   | Non-empirical | Education - learning for collaboration   |
| Fenwick, T. and M. A. Dahlgren (2015)                                                                                     | 16.33 | United Kingdom | Medical education                               | Non-empirical | Education                                |
| Fernandez, A., J. Sturmberg, S. Lukersmith, R. Madden, G. Torkfar, R. Colagiuri and L. Salvador-Carulla (2015)            | 10.67 | Australia      | Health research policy and systems              | Non-empirical | Evidence-based medicine movement history |
| Florczyk, K., M. Poradzisz and S. Hampson (2012)                                                                          | 1.00  | USA            | Nursing science quarterly                       | Non-empirical | Nursing profession                       |
| Fontanesi, J., A. Martinez, T. O. Boyo and R. Gish (2015)                                                                 | 0.33  | USA            | The journal of medical practice management: mpm | Empirical     | Quality improvement                      |
| Forbes-Thompson, S., T. Leiker and M. R. Bleich (2007)                                                                    | 4.91  | USA            | Health care management review                   | Empirical     | Nursing homes                            |
| Ford, R. (2009)                                                                                                           | 5.56  | USA            | Health services management research             | Empirical     | Leadership                               |
| Frame, A., M. LaMantia, B. B. Reddy Bynagari, P. Dexter and M. Boustani (2013)                                            | 2.20  | USA            | Egems                                           | Empirical     | Primary care - EHR – improvement         |
| Fraser, S. W. and T. Greenhalgh (2001)                                                                                    | 50.59 | United Kingdom | Bmj open                                        | Non-empirical | Education                                |
| Frasso, R., A. Golinkoff, H. Klusaritz, K. Kellom, H. Kollar-McArthur, M. Miller-Day, R. Gabbay and P. F. Cronholm (2017) | 1.00  | USA            | Applied nursing research                        | Empirical     | Primary care - nurse-led practices       |
| Freddi, G. and J. L. Roman-Pumar (2011)                                                                                   | 2.00  | Italy          | Annali dell istituto superiore di sanita        | Non-empirical | Evidence-based medicine                  |
| Freed, D. H. (1995)                                                                                                       | 0     | USA            | Hospital material management quarterly          | Non-empirical | Health care generally - quality          |
| Friel, S., L. Hattersley and R. Townsend (2015)                                                                           | 9.33  | Australia      | Annual review of public health                  | Non-empirical | Public health - trade                    |
| Frye, A. W. and P. A. Hemmer (2012)                                                                                       | 28.00 | USA            | Medical teacher                                 | Non-empirical | Education                                |

|                                                                                                                                                                    |       |                |                                            |               |                                                 |
|--------------------------------------------------------------------------------------------------------------------------------------------------------------------|-------|----------------|--------------------------------------------|---------------|-------------------------------------------------|
| Gardam, M., L. Gitterman, L. Rykert and E. Vicencio (2017)                                                                                                         | 0     | Canada         | Healthcare papers                          | Non-empirical | Health care delivery - safety                   |
| Gary, J. C. (2014)                                                                                                                                                 | 1.25  | USA            | Dimensions of critical care nursing        | Empirical     | Improving patient-centred care - nursing - ICU  |
| Gatrell, A. C. (2005)                                                                                                                                              | 13.54 | United Kingdom | Social science & medicine                  | Non-empirical | Health geography                                |
| Gear, C., J. Koziol-McLain, D. Wilson and F. Clark (2016)                                                                                                          | 1.00  | New Zealand    | Bmc family practice                        | Empirical     | Primary care - family violence                  |
| Geary, C. R. and K. L. Schumacher (2012)                                                                                                                           | 7.17  | USA            | Advances in nursing science                | Non-empirical | Care transitions                                |
| Ghazzawi, A., C. Kuziemyk and T. O'Sullivan (2016)                                                                                                                 | 3.50  | Canada         | Bmc health services research               | Empirical     | Stroke - rehabilitation - carers                |
| Glenn, L. A., J. Stocker-Schnieder, R. McCune, M. McClelland and D. King (2014)                                                                                    | 2.00  | USA            | Journal of advanced nursing                | Empirical     | Hospital - nursing maternity care during labour |
| Glynn, L. G. and R. Scully (2010)                                                                                                                                  | 1.00  | United Kingdom | International journal of clinical practice | Non-empirical | Healthcare generally                            |
| Goldberger, A. L. (1996)                                                                                                                                           | 39.59 | USA            | The lancet                                 | Non-empirical | Medical practice                                |
| Goldman, E., M. Plack, C. Roche, J. Smith and C. Turley (2009)                                                                                                     | 5.11  | USA            | Journal of workplace learning              | Empirical     | Hospital - emergency department/ learning       |
| Gonnering, R. S. (2010)                                                                                                                                            | 1.00  | USA            | Journal of surgical education              | Non-empirical | Education - surgical                            |
| Gonzalez, M. G., K. N. Kelly, A. M. Dozier, F. Fleming, J. R. T. Monson, A. Z. Becerra, C. T. Aquina, C. P. Probst, B. J. Hensley, N. Sevdalis and K. Noyes (2017) | 1.00  | USA            | Qualitative health research                | Empirical     | Hospital - surgical care – transitions          |
| Gordon, L., C. Rees, J. Ker and J. Cleland (2017)                                                                                                                  | 1.00  | United Kingdom | Advances in health sciences education      | Empirical     | Leadership                                      |
| Gormley, G. J. and T. Fenwick (2016)                                                                                                                               | 3.00  | United Kingdom | Perspectives on medical education          | Empirical     | Education - medical                             |
| Grady, C. M. (2016)                                                                                                                                                | 4.00  | Canada         | Leadership in health services              | Empirical     | Leadership - medical                            |
| Green, C. A., S. E. Estroff, B. J. H. Yarborough, M. Spofford, M. R. Solloway, R. S. Kitson and N. A. Perrin (2014)                                                | 5.75  | USA            | Schizophrenia bulletin                     | Non-empirical | Mental health care                              |
| Greene, R. A., E. Dasso, S. Ho and A. M. Genaidy (2014)                                                                                                            | 2.25  | USA            | Population health management               | Non-empirical | Health care systems - person-centred care       |

|                                                                                                                                                     |       |                |                                                                                  |                    |                                     |
|-----------------------------------------------------------------------------------------------------------------------------------------------------|-------|----------------|----------------------------------------------------------------------------------|--------------------|-------------------------------------|
| Greenhalgh, T., P. Plsek, T. Wilson, S. Fraser and T. Holt (2010)                                                                                   | 5.88  | United Kingdom | Journal of health services research and policy                                   | Non-empirical      | Research                            |
| Griffiths, F. and D. Byrne (1998)                                                                                                                   | 4.20  | United Kingdom | British journal of general practice                                              | Non-empirical      | Primary care                        |
| Griffiths, F. and G. North American Primary Care Research (2007)                                                                                    | 1.45  | United Kingdom | Annals of family medicine                                                        | Non-empirical      | Primary care                        |
| Grudniewicz, A., T. Tenbenschel, J. M. Evans, C. Steele Gray, G. R. Baker and W. P. Wodchis (2018)                                                  | 0     | Canada         | Social science & medicine                                                        | Empirical          | Health policy - integrated care     |
| Haffeld, J. (2012)                                                                                                                                  | 2.67  | Norway         | Global public health: an international journal for research, policy and practice | Non-empirical      | Global health system                |
| Haffeld, J. (2013)                                                                                                                                  | 1.40  | USA            | Reproductive health matters                                                      | Non-empirical      | Health systems - governance         |
| Haffeld, J. and H. Siem (2013)                                                                                                                      | 1.00  | Norway         | Current pharmogenomics and personalized medicine                                 | Unable to classify | Policy and governance international |
| Hafferty, F. W. and B. Castellani (2010)                                                                                                            | 13.50 | USA            | Academic medicine                                                                | Non-empirical      | Medical professionalism             |
| Hafferty, F. W. and D. Levinson (2008)                                                                                                              | 9.50  | USA            | Perspectives in biology and medicine                                             | Non-empirical      | Medicine - professionalism          |
| Haigh, C. (2002)                                                                                                                                    | 3.81  | United Kingdom | Journal of advanced nursing                                                      | Non-empirical      | Nursing                             |
| Haigh, C. A. (2008)                                                                                                                                 | 0.80  | United Kingdom | Journal of nursing management                                                    | Empirical          | Nursing - management                |
| Hall, P., L. Weaver and P. A. Grassau (2013)                                                                                                        | 4.40  | Canada         | Journal of interprofessional care                                                | Non-empirical      | Integrated care - education         |
| Hamilton, A. B., M. M. Farmer, T. Moin, E. P. Finley, A. J. Lang, S. M. Oishi, A. K. Huynh, J. Zuchowski, S. G. Haskell and B. Bean-Mayberry (2017) | 1.00  | USA            | Implementation science                                                           | Non-empirical      | Primary care - women's health       |
| Hammerly, M. (2002)                                                                                                                                 | 0.44  | USA            | American journal of medical quality                                              | Non-empirical      | Collaborative medicine              |
| Hanseth, O., E. Jacucci, M. Grisot and M. Aanestad (2006)                                                                                           | 21.75 | Norway         | Mis quarterly                                                                    | Empirical          | Hospital – HER                      |
| Hast, A. S., A. M. DiGioia, D. Thompson and G. Wolf (2013)                                                                                          | 3.00  | USA            | Journal of nursing administration                                                | Unable to classify | Organisational change               |

|                                                                                                                                                                                                                                                                                                                                   |       |           |                                                                                                    |               |                                            |
|-----------------------------------------------------------------------------------------------------------------------------------------------------------------------------------------------------------------------------------------------------------------------------------------------------------------------------------|-------|-----------|----------------------------------------------------------------------------------------------------|---------------|--------------------------------------------|
| Henriksen, E. and U. Rosenqvist (2003)                                                                                                                                                                                                                                                                                            | 2.33  | Sweden    | Health & social care in the community                                                              | Empirical     | Aged care                                  |
| Hill, P. S. (2011)                                                                                                                                                                                                                                                                                                                | 11.13 | Australia | Global public health: an international journal for research, policy and practice                   | Non-empirical | Governance - health care systems           |
| Hilts, L., M. Howard, D. Price, C. Risdon, G. Agarwal and A. Childs (2013)                                                                                                                                                                                                                                                        | 3.40  | Canada    | Family practice                                                                                    | Empirical     | Primary care                               |
| Ho, S. and L. G. Sandy (2014)                                                                                                                                                                                                                                                                                                     | 1.75  | USA       | Journal of general internal medicine                                                               | Non-empirical | Health care system - economics and funding |
| Hoben, M., P. G. Norton, L. R. Ginsburg, R. A. Anderson, G. G. Cummings, H. J. Lanham, J. E. Squires, D. Taylor, A. S. Wagg and C. A. Estabrooks (2017)                                                                                                                                                                           | 5.00  | Canada    | Trials                                                                                             | Non-empirical | Nursing home - quality and improvement     |
| Hodges, H. F. (2011)                                                                                                                                                                                                                                                                                                              | 7.43  | USA       | Journal of nursing education                                                                       | Empirical     | Education - nursing                        |
| Hoffman, E. (2000)                                                                                                                                                                                                                                                                                                                | 1.22  | USA       | Academic medicine                                                                                  | Non-empirical | Women's health - educating about           |
| Holden, L. M. (2005)                                                                                                                                                                                                                                                                                                              | 14.46 | USA       | Journal of advanced nursing                                                                        | Non-empirical | Nursing                                    |
| Holder, R. and C. Ramagem (2012)                                                                                                                                                                                                                                                                                                  | 2.17  | USA       | World hospitals and health services: the official journal of the international hospital federation | Non-empirical | Leadership                                 |
| Holmboe, E. S. (2018)                                                                                                                                                                                                                                                                                                             | 3.00  | USA       | Academic medicine                                                                                  | Non-empirical | Education - medicine                       |
| Homa, L., J. Rose, P. S. Hovmand, S. T. Cherng, R. L. Riolo, A. Kraus, A. Biswas, K. Burgess, H. Aungst, K. C. Stange, K. Brown, M. Brooks-Terry, E. Dec, B. Jackson, J. Gilliam, G. E. Kikano, A. Reichsman, D. Schaadt, J. Hilfer, C. Ticknor, C. V. Tyler, A. Van der Meulen, H. Ways, R. F. Weinberger and C. Williams (2015) | 5.00  | USA       | Annals of family medicine                                                                          | Empirical     | Primary care                               |
| Hopkinson, S. G. and D. L. Wiegand (2017)                                                                                                                                                                                                                                                                                         | 0     | USA       | Journal of clinical nursing                                                                        | Empirical     | Nursing practice                           |
| Horvat, A. and J. Filipovic (2018)                                                                                                                                                                                                                                                                                                | 5.00  | Serbia    | Journal of evaluation in clinical practice                                                         | Empirical     | Leadership                                 |
| Hunt, S. R., K. Corazzini and R. A. Anderson (2014)                                                                                                                                                                                                                                                                               | 4.50  | USA       | Journal of applied gerontology                                                                     | Empirical     | Nursing homes - management - care quality  |



|                                                                                                                                   |      |                              |                                                 |               |                                                     |
|-----------------------------------------------------------------------------------------------------------------------------------|------|------------------------------|-------------------------------------------------|---------------|-----------------------------------------------------|
| Hutchison, D. (1994)                                                                                                              | 0.54 | USA                          | Quality progress                                | Non-empirical | Quality management - health care organisation       |
| Innes, A. D., P.D. Campion and F.E. Griffiths (2005)                                                                              | 8.15 | United Kingdom               | British journal of general practice             | Non-empirical | Clinical consultation                               |
| Irimu, G. W., A. Greene, D. Gathara, H. Kihara, C. Maina, D. Mbori-Ngacha, D. Zurovac, M. Santau, J. Todd and M. English (2014)   | 1.50 | Kenya                        | Bmc health services research                    | Empirical     | Implementation of CPGs                              |
| Issel, L. M. and R. A. Anderson (2001)                                                                                            | 0.88 | USA                          | Research in nursing and health                  | Empirical     | Community case managers - nursing - decision making |
| James, K. M. (2010)                                                                                                               | 3.38 | USA                          | Creative nursing                                | Non-empirical | Education - nursing                                 |
| Jana, M., L. Letsela, E. Scheepers and R. Weiner (2015)                                                                           | 1.00 | South Africa                 | Journal of health communication                 | Non-empirical | Public health - health promotion/communication      |
| Jolley, G. (2014)                                                                                                                 | 9.00 | Australia                    | Evaluation and program planning                 | Non-empirical | Health promotion - community care                   |
| Joly, B. M., M. Booth, P. Mittal and G. Shaler (2012)                                                                             | 3.17 | USA                          | Evaluation & the health professions             | Non-empirical | Quality improvement                                 |
| Jorm, C. and C. Roberts (2018)                                                                                                    | 3.00 | Australia                    | Academic medicine                               | Non-empirical | Education - evaluation                              |
| Jorm, C., G. Nisbet, C. Roberts, C. Gordon, S. Gentilcore and T. F. Chen (2016)                                                   | 4.50 | Australia                    | Bmc medical education                           | Empirical     | Education - interprofessional learning              |
| Joshi, R., D. Joshi and P. Cheriya (2017)                                                                                         | 5.00 | USA                          | Patient preference and adherence                | Empirical     | Diabetes management - technology app                |
| Juarez, F. (2010)                                                                                                                 | 0    | Colombia                     | International journal of psychological research | Empirical     | Health system - economic                            |
| Kaehne, A. (2016)                                                                                                                 | 3.00 | United Kingdom               | Journal of integrated care                      | Non-empirical | Programme evaluation (integration programmes)       |
| Kapp, J. M., E. J. Simoes, A. DeBiasi and S. J. Kravet (2017)                                                                     | 4.00 | USA                          | Systems research and behavioural science        | Non-empirical | Population health - improvement                     |
| Karam, E., M. C. Levesque, G. Jacquemin, A. Delure, I. Robidoux, M. T. Laramée, A. Odobescu, P. G. Harris and A. M. Danino (2014) | 1.50 | Canada                       | Annals of burns and fire disasters              | Empirical     | Multidisciplinary teams                             |
| Karemere, H. and J. Macq (2014)                                                                                                   | 0.50 | Democratic Republic of Congo | Global health promotion                         | Empirical     | Hospital                                            |



|                                                                                                    |      |                              |                                            |               |                                                                                |
|----------------------------------------------------------------------------------------------------|------|------------------------------|--------------------------------------------|---------------|--------------------------------------------------------------------------------|
| Karemere, H., J. B. Kahindo, N. Ribesse and J. Macq (2013)                                         | 0.40 | Democratic Republic of Congo | Medecine et sante tropicales               | Non-empirical | Hospital - governance                                                          |
| Karemere, H., N. Ribesse, B. Marchal and J. Macq (2015)                                            | 1.00 | Democratic Republic of Congo | Conflict and health                        | Empirical     | Hospital                                                                       |
| Karemere, H., N. Ribesse, J.-B. Kahindo and J. Macq (2015)                                         | 1.00 | Democratic Republic of Congo | The pan african medical journal            | Empirical     | Hospital                                                                       |
| Katerndahl, D., R. Wood and C. R. Jaen (2017)                                                      | 0    | USA                          | Journal of evaluation in clinical practice | Empirical     | Ambulatory care                                                                |
| Kernick, D. (2006)                                                                                 | 7.75 | United Kingdom               | Family practice                            | Non-empirical | Health service generally                                                       |
| Kernick, D. and A. Mitchell (2010)                                                                 | 1.56 | United Kingdom               | Journal of interprofessional care          | Non-empirical | Co-production - patient-centredness                                            |
| Khan, B. A., S. Lasiter and M. A. Boustani (2015)                                                  | 0    | USA                          | The american journal of nursing            | Non-empirical | Hospital - ICU                                                                 |
| Khan, S., A. Vandermorris, J. Shepherd, J. W. Begun, H. J. Lanham, M. Uhl-Bien and W. Berta (2018) | 0    | Canada                       | Bmc health services research               | Non-empirical | Healthcare generally                                                           |
| Khan, Y., S. Sanford, D. Sider, K. Moore, G. Garber, E. de Villa and B. Schwartz (2017)            | 0    | Canada                       | Bmc health services research               | Empirical     | Hospital and public health - emergency departments during "emerging incidents" |
| Khayal, I. S. and A. M. Farid (2018)                                                               | 2.00 | USA                          | Complexity                                 | Non-empirical | Health care systems - chronic care                                             |
| Killingsworth, B., H. E. Newkirk and E. Seeman (2006)                                              | 2.08 | USA                          | Health care management review              | Non-empirical | Hospital - strategic information systems                                       |
| Kingsley, P. and E. M. Taylor (2017)                                                               | 9.00 | United Kingdom               | Parasitology                               | Non-empirical | Health care systems - integration                                              |
| Koerich, M. S., D. S. Backes, K. C. d. Nascimento and A. L. Erdmann (2007)                         | 3.82 | Brazil                       | Acta paulista de enfermagem                | Empirical     | Hospital - nursing assistant                                                   |
| Koerner, J. (2009)                                                                                 | 1.11 | USA                          | Creative nursing                           | Non-empirical | Nursing - decision making                                                      |
| Koerner, J. G. (1996)                                                                              | 0.36 | USA                          | Nursing administration quarterly           | Non-empirical | Nursing                                                                        |

|                                                                                                                                             |      |                |                                               |               |                                            |
|---------------------------------------------------------------------------------------------------------------------------------------------|------|----------------|-----------------------------------------------|---------------|--------------------------------------------|
| Kottke, T. E., J. A. Huebsch, P. McGinnis, J. M. Nichols, E. D. Parker, J. O. Tillema and M. V. Maciosek (2016)                             | 2.00 | USA            | The permanente journal                        | Empirical     | Primary care - collaboration               |
| Kramer, M., B. B. Brewer, D. Halfer, P. Maguire, S. Beausoleil, K. Claman, M. Macphee and J. B. Duchscher (2013)                            | 4.40 | USA            | Journal of nursing management                 | Empirical     | Nursing                                    |
| Kuipers, P., D. Harvey, M. Lindeman and K. Stothers (2014)                                                                                  | 1.25 | AUstralia      | Rural and remote health                       | Non-empirical | Workforce - rural - education and training |
| Kuziemy, C. (2016)                                                                                                                          | 6.33 | Canada         | Healthcare management forum                   | Non-empirical | Decision making                            |
| Kuziemy, C. E., E. M. Borycki and A. W. Kushniruk (2016)                                                                                    | 0.50 | Canada         | Nursing informatics                           | Non-empirical | Health information technology              |
| Lachman, P., A. Jayadev and M. Rahi (2014)                                                                                                  | 3.50 | United Kingdom | Early human development                       | Non-empirical | Hospital - NICU                            |
| Laliberte, M., D. E Feldman, B. Williams-Jones and M. Hunt (2018)                                                                           | 0    | Canada         | Physiotherapy theory and practice             | Empirical     | Physiotherapy - prioritising care          |
| Lalley, C. (2014)                                                                                                                           | 1.75 | USA            | Nursing administration quarterly              | Empirical     | Nursing - leadership - workarounds         |
| Lamarche, P. and L. Maillet (2016)                                                                                                          | 1.00 | Canada         | Journal of health organization and management | Non-empirical | Primary care                               |
| Landis-Lewis, Z., R. Manjomo, O. J. Gadabu, M. Kam, B. N. Simwaka, S. L. Zickmund, F. Chimbwandira, G. P. Douglas and R. S. Jacobson (2015) | 3.67 | USA            | International journal of medical informatics  | Empirical     | Health system - Malawi EMR implementation  |
| Lanham, H. J., L. K. Leykum, B. S. Taylor, C. J. McCannon, C. Lindberg and R. T. Lester (2013)                                              | 15.6 | USA            | Social science & medicine                     | Non-empirical | Health care systems                        |
| Larkin, D. J., R. C. Swanson, S. Fuller and D. A. Cortese (2016)                                                                            | 7.00 | USA            | Journal of evaluation in clinical practice    | Non-empirical | Health system - US and affordable care act |
| Laudenslager, M. L. (2014)                                                                                                                  | 3.25 | USA            | Brain, behavior, and immunity                 | Non-empirical | Caregivers                                 |
| Laurenson, M., T. Heath and S. Gribbin (2012)                                                                                               | 0.60 | United Kingdom | Journal of healthcare leadership              | Empirical     | Education - leadership                     |

|                                                                                                                                                           |       |                |                                        |               |                                                                   |
|-----------------------------------------------------------------------------------------------------------------------------------------------------------|-------|----------------|----------------------------------------|---------------|-------------------------------------------------------------------|
| Learmonth, A. M., E. J. Henderson and D. J. Hunter (2017)                                                                                                 | 0     | United Kingdom | Journal of public health               | Empirical     | Public health                                                     |
| Lefroy, J. and S. Yardley (2015)                                                                                                                          | 3.00  | United Kingdom | Medical education                      | Non-empirical | Education                                                         |
| Lemak, C. H. and E. Goodrick (2003)                                                                                                                       | 1.67  | USA            | Health care management review          | Empirical     | Primary care - dental, medical, social for low income populations |
| Lessard, C. (2007)                                                                                                                                        | 6.09  | Canada         | Social science & medicine              | Non-empirical | Research - economic evaluation                                    |
| Lett, M. (2001)                                                                                                                                           | 0.53  | Australia      | Australian journal of advanced nursing | Non-empirical | Nursing practice                                                  |
| Leykum, L. K., H. J. Lanham, J. A. Pugh, M. Parchman, R. A. Anderson, B. F. Crabtree, P. A. Nutting, W. L. Miller, K. C. Stange and R. R. McDaniel (2014) | 8.00  | USA            | Implementation science                 | Empirical     | Improvement                                                       |
| Leykum, L. K., J. A. Pugh, H. J. Lanham, J. Harmon and R. R. McDaniel (2009)                                                                              | 9.11  | USA            | Implementation science                 | Non-empirical | Implementation - evidence-based practice                          |
| Leykum, L. K., J. Pugh, V. Lawrence, M. Parchman, P. H. Noel, J. Cornell and R. R. McDaniel (2007)                                                        | 6.82  | USA            | Implementation science                 | Review        | Diabetes care                                                     |
| Lindberg, C. and M. Schneider (2013)                                                                                                                      | 2.60  | USA            | Leadership                             | Empirical     | Leadership                                                        |
| Lindberg, C., A. Herzog, M. Merry and J. Goldstein (1998)                                                                                                 | 0.25  | USA            | Physician executive                    | Non-empirical | Leadership                                                        |
| Litaker, D., A. Tomolo, V. Liberatore, K. C. Stange and D. Aron (2006)                                                                                    | 11.83 | USA            | Journal of general internal medicine   | Non-empirical | Primary care - quality improvement                                |
| Liu, Y. (2008)                                                                                                                                            | 2.20  | USA            | Journal of nursing management          | Non-empirical | Nursing - communication - decision making - cross culture         |
| Liu, Z. C., D. Rexachs, F. Epelde and E. Luque (2017)                                                                                                     | 3.00  | Spain          | Journal of computational science       | Empirical     | Hospital - emergency department                                   |
| Longo, F. (2007)                                                                                                                                          | 4.27  | Italy          | Health care management review          | Non-empirical | Leadership - change management                                    |
| Lorthios-Guilledroit, A., L. Richard and J. Filiatrault (2018)                                                                                            | 1.00  | Canada         | Evaluation and program planning        | Review        | Health promotion - community care                                 |
| Luria, J. W., S. E. Muething, P. J. Schoettker and U. R. Kotagal (2006)                                                                                   | 6.08  | USA            | Pediatric clinics of north america     | Non-empirical | Safety - paediatrics                                              |

|                                                                                                                                                     |      |                |                                                         |               |                                                                                                          |
|-----------------------------------------------------------------------------------------------------------------------------------------------------|------|----------------|---------------------------------------------------------|---------------|----------------------------------------------------------------------------------------------------------|
| MacLean, S., L. Berends and J. Mugavin (2013)                                                                                                       | 0.67 | Australia      | Australian journal of primary health                    | Empirical     | Primary care - drug and alcohol - improvement                                                            |
| Mahajan, A., S. D. Islam, M. J. Schwartz and M. Cannesson (2017)                                                                                    | 0    | USA            | Anesthesia & analgesia                                  | Non-empirical | Hospital - perioperative services - process improvement                                                  |
| Marchal, B., S. Belle, V. De Brouwere and S. Witter (2013)                                                                                          | 3.40 | Belgium        | Bmc health services research                            | Non-empirical | Health care policy                                                                                       |
| Mark, A. and M. Jones (2013)                                                                                                                        | 1.00 | United Kingdom | The international journal of health planning management | Non-empirical | Health care systems - instability/disturbance                                                            |
| Markham, F. W. (1998)                                                                                                                               | 0.50 | USA            | Theoretical medicine and bioethics                      | Non-empirical | Education - medical                                                                                      |
| Marks, E. (2013)                                                                                                                                    | 3.80 | USA            | Jama internal medicine                                  | Non-empirical | Hospital - readmission rates                                                                             |
| Marsland, S. and L. Buchan (2004)                                                                                                                   | 0.93 | United Kingdom | Medinfo                                                 | Non-empirical | Health informatics                                                                                       |
| Martin, C. and J. Sturmberg (2009)                                                                                                                  | 6.89 | Canada         | Journal of evaluation in clinical practice              | Non-empirical | Primary care - chronic care (health promotion, prevention, self-management, disease control. Treatment). |
| Martin, C. M. and J. P. Sturmberg (2005)                                                                                                            | 5.92 | Canada         | Medical journal of australia                            | Non-empirical | Primary care                                                                                             |
| Mash, B. J., P. Mayers, H. Conradie, A. Orayn, M. Kuiper and J. Marais (2008)                                                                       | 2.80 | South Africa   | Education for health                                    | Empirical     | Primary care                                                                                             |
| Matheson, A., K. Dew and J. Cumming (2009)                                                                                                          | 3.11 | New Zealand    | Health promotion journal of australia                   | Empirical     | Community health - health inequality                                                                     |
| Matlow, A. G., J. G. Wright, B. Zimmerman, K. Thomson and M. Valente (2006)                                                                         | 5.00 | Canada         | Quality and safety in health care                       | Non-empirical | Coordination of care, paediatrics                                                                        |
| Matthews, J. I. and P. T. Thomas (2007)                                                                                                             | 2.18 | United Kingdom | International journal of health care quality assurance  | Empirical     | Learning                                                                                                 |
| McAllister, C., L. K. Leykum, H. Lanham, H. S. Reisinger, J. L. Kohn, R. Palmer, C. Pezzia, M. Agar, M. Parchman, J. Pugh and R. R. McDaniel (2014) | 3.50 | USA            | Journal of hospital medicine                            | Empirical     | Hospital - teams relationship with patient outcomes                                                      |
| McConnell, E. S., D. Lekan-Rutledge, B. Nevidjon and R. Anderson (2004)                                                                             | 2.07 | USA            | Journal of nursing education                            | Non-empirical | Education - aged care                                                                                    |
| McDaniel, R. R. (1997)                                                                                                                              | 9.38 | USA            | Health care management review                           | Non-empirical | Leadership/management                                                                                    |

|                                                                                  |       |                |                                            |                    |                                         |
|----------------------------------------------------------------------------------|-------|----------------|--------------------------------------------|--------------------|-----------------------------------------|
| McDaniel, R. R., Jr. (1999)                                                      | 0.11  | USA            | Frontiers of health service management     | Unable to classify | Leadership/management                   |
| McDaniel, R. R., M. E. Jordan and B. F. Fleeman (2003)                           | 10.80 | USA            | Health care management review              | Non-empirical      | Learning                                |
| McHattie, L.-S., G. Cumming and T. French (2014)                                 | 3.00  | United Kingdom | Medicine 2.0                               | Non-empirical      | Person-centred care                     |
| McKenzie, A., E. Sokpo and A. Ager (2014)                                        | 1.00  | South Africa   | Journal of public health in africa         | Empirical          | Public health                           |
| McKeon, L. M., J. D. Oswaks and P. D. Cunningham (2006)                          | 5.75  | USA            | Critical nurse specialist                  | Non-empirical      | Hospital – teams                        |
| McKimm, J. and A. Till (2015).                                                   | 2.33  | United Kingdom | British journal of hospital medicine       | Non-empirical      | Clinical leadership                     |
| McKinney, S. H., K. Corazzini, R. A. Anderson, R. Sloane and N. G. Castle (2016) | 1.50  | USA            | Health care management review              | Empirical          | Nursing home - leadership – nursing     |
| McMurtry, A. (2010)                                                              | 5.33  | Canada         | Journal of interprofessional care          | Empirical          | Educational                             |
| McMurtry, A., S. Rohse and K. N. Kilgour (2016)                                  | 9.50  | Canada         | Medical education                          | Non-empirical      | Education - interprofessional learning  |
| Mennin, S. (2010)                                                                | 17.25 | USA            | Medical education                          | Non-empirical      | Education - learning - medicine         |
| Mennin, S. (2010)a                                                               | 3.63  | USA            | Journal of evaluation in clinical practice | Non-empirical      | Education                               |
| Merry, A. F. (2011)                                                              | 0.57  | New Zealand    | The journal of extracorporeal technology   | Non-empirical      | Safety - decision making                |
| Miles, A. (2009)                                                                 | 4.22  | United Kingdom | Journal of evaluation in clinical practice | Non-empirical      | Medicine and healthcare                 |
| Miller, W. L., B. F. Crabtree, P. A. Nutting, K. C. Stange and C. R. Jaen (2010) | 18.13 | USA            | Annals of family medicine                  | Non-empirical      | Primary care                            |
| Miller, W. L., B. F. Crabtree, R. McDaniel and K. C. Stange (1998)               | 14.35 | USA            | Journal of family practice                 | Non-empirical      | Primary care                            |
| Miller, W. L., R. R. McDaniel, B. F. Crabtree and K. C. Stange (2001)            | 14.82 | USA            | Journal of family practice                 | Empirical          | Primary care                            |
| Minas, H. (2005)                                                                 | 3.54  | Australia      | Australian psychiatry                      | Non-empirical      | Leadership- for change in mental health |

|                                                                                                                                                                           |       |                 |                                               |                    |                                                   |
|---------------------------------------------------------------------------------------------------------------------------------------------------------------------------|-------|-----------------|-----------------------------------------------|--------------------|---------------------------------------------------|
| Mitchell, D. (2014)                                                                                                                                                       | 0.50  | United Kingdom  | Journal of evaluation in clinical practice    | Non-empirical      | Patient perspectives                              |
| Mitchell, G. J., N. Cross, M. Wilson, S. Biernacki, W. N. Wong, B. Adib and D. Rush (2013)                                                                                | 2.00  | Canada          | Nursing research and practice                 | Non-empirical      | Chronic illness management - nursing health coach |
| Mitleton-Kelly, E. (2011)                                                                                                                                                 | 7.86  | United Kingdom  | The learning organization                     | Empirical          | Health system sustainability                      |
| Mohr, J. J., P. Batalden and P. Barach (2004)                                                                                                                             | 10.36 | USA             | Quality and safety in health care             | Non-empirical      | Health care organisations generally               |
| Monrouxe, L. V., C. E. Rees and W. Hu (2011)                                                                                                                              | 18.43 | United Kingdom  | Medical education                             | Empirical          | Education – medicine                              |
| Moretti-Pires, R. O. (2009)                                                                                                                                               | 10.89 | Brazil          | Interface - comunicação, saúde, educação      | Empirical          | Primary care                                      |
| Morton, A. and J. Cornwell (2009)                                                                                                                                         | 3.33  | United Kingdom  | Bmj                                           | Non-empirical      | Hospital - process improvement                    |
| Mowles, C., A. van der Gaag and J. Fox (2010)                                                                                                                             | 4.00  | United Kingdom  | Journal of health organization and management | Non-empirical      | Health care systems - change                      |
| Mulready-Shick, J. and K. Flanagan (2014)                                                                                                                                 | 5.00  | USA             | Nursing education perspective                 | Empirical          | Education                                         |
| Munday, D. F., S. A. Johnson and F. E. Griffiths (2003)                                                                                                                   | 1.67  | United Kingdom  | Palliative medicine                           | Non-empirical      | Palliative care                                   |
| Murai, M., K. Kitamura and M. D. Fetters (2005)                                                                                                                           | 2.46  | USA             | Bmc medical education                         | Empirical          | Primary care – education                          |
| Murray, P. J. (1992)                                                                                                                                                      | 0.12  | United Kingdom  | Intensive and critical care nursing           | Non-empirical      | Nursing - critical care - education               |
| Nardi, R., G. Scanelli, S. Corrao, I. Iori, G. Mathieu and R. C. Amatrian (2007)                                                                                          | 10.00 | Italy           | European journal of internal medicine         | Non-empirical      | Internal medicine                                 |
| Nardi, R., T. Fabbri, G. Belmonte, P. Leandri, M. Mazzetti, A. Pasquale, M. Reta, C. Rizzi, G. Scanelli, I. Iori, G. Gussoni, C. Pedace, G. Mathieu and A. Mazzone (2009) | 1.20  | Italy           | Italian journal of medicine                   | Unable to classify | Internal medicine - evidence based medicine       |
| Nieuwenhuijze, M., S. Downe, H. Gottfreosdottir, M. Rijnders, A. du Preez and P. V. Rebelo (2015)                                                                         | 1.33  | The Netherlands | Midwifery                                     | Review             | Hospital – midwifery                              |



|                                                                                                                  |       |                |                                                |               |                                                             |
|------------------------------------------------------------------------------------------------------------------|-------|----------------|------------------------------------------------|---------------|-------------------------------------------------------------|
| Noel, P. H., H. J. Lanham, R. F. Palmer, L. K. Leykum and M. L. Parchman (2013)                                  | 11.00 | USA            | Health care management review                  | Empirical     | Primary care - chronic care-teamwork – learning             |
| Noll, D. C. (1996).                                                                                              | 0     | USA            | Medical group management journal               | Non-empirical | Management/leadership                                       |
| Noll, D. C. (1997)                                                                                               | 0.19  | USA            | Medical group management journal               | Non-empirical | Healthcare systems generally                                |
| Norman, C. D. (2009)                                                                                             | 7.67  | Canada         | Journal of evaluation in clinical practice     | Non-empirical | Health promotion                                            |
| Norman, C. D. (2013)                                                                                             | 1.60  | Canada         | Journal of evaluation in clinical practice     | Non-empirical | Education                                                   |
| Norman, C. D., J. Charnaw-Burger, A. L. Yip, S. Saad and C. Lombardo (2010)                                      | 2.88  | Canada         | Journal of evaluation in clinical practice     | Non-empirical | Learning - networks, knowledge generation                   |
| Norman, G. (2011)                                                                                                | 3.71  | Canada         | Medical education                              | Non-empirical | Medicine – education                                        |
| Notarnicola, I., C. Petrucci, M. R. De Jesus Barbosa, F. Giorgi, A. Stievano, G. Rocco and L. Lancia (2017)      | 2.00  | Italy          | International journal of nursing practice      | Review        | Nursing                                                     |
| Olive, P. (2017)                                                                                                 | 1.00  | United Kingdom | Journal of clinical nursing                    | Empirical     | Hospital - ED following intimate partner violence           |
| Olive, P. (2017)a                                                                                                | 0.50  | United Kingdom | Journal of clinical nursing                    | Empirical     | Hospital - emergency department - intimate partner violence |
| Orlowski, S., S. Lawn, M. Ben, A. Venning, G. Jones, M. Winsall, G. Antezana, N. Bidargaddi and P. Musiat (2017) | 0.50  | Australia      | International journal of mental health nursing | Empirical     | Mental health services                                      |
| Orr, M., M. Orr and S. Sankaran (2007)                                                                           | 2.00  | New Zealand    | Emergence-complexity & organization            | Empirical     | IT system implementation                                    |
| O'Sullivan, T. L., C. E. Kuziemy, D. Toal-Sullivan and W. Cornell (2013)                                         | 22.60 | Canada         | Social science & medicine                      | Empirical     | Public health - health promotion in disaster                |
| Otten, R. and T. Chen (2011)                                                                                     | 1.29  | USA            | Creative nursing                               | Non-empirical | Leadership - nursing - working relationships                |
| Oyeleye, O., P. Hanson, N. O'Connor and D. Dunn (2013)                                                           | 16.80 | USA            | Journal of nursing administration              | Empirical     | Nursing - workplace bullying                                |
| Paley, J. (2007)                                                                                                 | 8.45  | United Kingdom | Nursing inquiry                                | Non-empirical | Nursing - cardiac rehabilitation                            |



|                                                                                                                                     |        |                |                                                          |               |                                                     |
|-------------------------------------------------------------------------------------------------------------------------------------|--------|----------------|----------------------------------------------------------|---------------|-----------------------------------------------------|
| Paley, J. (2010)                                                                                                                    | 7.13   | United Kingdom | Journal of health services research and policy           | Non-empirical | Healthcare research discipline                      |
| Paley, J. and G. Eva (2011)                                                                                                         | 7.71   | United Kingdom | International journal of nursing studies                 | Non-empirical | Research - academic conceptualisation of healthcare |
| Papadopoulos, M. C., M. Hadjitheodossiou, C. Chrysostomou, C. Hardwidge and B. A. Bell (2001)                                       | 1.65   | United Kingdom | Journal of the royal society of medicine                 | Empirical     | Health care system whole - wait lists for surgery   |
| Parchman, M. L., J. A. Pugh, S. D. Culler, P. H. Noel, N. H. Arar, R. L. Romero and R. F. Palmer (2008)                             | 2.50   | USA            | Implementation science                                   | Non-empirical | Primary care – diabetes                             |
| Patel, A. M., T. M. Sundt 3rd and P. Varkey (2008)                                                                                  | 0.70   | USA            | Minnesota medicine                                       | Non-empirical | Medical practice                                    |
| Patel, V. L., J. Zhang, N. A. Yoskowitz, R. Green and O. R. Sayan (2008)                                                            | 12.70  | USA            | Journal of biomedical informatics                        | Non-empirical | Hospital – decision making - ICU                    |
| Patterson, M. and E. S. Deutsch (2015)                                                                                              | 5.00   | USA            | Current problems in pediatric and adolescent health care | Non-empirical | Safety                                              |
| Pauly, B., M. MacDonald, T. Hancock, W. Martin and K. Perkin (2013)                                                                 | 3.40   | Canada         | Bmc public health                                        | Non-empirical | Public health services                              |
| Peirce, J. C. (2000)                                                                                                                | 0.06   | USA            | Health care management review                            | Non-empirical | Health care organisations                           |
| Pelletier, D., S. Gervais, H. Hafeez-Ur-Rehman, D. Sanou and J. Tumwine (2018)                                                      | 0      | USA            | International journal of health planning and management  | Empirical     | Policy                                              |
| Penney, L. S., L. K. Leykum, P. Noel, E. P. Finley, H. J. Lanham and J. Pugh (2018)                                                 | 0      | USA            | Bmj open                                                 | Non-empirical | Hospital - readmission rates                        |
| Penprase, B. and D. Norris (2005)                                                                                                   | 2.92   | USA            | Nursing leadership forum                                 | Non-empirical | Leadership                                          |
| Perez, B. and A. Liberman (2011)                                                                                                    | 0.14   | USA            | The health care manager                                  | Non-empirical | Decision making                                     |
| Pitkaaho, T., P. Partanen, M. Miettinen and K. Vehvilainen-Julkunen (2015)                                                          | 4.25   | Finland        | Journal of advanced nursing                              | Empirical     | Hospital                                            |
| Piven, M. L., N. Ammarell, D. Bailey, K. Corazzini, C. S. Colon-Emeric, D. Lekan-Rutledge, Q. Utley-Smith and R. A. Anderson (2006) | 2.92   | USA            | Western journal of nursing research                      | Empirical     | Nursing home                                        |
| Plsek, P. E. and T. Greenhalgh (2001)                                                                                               | 110.06 | USA            | Bmj                                                      | Non-empirical | Healthcare – general                                |

|                                                                                                                          |       |                |                                                            |               |                                                              |
|--------------------------------------------------------------------------------------------------------------------------|-------|----------------|------------------------------------------------------------|---------------|--------------------------------------------------------------|
| Plsek, P. E. and T. Wilson (2001)                                                                                        | 41.41 | USA            | Bmj                                                        | Non-empirical | Leadership                                                   |
| Pradebon, V. M., A. L. Erdmann, J. L. Leite, S. B. S. de Lima and A. G. Prochnow (2011)                                  | 0.71  | Brazil         | Acta paulista de enfermagem                                | Empirical     | Hospital - paediatric ICU                                    |
| Priesmeyer, H. R. and L. F. Sharp (1995)                                                                                 | 0.61  | USA            | Quality management in health care                          | Non-empirical | Leadership - management administration                       |
| Priesmeyer, H. R., L. F. Sharp, L. Wammack and J. D. Mabrey (1996)                                                       | 0.64  | USA            | Quality management in health care                          | Non-empirical | Clinical pathways and care continuity                        |
| Provost, S. M., H. J. Lanham, L. K. Leykum, R. R. McDaniel and J. Pugh (2015)                                            | 14.00 | USA            | Health care management review                              | Empirical     | Collaboration and teamwork – safety                          |
| Puga, F., K. R. Stevens and D. I. Patel (2013)                                                                           | 1.20  | USA            | Nursing research and practice                              | Empirical     | Hospital - collaborative, transdisciplinary research network |
| Pype, P., D. Krystallidou, M. Deveugele, F. Mertens, S. Rubinelli and I. Devisch (2017)                                  | 2.00  | Belgium        | Patient education and counseling                           | Empirical     | Collaboration and teamwork                                   |
| Quinn, G. R., E. Le, K. Soni, G. Berger, Y. E. Mak and R. Pierce (2014)                                                  | 1.75  | USA            | The joint commission journal on quality and patient safety | Empirical     | Hospital - emergency department                              |
| Ramaswamy, R., J. Reed, N. Livesley, V. Boguslavsky, E. G. Ellorio, S. Sax, D. Houleymata, L. Kimble and G. Parry (2018) | 0     | USA            | International journal for quality in health care           | Non-empirical | Quality improvement                                          |
| Rangachari, P. (2008)                                                                                                    | 1.20  | USA            | Quality management in health care                          | Empirical     | Hospital - quality indicators                                |
| Rantz, M. J., M. K. Flesner and M. Zwygart-Stauffacher (2010)                                                            | 1.75  | USA            | Journal of nursing care quality                            | Non-empirical | Nursing home - quality indicators                            |
| Rantz, M. J., M. Zwygart-Stauffacher, M. Flesner, L. Hicks, D. Mehr, T. Russell and D. Minner (2013)                     | 4.40  | USA            | Journal of the american medical directors association      | Empirical     | Nursing home                                                 |
| Redfern, S. and S. Christian (2003)                                                                                      | 8.67  | United Kingdom | Journal of evaluation in clinical practice                 | Empirical     | Community and inpatient                                      |
| Reid, J., K. Stone, L. Huang and E. S. Deutsch (2016)                                                                    | 1.00  | USA            | Clinical pediatric emergency medicine                      | Non-empirical | Hospital - safety - paediatric medicine                      |
| Restau, J. and P. Green (2014)                                                                                           | 0     | USA            | Critical care nursing clinics of north america             | Non-empirical | Hospital - ICU - palliative care                             |
| Reynolds, M., E. Sarriot, R. C. Swanson and E. Rusoja (2018)                                                             | 1.00  | United Kingdom | Journal of evaluation in clinical practice                 | Non-empirical | Health care generally                                        |

|                                                                                                                          |       |                 |                                                           |                    |                                             |
|--------------------------------------------------------------------------------------------------------------------------|-------|-----------------|-----------------------------------------------------------|--------------------|---------------------------------------------|
| Rhodes, M. G. (2013)                                                                                                     | 1.40  | The Netherlands | International journal of health policy management         | Non-empirical      | Health systems                              |
| Rhydderch, M., G. Elwyn, M. Marshall and R. Grol (2004)                                                                  | 6.57  | United Kingdom  | Quality and safety in health care                         | Non-empirical      | Primary care – indicators                   |
| Ribesse, N., P. Bossyns, B. Marchal, H. Karemere, C. J. Burman and J. Macq (2017)                                        | 1.67  | Belgium         | Global health promotion                                   | Non-empirical      | Health systems reform                       |
| Rice, W. P. (1996)                                                                                                       | 0.09  | USA             | Journal of clinical engineering                           | Unable to classify | Health care generally                       |
| Rickles, D., P. Hawe and A. Shiell (2007)                                                                                | 19.55 | Canada          | Journal of epidemiology and community health              | Non-empirical      | Health care generally                       |
| Righi, A. W., P. Wachs and T. A. Saurin (2012)                                                                           | 1.50  | Brazil          | Work                                                      | Empirical          | Emergency medicine - ambulance              |
| Rogers, H., L. Maher and P. E. Plsek (2008)                                                                              | 1.50  | United Kingdom  | Bmj                                                       | Non-empirical      | Health care system                          |
| Rojas-Mendizabal, V., A. Serrano-Santoyo, R. Conte-Galvan, S. Villarreal-Reyes and R. Rivera-Rodriguez (2017)            | 0     | Mexico          | Ingeniería e investigación                                | Non-empirical      | Technology e-health – implementation        |
| Rojas-Mendizabal, V., A. Serrano-Santoyo, R. Conte-Galvan, S. Villarreal-Reyes and R. Rivera-Rodriguez (2017)a           | 0     | Mexico          | Ingeniería e investigación                                | Non-empirical      | E-Health – technology                       |
| Royeen, C. B. and A. J. Luebben (2002)                                                                                   | 0.56  | USA             | Occupational therapy in health care                       | Non-empirical      | Allied health - occupational therapy        |
| Rusoja, E., D. Haynie, J. Sievers, N. Mustafee, F. Nelson, M. Reynolds, E. Sarriot, R. C. Swanson and B. Williams (2018) | 1.00  | USA             | Journal of evaluation in clinical practice                | Review             | Research - complexity science in healthcare |
| Santos, F. A. P. S. d., B. C. Enders, V. E. P. Santos, D. N. A. Dantas and L. S. M. V. d. Miranda (2016)                 | 0     | Brazil          | Escola anna nery                                          | Non-empirical      | Health system - obstetric care              |
| Sargeant, J. (2009)                                                                                                      | 16.56 | Canada          | Journal of continuing education in the health professions | Non-empirical      | Education - interprofessional education     |
| Sarriot, E. and M. Kouletio (2015)                                                                                       | 6.33  | USA             | Systemic practice and action research                     | Non-empirical      | Health system - sustainability              |

|                                                                                                                |      |                |                                        |                    |                                               |
|----------------------------------------------------------------------------------------------------------------|------|----------------|----------------------------------------|--------------------|-----------------------------------------------|
| Schneider, H., R. English, H. Tabana, T. Padayachee and M. Orgill (2014)                                       | 3.50 | South Africa   | Bmc health services research           | Empirical          | Health system - primary care - implementation |
| Schoo, A. and K. Kumar (2018)                                                                                  | 0    | Australia      | The clinical teacher                   | Non-empirical      | Education                                     |
| Schulz, V. M., A. M. Crombeen, D. Marshall, J. Shadd, K. A. LaDonna and L. Lingard (2017)                      | 1.00 | Canada         | Journal of pain and symptom management | Empirical          | Heart failure                                 |
| Scott, K. and A. Steinbinder (2009)                                                                            | 0.22 | USA            | Nursing administration quarterly       | Unable to classify | Change and improvement                        |
| Scott, K. and J. Van Norman (2009)                                                                             | 1.11 | USA            | Nursing administration quarterly       | Unable to classify | EHR implementation                            |
| Sharp, L. F. and H. R. Priesmeyer (1995)                                                                       | 1.43 | USA            | Quality management in health care      | Non-empirical      | Health care organisations - generally         |
| Shen, W., L. Jiang, M. Zhang, Y. Ma, G. Jiang and X. He (2014)                                                 | 0.75 | China          | Chinese medical journal                | Non-empirical      | Research - mass casualty incidents            |
| Shirey, M. R., P. R. Ebright and A. M. McDaniel (2013)                                                         | 7.60 | USA            | Journal of nursing management          | Empirical          | Leadership - nursing - decision making        |
| Silva, I. R., A. M. T. Gomes, G. V. Valadares, N. L. P. dos Santos, T. P. da Silva and J. L. Leite (2015)      | 1.33 | Brazil         | Revista gaucha de enfermagem           | Empirical          | Nursing - knowledge of aids/std               |
| Silva, Í. R., J. L. Leite, M. A. Trevizan, I. A. C. Mendes, T. P. d. Silva and S. M. d. S. B. Lins (2017)      | 0    | Brazil         | Escola anna nery                       | Empirical          | Education - nursing                           |
| Silva, O., E. D. Alves and M. C. S. Rodrigues (2014)                                                           | 0.50 | Brazil         | Cultura de los cuidados                | Empirical          | Nursing - education                           |
| Simmons, M. (2003)                                                                                             | 0.80 | United Kingdom | Journal of hospital infection          | Non-empirical      | Management of communicable diseases           |
| Simpson, K. M., K. Porter, E. S. McConnell, C. Colón-Emeric, K. A. Daily, A. Stalzer and R. A. Anderson (2013) | 6.80 | USA            | Implementation science                 | Non-empirical      | Implementation/improvement                    |
| Sims, T. (2014)                                                                                                | 0    | USA            | Creative nursing                       | Unable to classify | Pregnancy                                     |
| Singh, R., J. Hickner, J. Mold and G. Singh (2014)                                                             | 1.75 | USA            | Journal of patient safety              | Empirical          | Primary health care - testing processes       |
| Singh, R., T. Servoss, M. Kalsman, C. Fox and G. Singh (2004)                                                  | 3.64 | USA            | Informatics in primary care            | Empirical          | Primary care                                  |

|                                                                                                                      |       |                 |                                                            |               |                                                     |
|----------------------------------------------------------------------------------------------------------------------|-------|-----------------|------------------------------------------------------------|---------------|-----------------------------------------------------|
| Smit, E. H. and J. J. L. Derksen (2015)                                                                              | 0.33  | The Netherlands | Nonlinear dynamics, psychology, and life sciences          | Non-empirical | Primary care - psychologists                        |
| Smit, E. H. D. and J. J. L. J. Derksen (2017)                                                                        | 0     | The Netherlands | Europe's journal of psychology                             | Empirical     | Primary care - psychology                           |
| Smith, C. S., C. Francovich, M. Morris, W. Hill, F. Langlois-Winkle, R. Rupper, C. Roth, S. Wheeler and A. Vo (2010) | 1.13  | USA             | Advances in health sciences education                      | Non-empirical | Education                                           |
| Smith, H., C. Kuziemyky and C. Champion (2018)                                                                       | 0     | Canada          | Canadian journal of surgery                                | Non-empirical | Hospital - surgery - physician extender             |
| Smits, S. J., J. A. Falconer, R. Morland and D. C. Strasser (1997)                                                   | 0.24  | USA             | Topics in stroke rehabilitation                            | Non-empirical | Rehabilitation - stroke                             |
| Snoeren, M. M. W. C., B. M. Janssen, T. J. H. Niessen and T. A. Abma (2016)                                          | 6.50  | The Netherlands | Health care analysis                                       | Empirical     | Nursing home - patient centredness - culture change |
| Soliman, M. and T. A. Saurin (2017)                                                                                  | 4.00  | Brazil          | Journal of manufacturing systems                           | Review        | Lean management                                     |
| Soubhi, H., E. A. Bayliss, M. Fortin, C. Hudon, M. van den Akker, R. Thivierge, N. Posel and D. Fleiszer (2010)      | 11.75 | Canada          | Annals of family medicine                                  | Non-empirical | Primary care                                        |
| Squires, A., S. J. Uyei, H. Beltran-Sanchez and S. A. Jones (2016)                                                   | 2.00  | USA             | Human resources for health                                 | Empirical     | Health care workforce - health systems              |
| Ssengooba, F., B. McPake and N. Palmer (2012)                                                                        | 15.50 | Uganda          | Social science & medicine                                  | Empirical     | Performance targets - health systems                |
| Stange, K. C. (2009)                                                                                                 | 7.78  | USA             | Annals of family medicine                                  | Non-empirical | Primary care - reform                               |
| Stange, K. C. (2011)                                                                                                 | 1.86  | USA             | American journal of preventive medicine                    | Non-empirical | Preventive health                                   |
| Sterns, S., S. C. Miller and S. Allen (2010)                                                                         | 6.50  | USA             | Journal of the american medical directors association      | Empirical     | Nursing home - culture change                       |
| Strand, R., G. Rortveit and E. Schei (2004)                                                                          | 1.43  | Norway          | Complexus                                                  | Non-empirical | Medical practice                                    |
| Stroebel, C. K., R. R. McDaniel Jr, B. F. Crabtree, W. L. Miller, P. A. Nutting and K. C. Stange (2005)              | 15.69 | USA             | The joint commission journal on quality and patient safety | Non-empirical | Primary care - quality improvement                  |
| Sturmberg, J. P. (2007)                                                                                              | 3.27  | Australia       | Australian family physician                                | Non-empirical | Clinical generally                                  |
| Sturmberg, J. P. (2007)                                                                                              | 1.09  | Australia       | Australian family physician                                | Non-empirical | Primary care - research                             |

|    |                                                                                                                                                        |       |                |                                               |               |                                                        |
|----|--------------------------------------------------------------------------------------------------------------------------------------------------------|-------|----------------|-----------------------------------------------|---------------|--------------------------------------------------------|
| 1  | Sturmberg, J. P. and P. Cilliers (2009)                                                                                                                | 3.89  | Australia      | Journal of evaluation in clinical practice    | Non-empirical | Health care systems and practice generally             |
| 2  | 3                                                                                                                                                      |       |                |                                               |               |                                                        |
| 4  | Sturmberg, J. P., C. M. Martin and D. A. Katerndahl (2014)                                                                                             | 20.25 | Australia      | Annals of family medicine                     | Review        | Primary care                                           |
| 5  | 6                                                                                                                                                      |       |                |                                               |               |                                                        |
| 6  | 7                                                                                                                                                      |       |                |                                               |               |                                                        |
| 7  | Sweeney, K. G. and R. Mannion (2002)                                                                                                                   | 1.63  | United Kingdom | British journal of general practice           | Non-empirical | Clinical governance                                    |
| 8  | 9                                                                                                                                                      |       |                |                                               |               |                                                        |
| 9  | Tait, G. L. R., J. Bates, K. A. LaDonna, V. N. Schulz, P. H. Strachan, A. McDougall and L. Lingard (2015)                                              | 5.33  | Canada         | Journal of multidisciplinary healthcare       | Empirical     | Heart failure                                          |
| 10 | 11                                                                                                                                                     |       |                |                                               |               |                                                        |
| 11 | 12                                                                                                                                                     |       |                |                                               |               |                                                        |
| 12 | Tan, J., H. J. Wen and N. Awad (2005). "Health care and services delivery systems as complex adaptive systems." Communications of the Acm 48(5): 36-44 | 11.23 | USA            | Communications of the acm                     | Non-empirical | Health care generally - service delivery system        |
| 13 | 14                                                                                                                                                     |       |                |                                               |               |                                                        |
| 14 | 15                                                                                                                                                     |       |                |                                               |               |                                                        |
| 15 | 16                                                                                                                                                     |       |                |                                               |               |                                                        |
| 16 | 17                                                                                                                                                     |       |                |                                               |               |                                                        |
| 17 | Tang, W. X., L. Wei and L. Zhang (2017)                                                                                                                | 0     | China          | International journal of integrated care      | Empirical     | Health system - health care reform for integrated care |
| 18 | 19                                                                                                                                                     |       |                |                                               |               |                                                        |
| 19 | 20                                                                                                                                                     |       |                |                                               |               |                                                        |
| 20 | Taylor, E., A. J. Card and M. Piatkowski (2018)                                                                                                        | 0     | USA            | Health environments research & design journal | Review        | Hospital - patient room                                |
| 21 | 22                                                                                                                                                     |       |                |                                               |               |                                                        |
| 22 | 23                                                                                                                                                     |       |                |                                               |               |                                                        |
| 23 | 24                                                                                                                                                     |       |                |                                               |               |                                                        |
| 24 | 25                                                                                                                                                     |       |                |                                               |               |                                                        |
| 25 | 26                                                                                                                                                     |       |                |                                               |               |                                                        |
| 26 | 27                                                                                                                                                     |       |                |                                               |               |                                                        |
| 27 | 28                                                                                                                                                     |       |                |                                               |               |                                                        |
| 28 | 29                                                                                                                                                     |       |                |                                               |               |                                                        |
| 29 | 30                                                                                                                                                     |       |                |                                               |               |                                                        |
| 30 | 31                                                                                                                                                     |       |                |                                               |               |                                                        |
| 31 | 32                                                                                                                                                     |       |                |                                               |               |                                                        |
| 32 | 33                                                                                                                                                     |       |                |                                               |               |                                                        |
| 33 | 34                                                                                                                                                     |       |                |                                               |               |                                                        |
| 34 | 35                                                                                                                                                     |       |                |                                               |               |                                                        |
| 35 | 36                                                                                                                                                     |       |                |                                               |               |                                                        |
| 36 | 37                                                                                                                                                     |       |                |                                               |               |                                                        |
| 37 | 38                                                                                                                                                     |       |                |                                               |               |                                                        |
| 38 | 39                                                                                                                                                     |       |                |                                               |               |                                                        |
| 39 | 40                                                                                                                                                     |       |                |                                               |               |                                                        |
| 40 | 41                                                                                                                                                     |       |                |                                               |               |                                                        |
| 41 | 42                                                                                                                                                     |       |                |                                               |               |                                                        |
| 42 | 43                                                                                                                                                     |       |                |                                               |               |                                                        |
| 43 | 44                                                                                                                                                     |       |                |                                               |               |                                                        |
| 44 | 45                                                                                                                                                     |       |                |                                               |               |                                                        |
| 45 | 46                                                                                                                                                     |       |                |                                               |               |                                                        |
| 46 |                                                                                                                                                        |       |                |                                               |               |                                                        |



|                                                                                        |      |                 |                                                 |               |                                       |
|----------------------------------------------------------------------------------------|------|-----------------|-------------------------------------------------|---------------|---------------------------------------|
| Valencia A, M. (2011)                                                                  | 2.14 | Colombia        | Revista facultad nacional de salud pública      | Non-empirical | Public health                         |
| Valeras, A., Gunn, W., and A. Valeras (2013)                                           | 0.40 | USA             | International journal of psychiatry in medicine | Non-empirical | Education                             |
| Vallis, M. (2015)                                                                      | 4.33 | Canada          | Canadian journal of diabetes                    | Non-empirical | Diabetes management                   |
| Van Beurden, E. K., A. M. Kia, A. Zask, U. Dietrich and L. Rose (2013)                 | 7.71 | Australia       | Health promotion international                  | Non-empirical | Health promotion                      |
| van de Wetering, R. and R. Batenburg (2014)                                            | 5.50 | The Netherlands | Journal of digital imaging                      | Empirical     | Hospital - IT                         |
| van der Vlegel-Brouwer, W. (2013)                                                      | 2.20 | The Netherlands | International journal of integrated care        | Non-empirical | Integrated care - policy-practice gap |
| van Rossum, T. R., F. Scheele, A. Scherpbier, H. E. Sluiter and I. C. Heyligers (2016) | 1.50 | The Netherlands | Bmc medical education                           | Non-empirical | Education - medicine                  |
| van Wietmarschen, H. A., H. M. Wortelboer and J. van der Greef (2018)                  | 4.00 | The Netherlands | Journal of evaluation in clinical practice      | Non-empirical | Health care generally                 |
| Varghese, J., V. R. Kutty, L. Paina and T. Adam (2014)                                 | 4.75 | India           | Health research policy and systems              | Empirical     | Public health - vaccination coverage  |
| Velde, B. P., A. G. Greer, D. C. Lynch and S. Escott-Stump (2002)                      | 0.69 | USA             | Journal of allied health                        | Non-empirical | Education                             |
| Velez Lapao, L. (2007)                                                                 | 3.09 | Portugal        | Methods of information in medicine              | Empirical     | Information/IT systems                |
| Vicenzi, A. E. (1994)                                                                  | 1.08 | USA             | Nursing science quarterly                       | Non-empirical | Nursing                               |
| Vieira, M., P. Klock, R. Costa and A. L. Erdmann (2009)                                | 0.33 | Colombia        | Aquichan                                        | Non-empirical | Nursing profession                    |
| Vogt, E. M. (2002)                                                                     | 0.94 | USA             | Drug safety                                     | Non-empirical | Medication safety                     |
| Vosman, F. and A. Niemeijer (2017)                                                     | 4.00 | The Netherlands | Medicine, health care and philosophy            | Non-empirical | Hospital - health care                |



|                                                                       |       |                 |                                                    |               |                                                                   |
|-----------------------------------------------------------------------|-------|-----------------|----------------------------------------------------|---------------|-------------------------------------------------------------------|
| Walls, M. E. and R. R. McDaniel, Jr. (1999)                           | 0.53  | USA             | Seminars for nurse managers                        | Non-empirical | Mergers - leadership - organisational change, nurse management    |
| Walton, M. (2016)                                                     | 2.50  | New Zealand     | Evidence and policy                                | Non-empirical | Public health - governance/policy                                 |
| Wang, L., X. Zhang, X. Liang and G. Bloom (2016)                      | 2.00  | China           | Globalization and health                           | Empirical     | Health care policy - global health system - antibiotic resistance |
| West, G. B. (2012)                                                    | 8.00  | United Kingdom  | The lancet                                         | Non-empirical | Medicine                                                          |
| West, G. B. (2012)a                                                   | 8.00  | USA             | The lancet                                         | Non-empirical | Medicine                                                          |
| Wilkinson, J., M. Goff, E. Rusoja, C. Hanson and R. C. Swanson (2017) | 1.00  | USA             | Journal of evaluation in clinical practice         | Review        | Health systems, generally                                         |
| Wilson, J. (2014)                                                     | 1.75  | United Kingdom  | Monash bioethics review                            | Non-empirical | Translation - evidence into practice - bioethics                  |
| Wilson, N. J. and M. J. Hatlie (2001)                                 | 0.59  | USA             | Journal of healthcare quality                      | Non-empirical | Patient safety                                                    |
| Wilson, T., T. Holt and T. Greenhalgh (2001)                          | 28.06 | United Kingdom  | Bmj                                                | Non-empirical | Clinical - general                                                |
| Wouters, E. F. M. and I. M. L. Vanderhoven (2009)                     | 0.56  | The Netherlands | Seminars in respiratory and critical care medicine | Non-empirical | Integrated care - chronic disease                                 |
| Zarowsky, C., S. Haddad and V.-K. Nguyen (2013)                       | 3.60  | South Africa    | Global health promotion                            | Non-empirical | Vulnerable groups in healthcare                                   |

1  
2  
3  
4  
5  
6  
7  
8  
9  
10  
11  
12  
13  
14  
15  
16  
17  
18  
19  
20  
21  
22  
23  
24  
25  
26  
27  
28  
29  
30  
31  
32  
33  
34  
35  
36  
37  
38  
39  
40  
41  
42  
43  
44  
45  
46

|                                                             |      |        |                                  |                    |                          |
|-------------------------------------------------------------|------|--------|----------------------------------|--------------------|--------------------------|
| Zhao, J., H. Yang, H. Guo, Y. Li, Z. Zhang and S. Li (2010) | 0    | China  | Shengwu yixue gongchengxue zazhi | Unable to classify | Hospital                 |
| Zimmerman, B. (1999)                                        | 3.21 | Canada | Healthcare forum journal         | Non-empirical      | Uncertainty - leadership |

For peer review only
