# Supplementary material for: The influence of complexity: a bibliometric analysis of complexity science in healthcare
Source: PubMed Central journal article supplement — BMJ Open. 2019 Mar 23;9(3):e027308. doi: 10.1136/bmjopen-2018-027308 (PMC6475366; doi:10.1136/bmjopen-2018-027308), 2019-03-23
Supplement: bmjopen-2018-027308supp001.pdf [file bmjopen-2018-027308supp001.pdf]

## Appendix 1.

Database: Web of Science All Databases

Includes Web of Science Core Collection, BIOSIS Citation Index, Current Contents Connect, Inspec<sup>®</sup>, KCI-Korean Journal Database, MEDLINE<sup>®</sup>, Russian Science Citation Index, SciELO Citation Index, Zoological Record

1864-Present

Search using TS=topic search (Title, Abstract, Author Keywords, Keywords Plus<sup>®</sup>)

---

1. TS=(healthcare OR “health care” OR “health-care” OR hospital OR “health facilit\*” OR “acute care” OR “health organi\*” OR “health system” OR “primary care” OR “general practice” OR “aged care” OR “nurs\* home” OR medic\* OR clinic\* OR nurs\* OR health)
2. TS=(“Complexity theory” OR “complexity science” OR “complex adaptive system” OR “complexity thinking” OR “complex responsive process theory” OR “chaos theory”)
3. 1 and 2
