# Supplementary material for: The influence of complexity: a bibliometric analysis of complexity science in healthcare
Source: PubMed Central journal article supplement — BMJ Open. 2019 Mar 23;9(3):e027308. doi: 10.1136/bmjopen-2018-027308 (PMC6475366; doi:10.1136/bmjopen-2018-027308), 2019-03-23
Supplement: bmjopen-2018-027308supp002.pdf [file bmjopen-2018-027308supp002.pdf]

## Appendix 2.

| Source                                                                                                        | Average citations per year | Country of corresponding author | Journal                                                                        | Empirical     | Healthcare context                                                      |
|---------------------------------------------------------------------------------------------------------------|----------------------------|---------------------------------|--------------------------------------------------------------------------------|---------------|-------------------------------------------------------------------------|
| Abbott, P. A., J. Foster, H. d. F. Marin and P. C. Dykes (2014)                                               | 10.75                      | USA                             | International journal of medical informatics                                   | Empirical     | IT implementation                                                       |
| Afek, A., A. Meilik and Z. Rotstein (2009)                                                                    | 0.22                       | Israel                          | Harefuah                                                                       | Non-empirical | Management                                                              |
| Agyepong, I. A., A. Kodua, S. Adjei and T. Adam (2012)                                                        | 8.83                       | Ghana                           | Health policy and planning                                                     | Empirical     | Health system - policy                                                  |
| Aherne, M. and J. Pereira (2005)                                                                              | 1.17                       | Canada                          | Leadership in health services                                                  | Non-empirical | Health care policy - palliative care                                    |
| Aita, V., H. McIlvain, E. Backer, K. McVea and B. Crabtree (2005)                                             | 5.92                       | USA                             | Patient education and counseling                                               | Empirical     | Primary care - patient-practitioner communication                       |
| Albanese, M., G. Mejjicano, G. Xakellis and P. Kokotailo (2009)                                               | 2.11                       | USA                             | Academic medicine                                                              | Non-empirical | Health care systems                                                     |
| Allred, C. A., B. J. Burns and S. D. Phillips (2005)                                                          | 1.69                       | USA                             | Administration and policy in mental health and mental health services research | Non-empirical | Community mental health care - assertive community treatment            |
| Anderson, C. A. and A. L. Whall (2011)                                                                        | 0.71                       | USA                             | Journal of advanced nursing                                                    | Non-empirical | Nursing - research - agent based modelling                              |
| Anderson, R. A. and R. R. McDaniel (1999)                                                                     | 5.68                       | USA                             | Health care management review                                                  | Empirical     | Nursing home - nursing - decision making                                |
| Anderson, R. A. and R. R. McDaniel Jr (2000)                                                                  | 18.33                      | USA                             | Health care management review                                                  | Non-empirical | Leadership and professionalism                                          |
| Anderson, R. A., B. E. Crabtree, D. J. Steele and R. R. McDaniel (2005)                                       | 25.08                      | USA                             | Qualitative health research                                                    | Non-empirical | Health care organisations                                               |
| Anderson, R. A., C. A. Allred and F. A. Sloan (2003)                                                          | 1.47                       | USA                             | Health care management review                                                  | Empirical     | Hospital - management practice changes in light of ownership conversion |
| Anderson, R. A., D. E. Bailey, B. Wu, K. Corazzini, E. S. McConnell, N. M. Thygeson and S. L. Docherty (2015) | 5.67                       | USA                             | Advances in nursing science                                                    | Non-empirical | Leadership – chronic illness                                            |
| Anderson, R. A., K. Corazzini, K. Porter, K. Daily, R. R. McDaniel and C. Colon-Emeric (2012)                 | 7.33                       | USA                             | Implementation science                                                         | Non-empirical | Nursing homes                                                           |

|                                                                                                                                       |       |                |                                            |               |                                             |
|---------------------------------------------------------------------------------------------------------------------------------------|-------|----------------|--------------------------------------------|---------------|---------------------------------------------|
| Anderson, R. A., K. N. Corazzini and R. R. McDaniel Jr (2004)                                                                         | 15.93 | USA            | The gerontologist                          | Empirical     | Nursing homes - job satisfaction            |
| Anderson, R. A., L. M. Issel and R. R. McDaniel (2003)                                                                                | 29.40 | USA            | Nursing research                           | Empirical     | Nursing home                                |
| Anthony, M. K., J. Kloos, P. Beam and K. Vidal (2018)                                                                                 | 0     | USA            | Journal of nursing care                    | Non-empirical | Hospital - nursing hand-off                 |
| Arndt, M. and B. Bigelow (2000)                                                                                                       | 4.11  | USA            | Health care management review              | Non-empirical | Management                                  |
| Arruda, C., S. G. R. Lopes, M. H. A. d. L. Koerich, D. R. Winck, B. H. S. Meirelles and A. L. S. F. d. Mello (2015)                   | 2.00  | Brazil         | Escola anna nery                           | Non-empirical | Health care networks                        |
| Ashmos, D. P., J. W. Huonker and R. R. McDaniel (1998)                                                                                | 5.15  | USA            | Health care management review              | Empirical     | Hospital – leadership                       |
| Atun, R. A., I. Kyratsis, G. Jelic, D. Rados-Malicbegovic and I. Gurol-Urganci (2007)                                                 | 7.73  | United Kingdom | Health policy and planning                 | Empirical     | Primary care – reform                       |
| Augustinsson, S. and P. Petersson (2015)                                                                                              | 1.67  | Sweden         | Journal of research in nursing             | Empirical     | Hospital - nursing - discharge planning     |
| Baghbanian, A. and G. Torkfar (2012)                                                                                                  | 1.33  | Australia      | Australian health review                   | Non-empirical | Health system - economics and policy        |
| Bailey, D. E., S. L. Docherty, J. A. Adams, D. L. Carthron, K. Corazzini, J. R. Day, E. Neglia, M. Thygeson and R. A. Anderson (2012) | 5.00  | USA            | Journal of healthcare leadership           | Non-empirical | Leadership                                  |
| Barasa, E. W., S. Molyneux, M. English and S. Cleary (2017)                                                                           | 12.00 | Kenya          | Social science & medicine                  | Empirical     | Hospitals - priority setting                |
| Baskin, K., J. Goldstein and C. Lindberg (2000)                                                                                       | 0.89  | USA            | Physician executive                        | Non-empirical | Mergers                                     |
| Beautement, P. and C. Broenner (2012)                                                                                                 | 0.29  | United Kingdom | Journal of evaluation in clinical practice | Non-empirical | Health care practice                        |
| Bebber, R. and A. Liberman (2008)                                                                                                     | 0.20  | USA            | International journal of public policy     | Non-empirical | Hospital – bioterrorism                     |
| Bedin, D. M., H. B. Kochenberger Scarparo, H. A. Martinez and I. B. Matos (2014)                                                      | 0     | Brazil         | Saude e sociedade                          | Non-empirical | Management                                  |
| Begun, J. W. and A. A. Kaissi (2005)                                                                                                  | 3.15  | USA            | Journal of healthcare management           | Empirical     | Healthcare planning - leadership/management |

|                                                                                                                                                                                                         |       |                |                                                               |               |                                                    |
|---------------------------------------------------------------------------------------------------------------------------------------------------------------------------------------------------------|-------|----------------|---------------------------------------------------------------|---------------|----------------------------------------------------|
| Bell, I. R., M. Koithan and D. Pincus (2012)                                                                                                                                                            | 6.67  | USA            | Forschende komplementarmedizin                                | Non-empirical | Complementary medicine                             |
| Bennett, C. (2003)                                                                                                                                                                                      | 0.13  | Canada         | Healthcare papers                                             | Non-empirical | Health care system – hospital                      |
| Best, A., T. Greenhalgh, S. Lewis, J. E. Saul, S. Carroll and J. Bitz (2012)                                                                                                                            | 40.67 | Canada         | The milbank quarterly                                         | Review        | Health care system – transformation                |
| Betancourt Betancourt, J. A. and R. M. Ramis Andalia (2010)                                                                                                                                             | 1.50  | Cuba           | Revista cubana de salud pública                               | Non-empirical | Health and healthcare generally                    |
| Betancourt Bethencourt, J. A., F. Martínez Álvarez, M. Álvarez Escoda and E. Nicolau Pestano (2016)                                                                                                     | 0     | Cuba           | Humanidades médicas                                           | Non-empirical | Education                                          |
| Betancourt Bethencourt, J. A., R. M. Ramis Andalia and M. Mirabal Nápoles (2014)                                                                                                                        | 2.25  | Cuba           | Revista cubana de salud pública                               | Non-empirical | Primary care – translation                         |
| Bircher, J. and E. G. Hahn (2017)                                                                                                                                                                       | 3.00  | Switzerland    | Cureus                                                        | Non-empirical | Health and healthcare generally                    |
| Bleakley, A. (2006)                                                                                                                                                                                     | 25.60 | United Kingdom | Medical education                                             | Non-empirical | Education                                          |
| Bleakley, A. (2006)a                                                                                                                                                                                    | 4.33  | United Kingdom | Journal of medicine and philosophy                            | Non-empirical | Hospital - operating theatre, teamwork             |
| Bleakley, A. (2010)                                                                                                                                                                                     | 9.38  | United Kingdom | Journal of evaluation in clinical practice                    | Non-empirical | Education                                          |
| Bloom, L. A. and B. S. Bloom (1999)                                                                                                                                                                     | 0.316 | USA            | International journal of technology assessment in health care | Non-empirical | Decision making                                    |
| Bogren, M. U., M. Berg, L. Edgren, E. van Teijlingen and H. Wigert (2016)                                                                                                                               | 1.50  | Sweden         | Sexual and reproductive healthcare                            | Empirical     | Professionalism – midwifery                        |
| Boustani, M. A., A. Frame, S. Munger, P. Healey, J. Westlund, M. Farlow, A. Hake, M. G. Austrom, P. Shepard, C. Bubp, J. Azar, A. Nazir, N. Adams, N. L. Campbell, A. Chehresa and P. Dexter (2012)     | 1.33  | USA            | Clinical interventions in aging                               | Empirical     | Professional network - dementia care – improvement |
| Boustani, M. A., G. A. Sachs, C. A. Alder, S. Munger, C. C. Schubert, M. Guerriero Austrom, A. M. Hake, F. W. Unverzagt, M. Farlow, B. R. Matthews, A. J. Perkins, R. A. Beck and C. M. Callahan (2011) | 14.50 | USA            | Aging & mental health                                         | Empirical     | Primary care - dementia care                       |

|                                                                                                                                                              |       |                |                                             |               |                                                            |
|--------------------------------------------------------------------------------------------------------------------------------------------------------------|-------|----------------|---------------------------------------------|---------------|------------------------------------------------------------|
| Boustani, M. A., S. Munger, R. Gulati, M. Vogel, R. A. Beck and C. M. Callahan (2010)                                                                        | 5.63  | USA            | Clinical interventions in aging             | Non-empirical | Implementation and system change                           |
| Boustani, M., C. Schubert and Y. Sennour (2007)                                                                                                              | 3.55  | USA            | Clinical interventions in aging             | Non-empirical | Primary health care - dementia                             |
| Braa, J., O. Hanseth, A. Heywood, W. Mohammed and V. Shaw (2007)                                                                                             | 35.64 | Norway         | Mis quarterly                               | Non-empirical | Information systems implementation in developing countries |
| Bradley, E. H., L. A. Curry, L. A. Taylor, S. W. Pallas, K. Talbert-Slagle, C. Yuan, A. Fox, D. Minhas, D. K. Ciccone, D. Berg and R. Perez-Escamilla (2012) | 5.17  | USA            | Bmj open                                    | Empirical     | Community/ family health -LMIC                             |
| Brainard, J. and P. R. Hunter (2016)                                                                                                                         | 7.50  | United Kingdom | Implementation science                      | Review        | Research -diverse                                          |
| Brand, S. L., L. E. Fleming and K. M. Wyatt (2015)                                                                                                           | 0.33  | United Kingdom | The scientific world journal                | Non-empirical | Health care organisations - workplace wellbeing            |
| Brannon, S. D., P. Kemper and T. Barry (2009)                                                                                                                | 1.00  | USA            | Health care management review               | Empirical     | Management - health organisations                          |
| Brennan, C. (2016)                                                                                                                                           | 0     | USA            | Plastic surgical nursing                    | Non-empirical | Leadership                                                 |
| Breton, J. J. (1999)                                                                                                                                         | 0.37  | Canada         | Canadian journal of psychiatry              | Non-empirical | Mental health - health promotion                           |
| Bro, F. and J. Kragstrup (2003)                                                                                                                              | 0.20  | Denmark        | Scandinavian journal of primary health care | Non-empirical | Primary health care                                        |
| Brooks, E. and R. Geyer (2012)                                                                                                                               | 1.00  | United Kingdom | Journal of evaluation in clinical practice  | Non-empirical | Health system policy - drug advertising to consumers       |
| Brown, C. A. (2006)                                                                                                                                          | 4.50  | United Kingdom | Disability and rehabilitation               | Non-empirical | Rehabilitation - professionalism                           |
| Brown, C. A. and C. Richardson (2006)                                                                                                                        | 3.67  | United Kingdom | European journal of pain                    | Empirical     | MDT – pain                                                 |
| Browne, A. J., C. Varcoe, M. Ford-Gilboe, C. N. Wathen and E. R. Team (2015)                                                                                 | 5.33  | Canada         | International journal for equity in health  | Non-empirical | Primary care – equity                                      |
| Bujak, J. S. (1999)                                                                                                                                          | 0.63  | USA            | Physician executive                         | Non-empirical | Leadership - culture - medicine                            |
| Bujak, J. S. (2003)                                                                                                                                          | 2.47  | USA            | Frontiers of health service management      | Non-empirical | Leadership                                                 |

|                                                                                                                                     |      |                |                                                          |               |                                                          |
|-------------------------------------------------------------------------------------------------------------------------------------|------|----------------|----------------------------------------------------------|---------------|----------------------------------------------------------|
| Bullas, S. and J. Bryant (2007)                                                                                                     | 0.82 | United Kingdom | Studies in health information technology and informatics | Non-empirical | IT implementation                                        |
| Bungay, V. and J. Stevenson (2013)                                                                                                  | 0.40 | Canada         | Policy, politics, & nursing practice                     | Empirical     | Nurse leaders - reform                                   |
| Burke, J. P. and S. L. Pestotnik (1999)                                                                                             | 0.74 | USA            | Current opinion in infectious diseases                   | Non-empirical | Resistance                                               |
| Burman, C. J., M. Aphane and P. Delobelle (2015)                                                                                    | 3.33 | South Africa   | African journal of aids research                         | Non-empirical | Public health and health promotion - AIDS                |
| Burman, C. J., M. Aphane, O. Mtapuri and P. Delobelle (2015)                                                                        | 2.33 | South Africa   | Sahara-j: journal of social aspects of hiv/aids          | Non-empirical | Health promotion - HIV prevention                        |
| Burns, J. P. (2001)                                                                                                                 | 4.18 | USA            | Journal of nursing administration                        | Non-empirical | Leadership                                               |
| Butt, G., M. Markle-Reid and G. Browne (2008)                                                                                       | 5.80 | Canada         | International journal of integrated care                 | Review        | Integrated care - health and social service partnership  |
| Buttigieg, S. C., V. Cassar and J. W. Scully (2013)                                                                                 | 1.20 | United Kingdom | Journal of health organization and management            | Empirical     | Hospital, leadership, integrated care                    |
| Caffrey, L., C. Wolfe and C. McKevitt (2016)                                                                                        | 4.00 | United Kingdom | Health research policy and systems                       | Empirical     | Health system - implementation and working with research |
| Callahan, C. M., M. A. Boustani, M. Weiner, R. A. Beck, L. R. Livin, J. J. Kellams, D. R. Willis and H. C. Hendrie (2011)           | 9.13 | USA            | Aging & mental health                                    | Non-empirical | Primary care - dementia                                  |
| Canals L, M. and R. Solis (2005)                                                                                                    | 0.85 | Chile          | Revista médica de chile                                  | Non-empirical | Medicine                                                 |
| Carlos, D. M., E. M. M. de Padua, L. M. P. da Silva, M. A. I. Silva, W. E. U. Marques, M. N. D. Leitao and M. D. C. Ferriani (2017) | 1.00 | Brazil         | Journal of clinical nursing                              | Empirical     | Primary health care - family violence                    |
| Carney, T. J. and C. M. Shea (2017)                                                                                                 | 4.00 | USA            | Computational and mathematical methods in medicine       | Non-empirical | Public health - informatics                              |
| Chadwick, M. M. (2010)                                                                                                              | 3.88 | USA            | Aorn journal                                             | Non-empirical | Leadership - nursing                                     |
| Chaffee, M. W. and M. M. McNeill (2007)                                                                                             | 8.64 | USA            | Nursing outlook                                          | Non-empirical | Nursing                                                  |
| Chan, M. K., D. D. Meschino, D. Dath, J. Busari, J. D. Bohnen, L. M. Samson, A. Matlow and M. Sanchez-Mendiola (2016)               | 5.50 | Canada         | Leadership in health services                            | Non-empirical | Education - medical - leadership                         |

|                                                                                                                                                                                           |       |                |                                                  |               |                                                          |
|-------------------------------------------------------------------------------------------------------------------------------------------------------------------------------------------|-------|----------------|--------------------------------------------------|---------------|----------------------------------------------------------|
| Chandler, J., J. Rycroft-Malone, C. Hawkes and J. Noyes (2016)                                                                                                                            | 10.67 | United Kingdom | Journal of advanced nursing                      | Empirical     | Health system - improvement and implementation           |
| Checkland, K., I. McDermott, A. Coleman, L. Warwick-Giles, D. Bramwell, P. Allen and S. Peckham (2018)                                                                                    | 0     | United Kingdom | Public money & management                        | Empirical     | Primary care - oversight, planning, management           |
| Chen, D. T., P. H. Werhane and A. E. Mills (2007)                                                                                                                                         | 1.73  | USA            | Critical care medicine                           | Non-empirical | Hospital - ICU/critical care medicine                    |
| Chinnis, A. and K. R. White (1999)                                                                                                                                                        | 1.26  | USA            | Journal of emergency medicine                    | Non-empirical | Hospital - emergency department                          |
| Chou, S.-M. (2004)                                                                                                                                                                        | 0.07  | China          | Hu li za zhi the journal of nursing              | Non-empirical | Nursing                                                  |
| Christian, C. S. and N. Crisp (2012)                                                                                                                                                      | 1.00  | South Africa   | Development southern africa                      | Empirical     | Public health                                            |
| Chughtai, S. and K. Blanchet (2017)                                                                                                                                                       | 5.00  | Pakistan       | Health policy and planning                       | Review        | Public health                                            |
| Ciemins, E. L., J. Brant, D. Kersten, E. Mullette and D. Dickerson (2016)                                                                                                                 | 2.50  | USA            | Journal of palliative medicine                   | Empirical     | Palliative care - interdisciplinary team work            |
| Clancy, T. R. (2014)                                                                                                                                                                      | 1.00  | USA            | Journal of nursing administration                | Non-empirical | Nursing - workflow                                       |
| Clancy, T. R., C. White Delaney, B. Morrison and J. K. Gunn (2006)                                                                                                                        | 3.50  | USA            | Journal of nursing administration                | Non-empirical | Nursing - documentation                                  |
| Clarke, J. R. (2005)                                                                                                                                                                      | 1.62  | USA            | Journal of the american college of surgeons      | Non-empirical | Hospital - surgery - patient safety                      |
| Cloninger, C. R. (2013)                                                                                                                                                                   | 3.40  | USA            | International journal of person centred medicine | Non-empirical | Health promotion - chronic disease - person-centred care |
| Cockings, J. G., D. A. Cook and R. K. Iqbal (2006)                                                                                                                                        | 2.42  | United Kingdom | Critical care                                    | Empirical     | Hospital - quality and surveillance                      |
| Colon-Emeric, C. S., D. Lekan-Rutledge, Q. Utley-Smith, N. Ammarell, D. Bailey, M. L. Piven, K. Corazzini and R. A. Anderson (2006)                                                       | 3.25  | USA            | Health care management review                    | Empirical     | Nursing homes                                            |
| Colon-Emeric, C. S., K. Corazzini, E. S. McConnell, W. Pan, M. Toles, R. Hall, M. P. Cary, M. Batchelor-Murphy, T. Yap, A. L. Anderson, A. Burd, S. Amarasekara and R. A. Anderson (2017) | 2.00  | USA            | Jama internal medicine                           | Empirical     | Nursing homes                                            |

|                                                                                                                                          |       |                |                                            |                    |                                                                 |
|------------------------------------------------------------------------------------------------------------------------------------------|-------|----------------|--------------------------------------------|--------------------|-----------------------------------------------------------------|
| Colon-Emeric, C. S., N. Ammarell, C. Bailey, C. Kirsten, D. Lekan-Rutledge, M. Piven and R. Anderson (2005)                              | 0.08  | USA            | Journal of the american geriatrics society | Unable to classify | Nursing                                                         |
| Colon-Emeric, C. S., N. Ammarell, D. Bailey, K. Corazzini, D. Lekan-Rutledge, M. L. Piven, Q. Utley-Smith and R. A. Anderson (2006)      | 6.58  | USA            | Qualitative health research                | Empirical          | Nursing home - communication between medicine-nursing           |
| Cooper, A. and B. Wren (2012)                                                                                                            | 1.33  | United Kingdom | Psychoanalytic psychotherapy               | Non-empirical      | Mental health                                                   |
| Cooper, H. and E. Spencer-Dawe (2006)                                                                                                    | 7.75  | United Kingdom | Journal of integrated care                 | Empirical          | Education - interprofessional                                   |
| Cooper, H. and R. Geyer (2008)                                                                                                           | 3.30  | United Kingdom | Social science & medicine                  | Non-empirical      | Education                                                       |
| Cooper, H. and R. Geyer (2009)                                                                                                           | 2.33  | United Kingdom | Journal of evaluation in clinical practice | Non-empirical      | Chronic disease management – diabetes                           |
| Cooper, H., E. Spencer-Dawe and E. McLean (2005)                                                                                         | 10.15 | United Kingdom | Journal of interprofessional care          | Empirical          | Education - medicine, nursing, physiotherapy, OT undergraduates |
| Copelli, F. H. d. S., R. J. T. d. Oliveira, C. M. S. d. Oliveira, B. H. S. Meirelles, A. L. S. F. d. Mello and A. L. P. Magalhães (2016) | 1.50  | Brazil         | Aquichan                                   | Review             | Nursing - leadership                                            |
| Copnell, B. (1998)                                                                                                                       | 1.00  | Australia      | Journal of advanced nursing                | Non-empirical      | Nursing - nursing knowledge                                     |
| Coppa, D. F. (1993)                                                                                                                      | 1.84  | USA            | Journal of advanced nursing                | Non-empirical      | Nursing                                                         |
| Cornforth, A. (2013)                                                                                                                     | 1.60  | United Kingdom | British journal of nursing                 | Non-empirical      | Primary care - self-management – COPD                           |
| Crabtree, B. F. (2003)                                                                                                                   | 3.13  | USA            | Health care management review              | Non-empirical      | Primary care                                                    |
| Crabtree, B. F., P. A. Nutting, W. L. Miller, R. R. McDaniel, K. C. Stange, C. R. Jaen and E. Stewart (2011)                             | 17.57 | USA            | Medical care                               | Non-empirical      | Primary care - change/improvement                               |
| Crabtree, B. F., W. L. Miller and K. C. Stange (2001)                                                                                    | 9.53  | USA            | Journal of family practice                 | Empirical          | Primary care                                                    |
| Cruz, R. A., E. L. Araujo, N. M. Nascimento, R. J. Lima, J. R. Franca and J. D. Oliveira (2017)                                          | 1.00  | Brazil         | Revista brasileira de enfermagem           | Unable to classify | Nursing - education                                             |

|                                                                                                                             |      |                 |                                                |               |                                                            |
|-----------------------------------------------------------------------------------------------------------------------------|------|-----------------|------------------------------------------------|---------------|------------------------------------------------------------|
| Cucolo, D. F. and M. G. Perroca (2015)                                                                                      | 3.67 | Brazil          | Acta paulista de enfermagem                    | Empirical     | Nursing                                                    |
| Curtis, S. and M. Riva (2010)                                                                                               | 8.63 | United Kingdom  | Progress in human geography                    | Non-empirical | Human geography and health systems                         |
| Curtis, S. and M. Riva (2010)a                                                                                              | 4.63 | United Kingdom  | Progress in human geography                    | Non-empirical | Human geography and health systems and policy              |
| Curtis, S., K. Oven, J. Wistow, C. Dunn and L. Dominelli (2018)                                                             | 3.00 | United Kingdom  | Environment and planning c: politics and space | Empirical     | Aged - health and social care                              |
| da Silva, A. L. and M. G. de Freitas (2010)                                                                                 | 0.50 | Brazil          | Revista da escola de enfermagem da usp         | Empirical     | Education                                                  |
| D'Agata, A. L. and J. M. McGrath (2016)                                                                                     | 2.50 | USA             | Advances in nursing science                    | Non-empirical | Hospital - neonatal ICU                                    |
| Dattee, B. and J. Barlow (2010)                                                                                             | 4.50 | United Kingdom  | Journal of health services research and policy | Empirical     | Whole system change                                        |
| Dattee, B. and J. Barlow (2017)                                                                                             | 1.00 | France          | Organization science                           | Empirical     | Healthcare system                                          |
| Davis, B. and D. Sumara (2010)                                                                                              | 9.25 | Canada          | Journal of evaluation in clinical practice     | Non-empirical | Research - education                                       |
| de Bock, B. A., D. L. Willems and H. C. Weinstein (2018)                                                                    | 1.00 | The Netherlands | Journal of evaluation in clinical practice     | Empirical     | Hospital - ICU, decision making                            |
| De Simone, J. (2006)                                                                                                        | 2.33 | Italy           | Journal of evaluation in clinical practice     | Non-empirical | Evidence-based medicine                                    |
| De Vito, E. L. (2016)                                                                                                       | 0    | Argentina       | Medicina                                       | Non-empirical | Medicine                                                   |
| de Zulueta, P. C. (2016)                                                                                                    | 9.50 | United Kingdom  | Journal of healthcare leadership               | Non-empirical | Leadership - compassionate leadership                      |
| deMattos, P. C., D. M. Miller and E. H. Park (2012)                                                                         | 2.83 | USA             | Management decision                            | Non-empirical | Hospital - trauma- decision making                         |
| Deutsch, E. S., Y. Dong, L. P. Halamek, M. A. Rosen, J. M. Taekman and J. Rice (2016)                                       | 2.50 | USA             | Human factors                                  | Non-empirical | Education                                                  |
| Doebbeling, B. N. and M. E. Flanagan (2011)                                                                                 | 1.86 | USA             | Medical care                                   | Non-empirical | Healthcare systems                                         |
| Doll, W. E. and D. Trueit (2010)                                                                                            | 5.88 | USA             | Journal of evaluation in clinical practice     | Non-empirical | Healthcare professionals broadly                           |
| Donaldson, A., E. Lank and J. Maher (2005)                                                                                  | 1.85 | United Kingdom  | Journal of change management                   | Non-empirical | Education and learning - communities of practice in cancer |
| Donini, L. M., R. D. Grave, A. Caretto, L. Lucchin, N. Melchionda, E. Nisoli, P. Sbraccia, A. Lenzi and M. Cuzzolaro (2014) | 1.75 | Italy           | Eating and weight disorders                    | Non-empirical | Health condition and its management - obesity              |



|                                                                                               |       |                |                                                     |                    |                                            |
|-----------------------------------------------------------------------------------------------|-------|----------------|-----------------------------------------------------|--------------------|--------------------------------------------|
| Donnelly, F. and R. Wiechula (2012)                                                           | 2.17  | Australia      | Nurse education today                               | Non-empirical      | Education - nurse placement                |
| Dreher, M. C., P. Clinton and A. Sperhac (2014)                                               | 2.50  | USA            | Journal of professional nursing                     | Non-empirical      | Education                                  |
| Dunn, K. S. and C. K. Riley-Doucet (2017)                                                     | 0     | USA            | Nurse educator                                      | Unable to classify | Nursing                                    |
| Durie, R. and K. Wyatt (2007)                                                                 | 3.18  | United Kingdom | Social science & medicine                           | Empirical          | Health geography                           |
| Durie, R. and K. Wyatt (2013)                                                                 | 4.20  | United Kingdom | Critical public health                              | Empirical          | Community and public health                |
| Dyck, L. R., A. Caron and D. Aron (2006)                                                      | 1.58  | USA            | Journal of management development                   | Non-empirical      | Change/improvement                         |
| Edgren, L. (2008)                                                                             | 10.10 | Sweden         | International journal of integrated care            | Non-empirical      | Integrated care                            |
| Edgren, L. and K. Barnard (2012)                                                              | 8.33  | Sweden         | Leadership in health services                       | Non-empirical      | Health and social care integration         |
| Eika, M., B. Dale, G. A. Espnes and S. Hvalvik (2015)                                         | 3.67  | Norway         | Bmc health services research                        | Empirical          | Nursing homes - nursing - care transitions |
| Ellis, B. (2010)                                                                              | 4.13  | United Kingdom | Informatics in primary care                         | Empirical          | Primary care                               |
| Ellis, B. and S. I. Herbert (2011)                                                            | 6.43  | United Kingdom | Informatics in primary care                         | Non-empirical      | Primary care - clinical governance         |
| Ellis, L. A., K. Churruca and J. Braithwaite (2017)                                           | 2.00  | Australia      | International journal of mental health systems      | Non-empirical      | Mental health services                     |
| Ellsbury, D. L. (2010)                                                                        | 0.88  | USA            | Clinics in perinatology                             | Non-empirical      | Hospital - neonatal medicine               |
| Erdek, M. A. and P. J. Pronovost (2004)                                                       | 7.50  | USA            | International journal for quality in health care    | Empirical          | Hospital - pain assessment                 |
| Erdmann, A. L., K. C. d. Nascimento, G. Marcelino and J. A. Ribeiro (2005)                    | 1.85  | Brazil         | Fascicles of escola anna nery revista de enfermagem | Empirical          | Education - graduate nurses                |
| Essen, A. and S. Lindblad (2013)                                                              | 7.33  | Sweden         | Social science & medicine                           | Empirical          | Rheumatology                               |
| Fajardo Ortiz, G. (2013)                                                                      | 0     | Mexico         | Ludus vitalis                                       | Non-empirical      | Medicine                                   |
| Fajardo-Ortiz, G., M. A. Fernandez-Ortega, A. Ortiz-Montalvo and R. A. Olivares-Santos (2015) | 0.67  | Mexico         | Cirugía y cirujanos (english edition)               | Non-empirical      | Health systems                             |
| Farmer, E. A., J. D. Beard, W. D. Dauphinee, T. LaDuca and K. V. Mann (2002)                  | 2.19  | Australia      | Medical education                                   | Non-empirical      | Medical performance assessment             |

|                                                                                                                           |       |                |                                                 |               |                                          |
|---------------------------------------------------------------------------------------------------------------------------|-------|----------------|-------------------------------------------------|---------------|------------------------------------------|
| Favaretti, C. (2013)                                                                                                      | 0.40  | Italy          | Recenti progressi in medicina                   | Non-empirical | Health care organisations generally      |
| Fennell, M. L. and C. M. Adams (2011)                                                                                     | 2.43  | USA            | Annual review of sociology                      | Non-empirical | Health care organisations generally      |
| Fenwick, T. (2012)                                                                                                        | 6.83  | United Kingdom | Journal of education and work                   | Non-empirical | Education - learning for collaboration   |
| Fenwick, T. and M. A. Dahlgren (2015)                                                                                     | 16.33 | United Kingdom | Medical education                               | Non-empirical | Education                                |
| Fernandez, A., J. Sturmberg, S. Lukersmith, R. Madden, G. Torkfar, R. Colagiuri and L. Salvador-Carulla (2015)            | 10.67 | Australia      | Health research policy and systems              | Non-empirical | Evidence-based medicine movement history |
| Florczak, K., M. Poradzisz and S. Hampson (2012)                                                                          | 1.00  | USA            | Nursing science quarterly                       | Non-empirical | Nursing profession                       |
| Fontanesi, J., A. Martinez, T. O. Boyo and R. Gish (2015)                                                                 | 0.33  | USA            | The journal of medical practice management: mpm | Empirical     | Quality improvement                      |
| Forbes-Thompson, S., T. Leiker and M. R. Bleich (2007)                                                                    | 4.91  | USA            | Health care management review                   | Empirical     | Nursing homes                            |
| Ford, R. (2009)                                                                                                           | 5.56  | USA            | Health services management research             | Empirical     | Leadership                               |
| Frame, A., M. LaMantia, B. B. Reddy Bynagari, P. Dexter and M. Boustani (2013)                                            | 2.20  | USA            | Egems                                           | Empirical     | Primary care - EHR – improvement         |
| Fraser, S. W. and T. Greenhalgh (2001)                                                                                    | 50.59 | United Kingdom | Bmj open                                        | Non-empirical | Education                                |
| Frasso, R., A. Golinkoff, H. Klusaritz, K. Kellom, H. Kollar-McArthur, M. Miller-Day, R. Gabbay and P. F. Cronholm (2017) | 1.00  | USA            | Applied nursing research                        | Empirical     | Primary care - nurse-led practices       |
| Freddi, G. and J. L. Roman-Pumar (2011)                                                                                   | 2.00  | Italy          | Annali dell istituto superiore di sanita        | Non-empirical | Evidence-based medicine                  |
| Freed, D. H. (1995)                                                                                                       | 0     | USA            | Hospital material management quarterly          | Non-empirical | Health care generally - quality          |
| Friel, S., L. Hattersley and R. Townsend (2015)                                                                           | 9.33  | Australia      | Annual review of public health                  | Non-empirical | Public health - trade                    |
| Frye, A. W. and P. A. Hemmer (2012)                                                                                       | 28.00 | USA            | Medical teacher                                 | Non-empirical | Education                                |

|                                                                                                                                                                    |       |                |                                            |               |                                                 |
|--------------------------------------------------------------------------------------------------------------------------------------------------------------------|-------|----------------|--------------------------------------------|---------------|-------------------------------------------------|
| Gardam, M., L. Gitterman, L. Rykert and E. Vicencio (2017)                                                                                                         | 0     | Canada         | Healthcare papers                          | Non-empirical | Health care delivery - safety                   |
| Gary, J. C. (2014)                                                                                                                                                 | 1.25  | USA            | Dimensions of critical care nursing        | Empirical     | Improving patient-centred care - nursing - ICU  |
| Gatrell, A. C. (2005)                                                                                                                                              | 13.54 | United Kingdom | Social science & medicine                  | Non-empirical | Health geography                                |
| Gear, C., J. Koziol-McLain, D. Wilson and F. Clark (2016)                                                                                                          | 1.00  | New Zealand    | Bmc family practice                        | Empirical     | Primary care - family violence                  |
| Geary, C. R. and K. L. Schumacher (2012)                                                                                                                           | 7.17  | USA            | Advances in nursing science                | Non-empirical | Care transitions                                |
| Ghazzawi, A., C. Kuziemyky and T. O'Sullivan (2016)                                                                                                                | 3.50  | Canada         | Bmc health services research               | Empirical     | Stroke - rehabilitation - carers                |
| Glenn, L. A., J. Stocker-Schnieder, R. McCune, M. McClelland and D. King (2014)                                                                                    | 2.00  | USA            | Journal of advanced nursing                | Empirical     | Hospital - nursing maternity care during labour |
| Glynn, L. G. and R. Scully (2010)                                                                                                                                  | 1.00  | United Kingdom | International journal of clinical practice | Non-empirical | Healthcare generally                            |
| Goldberger, A. L. (1996)                                                                                                                                           | 39.59 | USA            | The lancet                                 | Non-empirical | Medical practice                                |
| Goldman, E., M. Plack, C. Roche, J. Smith and C. Turley (2009)                                                                                                     | 5.11  | USA            | Journal of workplace learning              | Empirical     | Hospital - emergency department/ learning       |
| Gonnering, R. S. (2010)                                                                                                                                            | 1.00  | USA            | Journal of surgical education              | Non-empirical | Education - surgical                            |
| Gonzalez, M. G., K. N. Kelly, A. M. Dozier, F. Fleming, J. R. T. Monson, A. Z. Becerra, C. T. Aquina, C. P. Probst, B. J. Hensley, N. Sevdalis and K. Noyes (2017) | 1.00  | USA            | Qualitative health research                | Empirical     | Hospital - surgical care – transitions          |
| Gordon, L., C. Rees, J. Ker and J. Cleland (2017)                                                                                                                  | 1.00  | United Kingdom | Advances in health sciences education      | Empirical     | Leadership                                      |
| Gormley, G. J. and T. Fenwick (2016)                                                                                                                               | 3.00  | United Kingdom | Perspectives on medical education          | Empirical     | Education - medical                             |
| Grady, C. M. (2016)                                                                                                                                                | 4.00  | Canada         | Leadership in health services              | Empirical     | Leadership - medical                            |
| Green, C. A., S. E. Estroff, B. J. H. Yarborough, M. Spofford, M. R. Solloway, R. S. Kitson and N. A. Perrin (2014)                                                | 5.75  | USA            | Schizophrenia bulletin                     | Non-empirical | Mental health care                              |
| Greene, R. A., E. Dasso, S. Ho and A. M. Genaidy (2014)                                                                                                            | 2.25  | USA            | Population health management               | Non-empirical | Health care systems - person-centred care       |

|                                                                                                                                                     |       |                |                                                                                  |                    |                                     |
|-----------------------------------------------------------------------------------------------------------------------------------------------------|-------|----------------|----------------------------------------------------------------------------------|--------------------|-------------------------------------|
| Greenhalgh, T., P. Plsek, T. Wilson, S. Fraser and T. Holt (2010)                                                                                   | 5.88  | United Kingdom | Journal of health services research and policy                                   | Non-empirical      | Research                            |
| Griffiths, F. and D. Byrne (1998)                                                                                                                   | 4.20  | United Kingdom | British journal of general practice                                              | Non-empirical      | Primary care                        |
| Griffiths, F. and G. North American Primary Care Research (2007)                                                                                    | 1.45  | United Kingdom | Annals of family medicine                                                        | Non-empirical      | Primary care                        |
| Grudniewicz, A., T. Tenbenschel, J. M. Evans, C. Steele Gray, G. R. Baker and W. P. Wodchis (2018)                                                  | 0     | Canada         | Social science & medicine                                                        | Empirical          | Health policy - integrated care     |
| Haffeld, J. (2012)                                                                                                                                  | 2.67  | Norway         | Global public health: an international journal for research, policy and practice | Non-empirical      | Global health system                |
| Haffeld, J. (2013)                                                                                                                                  | 1.40  | USA            | Reproductive health matters                                                      | Non-empirical      | Health systems - governance         |
| Haffeld, J. and H. Siem (2013)                                                                                                                      | 1.00  | Norway         | Current pharmogenomics and personalized medicine                                 | Unable to classify | Policy and governance international |
| Hafferty, F. W. and B. Castellani (2010)                                                                                                            | 13.50 | USA            | Academic medicine                                                                | Non-empirical      | Medical professionalism             |
| Hafferty, F. W. and D. Levinson (2008)                                                                                                              | 9.50  | USA            | Perspectives in biology and medicine                                             | Non-empirical      | Medicine - professionalism          |
| Haigh, C. (2002)                                                                                                                                    | 3.81  | United Kingdom | Journal of advanced nursing                                                      | Non-empirical      | Nursing                             |
| Haigh, C. A. (2008)                                                                                                                                 | 0.80  | United Kingdom | Journal of nursing management                                                    | Empirical          | Nursing - management                |
| Hall, P., L. Weaver and P. A. Grassau (2013)                                                                                                        | 4.40  | Canada         | Journal of interprofessional care                                                | Non-empirical      | Integrated care - education         |
| Hamilton, A. B., M. M. Farmer, T. Moin, E. P. Finley, A. J. Lang, S. M. Oishi, A. K. Huynh, J. Zuchowski, S. G. Haskell and B. Bean-Mayberry (2017) | 1.00  | USA            | Implementation science                                                           | Non-empirical      | Primary care - women's health       |
| Hammerly, M. (2002)                                                                                                                                 | 0.44  | USA            | American journal of medical quality                                              | Non-empirical      | Collaborative medicine              |
| Hanseth, O., E. Jacucci, M. Grisot and M. Aanestad (2006)                                                                                           | 21.75 | Norway         | Mis quarterly                                                                    | Empirical          | Hospital – HER                      |
| Hast, A. S., A. M. DiGioia, D. Thompson and G. Wolf (2013)                                                                                          | 3.00  | USA            | Journal of nursing administration                                                | Unable to classify | Organisational change               |

|                                                                                                                                                                                                                                                                                                                                   |       |           |                                                                                                    |               |                                            |
|-----------------------------------------------------------------------------------------------------------------------------------------------------------------------------------------------------------------------------------------------------------------------------------------------------------------------------------|-------|-----------|----------------------------------------------------------------------------------------------------|---------------|--------------------------------------------|
| Henriksen, E. and U. Rosenqvist (2003)                                                                                                                                                                                                                                                                                            | 2.33  | Sweden    | Health & social care in the community                                                              | Empirical     | Aged care                                  |
| Hill, P. S. (2011)                                                                                                                                                                                                                                                                                                                | 11.13 | Australia | Global public health: an international journal for research, policy and practice                   | Non-empirical | Governance - health care systems           |
| Hilts, L., M. Howard, D. Price, C. Risdon, G. Agarwal and A. Childs (2013)                                                                                                                                                                                                                                                        | 3.40  | Canada    | Family practice                                                                                    | Empirical     | Primary care                               |
| Ho, S. and L. G. Sandy (2014)                                                                                                                                                                                                                                                                                                     | 1.75  | USA       | Journal of general internal medicine                                                               | Non-empirical | Health care system - economics and funding |
| Hoben, M., P. G. Norton, L. R. Ginsburg, R. A. Anderson, G. G. Cummings, H. J. Lanham, J. E. Squires, D. Taylor, A. S. Wagg and C. A. Estabrooks (2017)                                                                                                                                                                           | 5.00  | Canada    | Trials                                                                                             | Non-empirical | Nursing home - quality and improvement     |
| Hodges, H. F. (2011)                                                                                                                                                                                                                                                                                                              | 7.43  | USA       | Journal of nursing education                                                                       | Empirical     | Education - nursing                        |
| Hoffman, E. (2000)                                                                                                                                                                                                                                                                                                                | 1.22  | USA       | Academic medicine                                                                                  | Non-empirical | Women's health - educating about           |
| Holden, L. M. (2005)                                                                                                                                                                                                                                                                                                              | 14.46 | USA       | Journal of advanced nursing                                                                        | Non-empirical | Nursing                                    |
| Holder, R. and C. Ramagem (2012)                                                                                                                                                                                                                                                                                                  | 2.17  | USA       | World hospitals and health services: the official journal of the international hospital federation | Non-empirical | Leadership                                 |
| Holmboe, E. S. (2018)                                                                                                                                                                                                                                                                                                             | 3.00  | USA       | Academic medicine                                                                                  | Non-empirical | Education - medicine                       |
| Homa, L., J. Rose, P. S. Hovmand, S. T. Cherng, R. L. Riolo, A. Kraus, A. Biswas, K. Burgess, H. Aungst, K. C. Stange, K. Brown, M. Brooks-Terry, E. Dec, B. Jackson, J. Gilliam, G. E. Kikano, A. Reichsman, D. Schaadt, J. Hilfer, C. Ticknor, C. V. Tyler, A. Van der Meulen, H. Ways, R. F. Weinberger and C. Williams (2015) | 5.00  | USA       | Annals of family medicine                                                                          | Empirical     | Primary care                               |
| Hopkinson, S. G. and D. L. Wiegand (2017)                                                                                                                                                                                                                                                                                         | 0     | USA       | Journal of clinical nursing                                                                        | Empirical     | Nursing practice                           |
| Horvat, A. and J. Filipovic (2018)                                                                                                                                                                                                                                                                                                | 5.00  | Serbia    | Journal of evaluation in clinical practice                                                         | Empirical     | Leadership                                 |
| Hunt, S. R., K. Corazzini and R. A. Anderson (2014)                                                                                                                                                                                                                                                                               | 4.50  | USA       | Journal of applied gerontology                                                                     | Empirical     | Nursing homes - management - care quality  |

|                                                                                                                                   |      |                              |                                                 |               |                                                     |
|-----------------------------------------------------------------------------------------------------------------------------------|------|------------------------------|-------------------------------------------------|---------------|-----------------------------------------------------|
| Hutchison, D. (1994)                                                                                                              | 0.54 | USA                          | Quality progress                                | Non-empirical | Quality management - health care organisation       |
| Innes, A. D., P.D. Campion and F.E. Griffiths (2005)                                                                              | 8.15 | United Kingdom               | British journal of general practice             | Non-empirical | Clinical consultation                               |
| Irimu, G. W., A. Greene, D. Gathara, H. Kihara, C. Maina, D. Mbori-Ngacha, D. Zurovac, M. Santau, J. Todd and M. English (2014)   | 1.50 | Kenya                        | Bmc health services research                    | Empirical     | Implementation of CPGs                              |
| Issel, L. M. and R. A. Anderson (2001)                                                                                            | 0.88 | USA                          | Research in nursing and health                  | Empirical     | Community case managers - nursing - decision making |
| James, K. M. (2010)                                                                                                               | 3.38 | USA                          | Creative nursing                                | Non-empirical | Education - nursing                                 |
| Jana, M., L. Letsela, E. Scheepers and R. Weiner (2015)                                                                           | 1.00 | South Africa                 | Journal of health communication                 | Non-empirical | Public health - health promotion/communication      |
| Jolley, G. (2014)                                                                                                                 | 9.00 | Australia                    | Evaluation and program planning                 | Non-empirical | Health promotion - community care                   |
| Joly, B. M., M. Booth, P. Mittal and G. Shaler (2012)                                                                             | 3.17 | USA                          | Evaluation & the health professions             | Non-empirical | Quality improvement                                 |
| Jorm, C. and C. Roberts (2018)                                                                                                    | 3.00 | Australia                    | Academic medicine                               | Non-empirical | Education - evaluation                              |
| Jorm, C., G. Nisbet, C. Roberts, C. Gordon, S. Gentilcore and T. F. Chen (2016)                                                   | 4.50 | Australia                    | Bmc medical education                           | Empirical     | Education - interprofessional learning              |
| Joshi, R., D. Joshi and P. Cheriya (2017)                                                                                         | 5.00 | USA                          | Patient preference and adherence                | Empirical     | Diabetes management - technology app                |
| Juarez, F. (2010)                                                                                                                 | 0    | Colombia                     | International journal of psychological research | Empirical     | Health system - economic                            |
| Kaehne, A. (2016)                                                                                                                 | 3.00 | United Kingdom               | Journal of integrated care                      | Non-empirical | Programme evaluation (integration programmes)       |
| Kapp, J. M., E. J. Simoes, A. DeBiasi and S. J. Kravet (2017)                                                                     | 4.00 | USA                          | Systems research and behavioural science        | Non-empirical | Population health - improvement                     |
| Karam, E., M. C. Levesque, G. Jacquemin, A. Delure, I. Robidoux, M. T. Laramée, A. Odobescu, P. G. Harris and A. M. Danino (2014) | 1.50 | Canada                       | Annals of burns and fire disasters              | Empirical     | Multidisciplinary teams                             |
| Karemere, H. and J. Macq (2014)                                                                                                   | 0.50 | Democratic Republic of Congo | Global health promotion                         | Empirical     | Hospital                                            |

|                                                                                                    |      |                              |                                            |               |                                                                                |
|----------------------------------------------------------------------------------------------------|------|------------------------------|--------------------------------------------|---------------|--------------------------------------------------------------------------------|
| Karemere, H., J. B. Kahindo, N. Ribesse and J. Macq (2013)                                         | 0.40 | Democratic Republic of Congo | Medecine et sante tropicales               | Non-empirical | Hospital - governance                                                          |
| Karemere, H., N. Ribesse, B. Marchal and J. Macq (2015)                                            | 1.00 | Democratic Republic of Congo | Conflict and health                        | Empirical     | Hospital                                                                       |
| Karemere, H., N. Ribesse, J.-B. Kahindo and J. Macq (2015)                                         | 1.00 | Democratic Republic of Congo | The pan african medical journal            | Empirical     | Hospital                                                                       |
| Katerndahl, D., R. Wood and C. R. Jaen (2017)                                                      | 0    | USA                          | Journal of evaluation in clinical practice | Empirical     | Ambulatory care                                                                |
| Kernick, D. (2006)                                                                                 | 7.75 | United Kingdom               | Family practice                            | Non-empirical | Health service generally                                                       |
| Kernick, D. and A. Mitchell (2010)                                                                 | 1.56 | United Kingdom               | Journal of interprofessional care          | Non-empirical | Co-production - patient-centredness                                            |
| Khan, B. A., S. Lasiter and M. A. Boustani (2015)                                                  | 0    | USA                          | The american journal of nursing            | Non-empirical | Hospital - ICU                                                                 |
| Khan, S., A. Vandermorris, J. Shepherd, J. W. Begun, H. J. Lanham, M. Uhl-Bien and W. Berta (2018) | 0    | Canada                       | Bmc health services research               | Non-empirical | Healthcare generally                                                           |
| Khan, Y., S. Sanford, D. Sider, K. Moore, G. Garber, E. de Villa and B. Schwartz (2017)            | 0    | Canada                       | Bmc health services research               | Empirical     | Hospital and public health - emergency departments during "emerging incidents" |
| Khayal, I. S. and A. M. Farid (2018)                                                               | 2.00 | USA                          | Complexity                                 | Non-empirical | Health care systems - chronic care                                             |
| Killingsworth, B., H. E. Newkirk and E. Seeman (2006)                                              | 2.08 | USA                          | Health care management review              | Non-empirical | Hospital - strategic information systems                                       |
| Kingsley, P. and E. M. Taylor (2017)                                                               | 9.00 | United Kingdom               | Parasitology                               | Non-empirical | Health care systems - integration                                              |
| Koerich, M. S., D. S. Backes, K. C. d. Nascimento and A. L. Erdmann (2007)                         | 3.82 | Brazil                       | Acta paulista de enfermagem                | Empirical     | Hospital - nursing assistant                                                   |
| Koerner, J. (2009)                                                                                 | 1.11 | USA                          | Creative nursing                           | Non-empirical | Nursing - decision making                                                      |
| Koerner, J. G. (1996)                                                                              | 0.36 | USA                          | Nursing administration quarterly           | Non-empirical | Nursing                                                                        |

|                                                                                                                                             |      |                |                                               |               |                                            |
|---------------------------------------------------------------------------------------------------------------------------------------------|------|----------------|-----------------------------------------------|---------------|--------------------------------------------|
| Kottke, T. E., J. A. Huebsch, P. McGinnis, J. M. Nichols, E. D. Parker, J. O. Tillema and M. V. Maciosek (2016)                             | 2.00 | USA            | The permanente journal                        | Empirical     | Primary care - collaboration               |
| Kramer, M., B. B. Brewer, D. Halfer, P. Maguire, S. Beausoleil, K. Claman, M. Macphee and J. B. Duchscher (2013)                            | 4.40 | USA            | Journal of nursing management                 | Empirical     | Nursing                                    |
| Kuipers, P., D. Harvey, M. Lindeman and K. Stothers (2014)                                                                                  | 1.25 | AUstralia      | Rural and remote health                       | Non-empirical | Workforce - rural - education and training |
| Kuziemy, C. (2016)                                                                                                                          | 6.33 | Canada         | Healthcare management forum                   | Non-empirical | Decision making                            |
| Kuziemy, C. E., E. M. Borycki and A. W. Kushniruk (2016)                                                                                    | 0.50 | Canada         | Nursing informatics                           | Non-empirical | Health information technology              |
| Lachman, P., A. Jayadev and M. Rahi (2014)                                                                                                  | 3.50 | United Kingdom | Early human development                       | Non-empirical | Hospital - NICU                            |
| Laliberte, M., D. E Feldman, B. Williams-Jones and M. Hunt (2018)                                                                           | 0    | Canada         | Physiotherapy theory and practice             | Empirical     | Physiotherapy - prioritising care          |
| Lalley, C. (2014)                                                                                                                           | 1.75 | USA            | Nursing administration quarterly              | Empirical     | Nursing - leadership - workarounds         |
| Lamarche, P. and L. Maillet (2016)                                                                                                          | 1.00 | Canada         | Journal of health organization and management | Non-empirical | Primary care                               |
| Landis-Lewis, Z., R. Manjomo, O. J. Gadabu, M. Kam, B. N. Simwaka, S. L. Zickmund, F. Chimbwandira, G. P. Douglas and R. S. Jacobson (2015) | 3.67 | USA            | International journal of medical informatics  | Empirical     | Health system - Malawi EMR implementation  |
| Lanham, H. J., L. K. Leykum, B. S. Taylor, C. J. McCannon, C. Lindberg and R. T. Lester (2013)                                              | 15.6 | USA            | Social science & medicine                     | Non-empirical | Health care systems                        |
| Larkin, D. J., R. C. Swanson, S. Fuller and D. A. Cortese (2016)                                                                            | 7.00 | USA            | Journal of evaluation in clinical practice    | Non-empirical | Health system - US and affordable care act |
| Laudenslager, M. L. (2014)                                                                                                                  | 3.25 | USA            | Brain, behavior, and immunity                 | Non-empirical | Caregivers                                 |
| Laurenson, M., T. Heath and S. Gribbin (2012)                                                                                               | 0.60 | United Kingdom | Journal of healthcare leadership              | Empirical     | Education - leadership                     |



|                                                                                                                                                           |       |                |                                        |               |                                                                   |
|-----------------------------------------------------------------------------------------------------------------------------------------------------------|-------|----------------|----------------------------------------|---------------|-------------------------------------------------------------------|
| Learmonth, A. M., E. J. Henderson and D. J. Hunter (2017)                                                                                                 | 0     | United Kingdom | Journal of public health               | Empirical     | Public health                                                     |
| Lefroy, J. and S. Yardley (2015)                                                                                                                          | 3.00  | United Kingdom | Medical education                      | Non-empirical | Education                                                         |
| Lemak, C. H. and E. Goodrick (2003)                                                                                                                       | 1.67  | USA            | Health care management review          | Empirical     | Primary care - dental, medical, social for low income populations |
| Lessard, C. (2007)                                                                                                                                        | 6.09  | Canada         | Social science & medicine              | Non-empirical | Research - economic evaluation                                    |
| Lett, M. (2001)                                                                                                                                           | 0.53  | Australia      | Australian journal of advanced nursing | Non-empirical | Nursing practice                                                  |
| Leykum, L. K., H. J. Lanham, J. A. Pugh, M. Parchman, R. A. Anderson, B. F. Crabtree, P. A. Nutting, W. L. Miller, K. C. Stange and R. R. McDaniel (2014) | 8.00  | USA            | Implementation science                 | Empirical     | Improvement                                                       |
| Leykum, L. K., J. A. Pugh, H. J. Lanham, J. Harmon and R. R. McDaniel (2009)                                                                              | 9.11  | USA            | Implementation science                 | Non-empirical | Implementation - evidence-based practice                          |
| Leykum, L. K., J. Pugh, V. Lawrence, M. Parchman, P. H. Noel, J. Cornell and R. R. McDaniel (2007)                                                        | 6.82  | USA            | Implementation science                 | Review        | Diabetes care                                                     |
| Lindberg, C. and M. Schneider (2013)                                                                                                                      | 2.60  | USA            | Leadership                             | Empirical     | Leadership                                                        |
| Lindberg, C., A. Herzog, M. Merry and J. Goldstein (1998)                                                                                                 | 0.25  | USA            | Physician executive                    | Non-empirical | Leadership                                                        |
| Litaker, D., A. Tomolo, V. Liberatore, K. C. Stange and D. Aron (2006)                                                                                    | 11.83 | USA            | Journal of general internal medicine   | Non-empirical | Primary care - quality improvement                                |
| Liu, Y. (2008)                                                                                                                                            | 2.20  | USA            | Journal of nursing management          | Non-empirical | Nursing - communication - decision making - cross culture         |
| Liu, Z. C., D. Rexachs, F. Epelde and E. Luque (2017)                                                                                                     | 3.00  | Spain          | Journal of computational science       | Empirical     | Hospital - emergency department                                   |
| Longo, F. (2007)                                                                                                                                          | 4.27  | Italy          | Health care management review          | Non-empirical | Leadership - change management                                    |
| Lorthios-Guilledroit, A., L. Richard and J. Filiatrault (2018)                                                                                            | 1.00  | Canada         | Evaluation and program planning        | Review        | Health promotion - community care                                 |
| Luria, J. W., S. E. Muething, P. J. Schoettker and U. R. Kotagal (2006)                                                                                   | 6.08  | USA            | Pediatric clinics of north america     | Non-empirical | Safety - paediatrics                                              |

|                                                                                                                                                     |      |                |                                                         |               |                                                                                                          |
|-----------------------------------------------------------------------------------------------------------------------------------------------------|------|----------------|---------------------------------------------------------|---------------|----------------------------------------------------------------------------------------------------------|
| MacLean, S., L. Berends and J. Mugavin (2013)                                                                                                       | 0.67 | Australia      | Australian journal of primary health                    | Empirical     | Primary care - drug and alcohol - improvement                                                            |
| Mahajan, A., S. D. Islam, M. J. Schwartz and M. Cannesson (2017)                                                                                    | 0    | USA            | Anesthesia & analgesia                                  | Non-empirical | Hospital - perioperative services - process improvement                                                  |
| Marchal, B., S. Belle, V. De Brouwere and S. Witter (2013)                                                                                          | 3.40 | Belgium        | Bmc health services research                            | Non-empirical | Health care policy                                                                                       |
| Mark, A. and M. Jones (2013)                                                                                                                        | 1.00 | United Kingdom | The international journal of health planning management | Non-empirical | Health care systems - instability/disturbance                                                            |
| Markham, F. W. (1998)                                                                                                                               | 0.50 | USA            | Theoretical medicine and bioethics                      | Non-empirical | Education - medical                                                                                      |
| Marks, E. (2013)                                                                                                                                    | 3.80 | USA            | Jama internal medicine                                  | Non-empirical | Hospital - readmission rates                                                                             |
| Marsland, S. and L. Buchan (2004)                                                                                                                   | 0.93 | United Kingdom | Medinfo                                                 | Non-empirical | Health informatics                                                                                       |
| Martin, C. and J. Sturmberg (2009)                                                                                                                  | 6.89 | Canada         | Journal of evaluation in clinical practice              | Non-empirical | Primary care - chronic care (health promotion, prevention, self-management, disease control. Treatment). |
| Martin, C. M. and J. P. Sturmberg (2005)                                                                                                            | 5.92 | Canada         | Medical journal of australia                            | Non-empirical | Primary care                                                                                             |
| Mash, B. J., P. Mayers, H. Conradie, A. Orayn, M. Kuiper and J. Marais (2008)                                                                       | 2.80 | South Africa   | Education for health                                    | Empirical     | Primary care                                                                                             |
| Matheson, A., K. Dew and J. Cumming (2009)                                                                                                          | 3.11 | New Zealand    | Health promotion journal of australia                   | Empirical     | Community health - health inequality                                                                     |
| Matlow, A. G., J. G. Wright, B. Zimmerman, K. Thomson and M. Valente (2006)                                                                         | 5.00 | Canada         | Quality and safety in health care                       | Non-empirical | Coordination of care, paediatrics                                                                        |
| Matthews, J. I. and P. T. Thomas (2007)                                                                                                             | 2.18 | United Kingdom | International journal of health care quality assurance  | Empirical     | Learning                                                                                                 |
| McAllister, C., L. K. Leykum, H. Lanham, H. S. Reisinger, J. L. Kohn, R. Palmer, C. Pezzia, M. Agar, M. Parchman, J. Pugh and R. R. McDaniel (2014) | 3.50 | USA            | Journal of hospital medicine                            | Empirical     | Hospital - teams relationship with patient outcomes                                                      |
| McConnell, E. S., D. Lekan-Rutledge, B. Nevidjon and R. Anderson (2004)                                                                             | 2.07 | USA            | Journal of nursing education                            | Non-empirical | Education - aged care                                                                                    |
| McDaniel, R. R. (1997)                                                                                                                              | 9.38 | USA            | Health care management review                           | Non-empirical | Leadership/management                                                                                    |

|                                                                                  |       |                |                                            |                    |                                         |
|----------------------------------------------------------------------------------|-------|----------------|--------------------------------------------|--------------------|-----------------------------------------|
| McDaniel, R. R., Jr. (1999)                                                      | 0.11  | USA            | Frontiers of health service management     | Unable to classify | Leadership/management                   |
| McDaniel, R. R., M. E. Jordan and B. F. Fleeman (2003)                           | 10.80 | USA            | Health care management review              | Non-empirical      | Learning                                |
| McHattie, L.-S., G. Cumming and T. French (2014)                                 | 3.00  | United Kingdom | Medicine 2.0                               | Non-empirical      | Person-centred care                     |
| McKenzie, A., E. Sokpo and A. Ager (2014)                                        | 1.00  | South Africa   | Journal of public health in africa         | Empirical          | Public health                           |
| McKeon, L. M., J. D. Oswaks and P. D. Cunningham (2006)                          | 5.75  | USA            | Critical nurse specialist                  | Non-empirical      | Hospital – teams                        |
| McKimm, J. and A. Till (2015).                                                   | 2.33  | United Kingdom | British journal of hospital medicine       | Non-empirical      | Clinical leadership                     |
| McKinney, S. H., K. Corazzini, R. A. Anderson, R. Sloane and N. G. Castle (2016) | 1.50  | USA            | Health care management review              | Empirical          | Nursing home - leadership – nursing     |
| McMurtry, A. (2010)                                                              | 5.33  | Canada         | Journal of interprofessional care          | Empirical          | Educational                             |
| McMurtry, A., S. Rohse and K. N. Kilgour (2016)                                  | 9.50  | Canada         | Medical education                          | Non-empirical      | Education - interprofessional learning  |
| Mennin, S. (2010)                                                                | 17.25 | USA            | Medical education                          | Non-empirical      | Education - learning - medicine         |
| Mennin, S. (2010)a                                                               | 3.63  | USA            | Journal of evaluation in clinical practice | Non-empirical      | Education                               |
| Merry, A. F. (2011)                                                              | 0.57  | New Zealand    | The journal of extracorporeal technology   | Non-empirical      | Safety - decision making                |
| Miles, A. (2009)                                                                 | 4.22  | United Kingdom | Journal of evaluation in clinical practice | Non-empirical      | Medicine and healthcare                 |
| Miller, W. L., B. F. Crabtree, P. A. Nutting, K. C. Stange and C. R. Jaen (2010) | 18.13 | USA            | Annals of family medicine                  | Non-empirical      | Primary care                            |
| Miller, W. L., B. F. Crabtree, R. McDaniel and K. C. Stange (1998)               | 14.35 | USA            | Journal of family practice                 | Non-empirical      | Primary care                            |
| Miller, W. L., R. R. McDaniel, B. F. Crabtree and K. C. Stange (2001)            | 14.82 | USA            | Journal of family practice                 | Empirical          | Primary care                            |
| Minas, H. (2005)                                                                 | 3.54  | Australia      | Australian psychiatry                      | Non-empirical      | Leadership- for change in mental health |

|                                                                                                                                                                           |       |                 |                                               |                    |                                                   |
|---------------------------------------------------------------------------------------------------------------------------------------------------------------------------|-------|-----------------|-----------------------------------------------|--------------------|---------------------------------------------------|
| Mitchell, D. (2014)                                                                                                                                                       | 0.50  | United Kingdom  | Journal of evaluation in clinical practice    | Non-empirical      | Patient perspectives                              |
| Mitchell, G. J., N. Cross, M. Wilson, S. Biernacki, W. N. Wong, B. Adib and D. Rush (2013)                                                                                | 2.00  | Canada          | Nursing research and practice                 | Non-empirical      | Chronic illness management - nursing health coach |
| Mitleton-Kelly, E. (2011)                                                                                                                                                 | 7.86  | United Kingdom  | The learning organization                     | Empirical          | Health system sustainability                      |
| Mohr, J. J., P. Batalden and P. Barach (2004)                                                                                                                             | 10.36 | USA             | Quality and safety in health care             | Non-empirical      | Health care organisations generally               |
| Monrouxe, L. V., C. E. Rees and W. Hu (2011)                                                                                                                              | 18.43 | United Kingdom  | Medical education                             | Empirical          | Education – medicine                              |
| Moretti-Pires, R. O. (2009)                                                                                                                                               | 10.89 | Brazil          | Interface - comunicação, saúde, educação      | Empirical          | Primary care                                      |
| Morton, A. and J. Cornwell (2009)                                                                                                                                         | 3.33  | United Kingdom  | Bmj                                           | Non-empirical      | Hospital - process improvement                    |
| Mowles, C., A. van der Gaag and J. Fox (2010)                                                                                                                             | 4.00  | United Kingdom  | Journal of health organization and management | Non-empirical      | Health care systems - change                      |
| Mulready-Shick, J. and K. Flanagan (2014)                                                                                                                                 | 5.00  | USA             | Nursing education perspective                 | Empirical          | Education                                         |
| Munday, D. F., S. A. Johnson and F. E. Griffiths (2003)                                                                                                                   | 1.67  | United Kingdom  | Palliative medicine                           | Non-empirical      | Palliative care                                   |
| Murai, M., K. Kitamura and M. D. Fetters (2005)                                                                                                                           | 2.46  | USA             | Bmc medical education                         | Empirical          | Primary care – education                          |
| Murray, P. J. (1992)                                                                                                                                                      | 0.12  | United Kingdom  | Intensive and critical care nursing           | Non-empirical      | Nursing - critical care - education               |
| Nardi, R., G. Scanelli, S. Corrao, I. Iori, G. Mathieu and R. C. Amatrian (2007)                                                                                          | 10.00 | Italy           | European journal of internal medicine         | Non-empirical      | Internal medicine                                 |
| Nardi, R., T. Fabbri, G. Belmonte, P. Leandri, M. Mazzetti, A. Pasquale, M. Reta, C. Rizzi, G. Scanelli, I. Iori, G. Gussoni, C. Pedace, G. Mathieu and A. Mazzone (2009) | 1.20  | Italy           | Italian journal of medicine                   | Unable to classify | Internal medicine - evidence based medicine       |
| Nieuwenhuijze, M., S. Downe, H. Gottfreosdottir, M. Rijnders, A. du Preez and P. V. Rebelo (2015)                                                                         | 1.33  | The Netherlands | Midwifery                                     | Review             | Hospital – midwifery                              |

|                                                                                                                  |       |                |                                                |               |                                                             |
|------------------------------------------------------------------------------------------------------------------|-------|----------------|------------------------------------------------|---------------|-------------------------------------------------------------|
| Noel, P. H., H. J. Lanham, R. F. Palmer, L. K. Leykum and M. L. Parchman (2013)                                  | 11.00 | USA            | Health care management review                  | Empirical     | Primary care - chronic care-teamwork – learning             |
| Noll, D. C. (1996).                                                                                              | 0     | USA            | Medical group management journal               | Non-empirical | Management/leadership                                       |
| Noll, D. C. (1997)                                                                                               | 0.19  | USA            | Medical group management journal               | Non-empirical | Healthcare systems generally                                |
| Norman, C. D. (2009)                                                                                             | 7.67  | Canada         | Journal of evaluation in clinical practice     | Non-empirical | Health promotion                                            |
| Norman, C. D. (2013)                                                                                             | 1.60  | Canada         | Journal of evaluation in clinical practice     | Non-empirical | Education                                                   |
| Norman, C. D., J. Charnaw-Burger, A. L. Yip, S. Saad and C. Lombardo (2010)                                      | 2.88  | Canada         | Journal of evaluation in clinical practice     | Non-empirical | Learning - networks, knowledge generation                   |
| Norman, G. (2011)                                                                                                | 3.71  | Canada         | Medical education                              | Non-empirical | Medicine – education                                        |
| Notarnicola, I., C. Petrucci, M. R. De Jesus Barbosa, F. Giorgi, A. Stievano, G. Rocco and L. Lancia (2017)      | 2.00  | Italy          | International journal of nursing practice      | Review        | Nursing                                                     |
| Olive, P. (2017)                                                                                                 | 1.00  | United Kingdom | Journal of clinical nursing                    | Empirical     | Hospital - ED following intimate partner violence           |
| Olive, P. (2017)a                                                                                                | 0.50  | United Kingdom | Journal of clinical nursing                    | Empirical     | Hospital - emergency department - intimate partner violence |
| Orlowski, S., S. Lawn, M. Ben, A. Venning, G. Jones, M. Winsall, G. Antezana, N. Bidargaddi and P. Musiat (2017) | 0.50  | Australia      | International journal of mental health nursing | Empirical     | Mental health services                                      |
| Orr, M., M. Orr and S. Sankaran (2007)                                                                           | 2.00  | New Zealand    | Emergence-complexity & organization            | Empirical     | IT system implementation                                    |
| O'Sullivan, T. L., C. E. Kuziemy, D. Toal-Sullivan and W. Cornell (2013)                                         | 22.60 | Canada         | Social science & medicine                      | Empirical     | Public health - health promotion in disaster                |
| Otten, R. and T. Chen (2011)                                                                                     | 1.29  | USA            | Creative nursing                               | Non-empirical | Leadership - nursing - working relationships                |
| Oyeleye, O., P. Hanson, N. O'Connor and D. Dunn (2013)                                                           | 16.80 | USA            | Journal of nursing administration              | Empirical     | Nursing - workplace bullying                                |
| Paley, J. (2007)                                                                                                 | 8.45  | United Kingdom | Nursing inquiry                                | Non-empirical | Nursing - cardiac rehabilitation                            |

|                                                                                                                                     |        |                |                                                          |               |                                                     |
|-------------------------------------------------------------------------------------------------------------------------------------|--------|----------------|----------------------------------------------------------|---------------|-----------------------------------------------------|
| Paley, J. (2010)                                                                                                                    | 7.13   | United Kingdom | Journal of health services research and policy           | Non-empirical | Healthcare research discipline                      |
| Paley, J. and G. Eva (2011)                                                                                                         | 7.71   | United Kingdom | International journal of nursing studies                 | Non-empirical | Research - academic conceptualisation of healthcare |
| Papadopoulos, M. C., M. Hadjitheodossiou, C. Chrysostomou, C. Hardwidge and B. A. Bell (2001)                                       | 1.65   | United Kingdom | Journal of the royal society of medicine                 | Empirical     | Health care system whole - wait lists for surgery   |
| Parchman, M. L., J. A. Pugh, S. D. Culler, P. H. Noel, N. H. Arar, R. L. Romero and R. F. Palmer (2008)                             | 2.50   | USA            | Implementation science                                   | Non-empirical | Primary care – diabetes                             |
| Patel, A. M., T. M. Sundt 3rd and P. Varkey (2008)                                                                                  | 0.70   | USA            | Minnesota medicine                                       | Non-empirical | Medical practice                                    |
| Patel, V. L., J. Zhang, N. A. Yoskowitz, R. Green and O. R. Sayan (2008)                                                            | 12.70  | USA            | Journal of biomedical informatics                        | Non-empirical | Hospital – decision making - ICU                    |
| Patterson, M. and E. S. Deutsch (2015)                                                                                              | 5.00   | USA            | Current problems in pediatric and adolescent health care | Non-empirical | Safety                                              |
| Pauly, B., M. MacDonald, T. Hancock, W. Martin and K. Perkin (2013)                                                                 | 3.40   | Canada         | Bmc public health                                        | Non-empirical | Public health services                              |
| Peirce, J. C. (2000)                                                                                                                | 0.06   | USA            | Health care management review                            | Non-empirical | Health care organisations                           |
| Pelletier, D., S. Gervais, H. Hafeez-Ur-Rehman, D. Sanou and J. Tumwine (2018)                                                      | 0      | USA            | International journal of health planning and management  | Empirical     | Policy                                              |
| Penney, L. S., L. K. Leykum, P. Noel, E. P. Finley, H. J. Lanham and J. Pugh (2018)                                                 | 0      | USA            | Bmj open                                                 | Non-empirical | Hospital - readmission rates                        |
| Penprase, B. and D. Norris (2005)                                                                                                   | 2.92   | USA            | Nursing leadership forum                                 | Non-empirical | Leadership                                          |
| Perez, B. and A. Liberman (2011)                                                                                                    | 0.14   | USA            | The health care manager                                  | Non-empirical | Decision making                                     |
| Pitkaaho, T., P. Partanen, M. Miettinen and K. Vehvilainen-Julkunen (2015)                                                          | 4.25   | Finland        | Journal of advanced nursing                              | Empirical     | Hospital                                            |
| Piven, M. L., N. Ammarell, D. Bailey, K. Corazzini, C. S. Colon-Emeric, D. Lekan-Rutledge, Q. Utley-Smith and R. A. Anderson (2006) | 2.92   | USA            | Western journal of nursing research                      | Empirical     | Nursing home                                        |
| Plsek, P. E. and T. Greenhalgh (2001)                                                                                               | 110.06 | USA            | Bmj                                                      | Non-empirical | Healthcare – general                                |

|                                                                                                                          |       |                |                                                            |               |                                                              |
|--------------------------------------------------------------------------------------------------------------------------|-------|----------------|------------------------------------------------------------|---------------|--------------------------------------------------------------|
| Plsek, P. E. and T. Wilson (2001)                                                                                        | 41.41 | USA            | Bmj                                                        | Non-empirical | Leadership                                                   |
| Pradebon, V. M., A. L. Erdmann, J. L. Leite, S. B. S. de Lima and A. G. Prochnow (2011)                                  | 0.71  | Brazil         | Acta paulista de enfermagem                                | Empirical     | Hospital - paediatric ICU                                    |
| Priesmeyer, H. R. and L. F. Sharp (1995)                                                                                 | 0.61  | USA            | Quality management in health care                          | Non-empirical | Leadership - management administration                       |
| Priesmeyer, H. R., L. F. Sharp, L. Wammack and J. D. Mabrey (1996)                                                       | 0.64  | USA            | Quality management in health care                          | Non-empirical | Clinical pathways and care continuity                        |
| Provost, S. M., H. J. Lanham, L. K. Leykum, R. R. McDaniel and J. Pugh (2015)                                            | 14.00 | USA            | Health care management review                              | Empirical     | Collaboration and teamwork – safety                          |
| Puga, F., K. R. Stevens and D. I. Patel (2013)                                                                           | 1.20  | USA            | Nursing research and practice                              | Empirical     | Hospital - collaborative, transdisciplinary research network |
| Pype, P., D. Krystallidou, M. Deveugele, F. Mertens, S. Rubinelli and I. Devisch (2017)                                  | 2.00  | Belgium        | Patient education and counseling                           | Empirical     | Collaboration and teamwork                                   |
| Quinn, G. R., E. Le, K. Soni, G. Berger, Y. E. Mak and R. Pierce (2014)                                                  | 1.75  | USA            | The joint commission journal on quality and patient safety | Empirical     | Hospital - emergency department                              |
| Ramaswamy, R., J. Reed, N. Livesley, V. Boguslavsky, E. G. Ellorio, S. Sax, D. Houleymata, L. Kimble and G. Parry (2018) | 0     | USA            | International journal for quality in health care           | Non-empirical | Quality improvement                                          |
| Rangachari, P. (2008)                                                                                                    | 1.20  | USA            | Quality management in health care                          | Empirical     | Hospital - quality indicators                                |
| Rantz, M. J., M. K. Flesner and M. Zwygart-Stauffacher (2010)                                                            | 1.75  | USA            | Journal of nursing care quality                            | Non-empirical | Nursing home - quality indicators                            |
| Rantz, M. J., M. Zwygart-Stauffacher, M. Flesner, L. Hicks, D. Mehr, T. Russell and D. Minner (2013)                     | 4.40  | USA            | Journal of the american medical directors association      | Empirical     | Nursing home                                                 |
| Redfern, S. and S. Christian (2003)                                                                                      | 8.67  | United Kingdom | Journal of evaluation in clinical practice                 | Empirical     | Community and inpatient                                      |
| Reid, J., K. Stone, L. Huang and E. S. Deutsch (2016)                                                                    | 1.00  | USA            | Clinical pediatric emergency medicine                      | Non-empirical | Hospital - safety - paediatric medicine                      |
| Restau, J. and P. Green (2014)                                                                                           | 0     | USA            | Critical care nursing clinics of north america             | Non-empirical | Hospital - ICU - palliative care                             |
| Reynolds, M., E. Sarriot, R. C. Swanson and E. Rusoja (2018)                                                             | 1.00  | United Kingdom | Journal of evaluation in clinical practice                 | Non-empirical | Health care generally                                        |

|                                                                                                                          |       |                 |                                                           |                    |                                             |
|--------------------------------------------------------------------------------------------------------------------------|-------|-----------------|-----------------------------------------------------------|--------------------|---------------------------------------------|
| Rhodes, M. G. (2013)                                                                                                     | 1.40  | The Netherlands | International journal of health policy management         | Non-empirical      | Health systems                              |
| Rhydderch, M., G. Elwyn, M. Marshall and R. Grol (2004)                                                                  | 6.57  | United Kingdom  | Quality and safety in health care                         | Non-empirical      | Primary care – indicators                   |
| Ribesse, N., P. Bossyns, B. Marchal, H. Karemere, C. J. Burman and J. Macq (2017)                                        | 1.67  | Belgium         | Global health promotion                                   | Non-empirical      | Health systems reform                       |
| Rice, W. P. (1996)                                                                                                       | 0.09  | USA             | Journal of clinical engineering                           | Unable to classify | Health care generally                       |
| Rickles, D., P. Hawe and A. Shiell (2007)                                                                                | 19.55 | Canada          | Journal of epidemiology and community health              | Non-empirical      | Health care generally                       |
| Righi, A. W., P. Wachs and T. A. Saurin (2012)                                                                           | 1.50  | Brazil          | Work                                                      | Empirical          | Emergency medicine - ambulance              |
| Rogers, H., L. Maher and P. E. Plsek (2008)                                                                              | 1.50  | United Kingdom  | Bmj                                                       | Non-empirical      | Health care system                          |
| Rojas-Mendizabal, V., A. Serrano-Santoyo, R. Conte-Galvan, S. Villarreal-Reyes and R. Rivera-Rodriguez (2017)            | 0     | Mexico          | Ingeniería e investigación                                | Non-empirical      | Technology e-health – implementation        |
| Rojas-Mendizabal, V., A. Serrano-Santoyo, R. Conte-Galvan, S. Villarreal-Reyes and R. Rivera-Rodriguez (2017)a           | 0     | Mexico          | Ingeniería e investigación                                | Non-empirical      | E-Health – technology                       |
| Royeen, C. B. and A. J. Luebben (2002)                                                                                   | 0.56  | USA             | Occupational therapy in health care                       | Non-empirical      | Allied health - occupational therapy        |
| Rusoja, E., D. Haynie, J. Sievers, N. Mustafee, F. Nelson, M. Reynolds, E. Sarriot, R. C. Swanson and B. Williams (2018) | 1.00  | USA             | Journal of evaluation in clinical practice                | Review             | Research - complexity science in healthcare |
| Santos, F. A. P. S. d., B. C. Enders, V. E. P. Santos, D. N. A. Dantas and L. S. M. V. d. Miranda (2016)                 | 0     | Brazil          | Escola anna nery                                          | Non-empirical      | Health system - obstetric care              |
| Sargeant, J. (2009)                                                                                                      | 16.56 | Canada          | Journal of continuing education in the health professions | Non-empirical      | Education - interprofessional education     |
| Sarriot, E. and M. Kouletio (2015)                                                                                       | 6.33  | USA             | Systemic practice and action research                     | Non-empirical      | Health system - sustainability              |



|                                                                                                                |      |                |                                        |                    |                                               |
|----------------------------------------------------------------------------------------------------------------|------|----------------|----------------------------------------|--------------------|-----------------------------------------------|
| Schneider, H., R. English, H. Tabana, T. Padayachee and M. Orgill (2014)                                       | 3.50 | South Africa   | Bmc health services research           | Empirical          | Health system - primary care - implementation |
| Schoo, A. and K. Kumar (2018)                                                                                  | 0    | Australia      | The clinical teacher                   | Non-empirical      | Education                                     |
| Schulz, V. M., A. M. Crombeen, D. Marshall, J. Shadd, K. A. LaDonna and L. Lingard (2017)                      | 1.00 | Canada         | Journal of pain and symptom management | Empirical          | Heart failure                                 |
| Scott, K. and A. Steinbinder (2009)                                                                            | 0.22 | USA            | Nursing administration quarterly       | Unable to classify | Change and improvement                        |
| Scott, K. and J. Van Norman (2009)                                                                             | 1.11 | USA            | Nursing administration quarterly       | Unable to classify | EHR implementation                            |
| Sharp, L. F. and H. R. Priesmeyer (1995)                                                                       | 1.43 | USA            | Quality management in health care      | Non-empirical      | Health care organisations - generally         |
| Shen, W., L. Jiang, M. Zhang, Y. Ma, G. Jiang and X. He (2014)                                                 | 0.75 | China          | Chinese medical journal                | Non-empirical      | Research - mass casualty incidents            |
| Shirey, M. R., P. R. Ebright and A. M. McDaniel (2013)                                                         | 7.60 | USA            | Journal of nursing management          | Empirical          | Leadership - nursing - decision making        |
| Silva, I. R., A. M. T. Gomes, G. V. Valadares, N. L. P. dos Santos, T. P. da Silva and J. L. Leite (2015)      | 1.33 | Brazil         | Revista gaucha de enfermagem           | Empirical          | Nursing - knowledge of aids/std               |
| Silva, Í. R., J. L. Leite, M. A. Trevizan, I. A. C. Mendes, T. P. d. Silva and S. M. d. S. B. Lins (2017)      | 0    | Brazil         | Escola anna nery                       | Empirical          | Education - nursing                           |
| Silva, O., E. D. Alves and M. C. S. Rodrigues (2014)                                                           | 0.50 | Brazil         | Cultura de los cuidados                | Empirical          | Nursing - education                           |
| Simmons, M. (2003)                                                                                             | 0.80 | United Kingdom | Journal of hospital infection          | Non-empirical      | Management of communicable diseases           |
| Simpson, K. M., K. Porter, E. S. McConnell, C. Colón-Emeric, K. A. Daily, A. Stalzer and R. A. Anderson (2013) | 6.80 | USA            | Implementation science                 | Non-empirical      | Implementation/improvement                    |
| Sims, T. (2014)                                                                                                | 0    | USA            | Creative nursing                       | Unable to classify | Pregnancy                                     |
| Singh, R., J. Hickner, J. Mold and G. Singh (2014)                                                             | 1.75 | USA            | Journal of patient safety              | Empirical          | Primary health care - testing processes       |
| Singh, R., T. Servoss, M. Kalsman, C. Fox and G. Singh (2004)                                                  | 3.64 | USA            | Informatics in primary care            | Empirical          | Primary care                                  |

|                                                                                                                      |       |                 |                                                            |               |                                                     |
|----------------------------------------------------------------------------------------------------------------------|-------|-----------------|------------------------------------------------------------|---------------|-----------------------------------------------------|
| Smit, E. H. and J. J. L. Derksen (2015)                                                                              | 0.33  | The Netherlands | Nonlinear dynamics, psychology, and life sciences          | Non-empirical | Primary care - psychologists                        |
| Smit, E. H. D. and J. J. L. J. Derksen (2017)                                                                        | 0     | The Netherlands | Europe's journal of psychology                             | Empirical     | Primary care - psychology                           |
| Smith, C. S., C. Francovich, M. Morris, W. Hill, F. Langlois-Winkle, R. Rupper, C. Roth, S. Wheeler and A. Vo (2010) | 1.13  | USA             | Advances in health sciences education                      | Non-empirical | Education                                           |
| Smith, H., C. Kuziemyky and C. Champion (2018)                                                                       | 0     | Canada          | Canadian journal of surgery                                | Non-empirical | Hospital - surgery - physician extender             |
| Smits, S. J., J. A. Falconer, R. Morland and D. C. Strasser (1997)                                                   | 0.24  | USA             | Topics in stroke rehabilitation                            | Non-empirical | Rehabilitation - stroke                             |
| Snoeren, M. M. W. C., B. M. Janssen, T. J. H. Niessen and T. A. Abma (2016)                                          | 6.50  | The Netherlands | Health care analysis                                       | Empirical     | Nursing home - patient centredness - culture change |
| Soliman, M. and T. A. Saurin (2017)                                                                                  | 4.00  | Brazil          | Journal of manufacturing systems                           | Review        | Lean management                                     |
| Soubhi, H., E. A. Bayliss, M. Fortin, C. Hudon, M. van den Akker, R. Thivierge, N. Posel and D. Fleiszer (2010)      | 11.75 | Canada          | Annals of family medicine                                  | Non-empirical | Primary care                                        |
| Squires, A., S. J. Uyei, H. Beltran-Sanchez and S. A. Jones (2016)                                                   | 2.00  | USA             | Human resources for health                                 | Empirical     | Health care workforce - health systems              |
| Ssengooba, F., B. McPake and N. Palmer (2012)                                                                        | 15.50 | Uganda          | Social science & medicine                                  | Empirical     | Performance targets - health systems                |
| Stange, K. C. (2009)                                                                                                 | 7.78  | USA             | Annals of family medicine                                  | Non-empirical | Primary care - reform                               |
| Stange, K. C. (2011)                                                                                                 | 1.86  | USA             | American journal of preventive medicine                    | Non-empirical | Preventive health                                   |
| Sterns, S., S. C. Miller and S. Allen (2010)                                                                         | 6.50  | USA             | Journal of the american medical directors association      | Empirical     | Nursing home - culture change                       |
| Strand, R., G. Rortveit and E. Schei (2004)                                                                          | 1.43  | Norway          | Complexus                                                  | Non-empirical | Medical practice                                    |
| Stroebel, C. K., R. R. McDaniel Jr, B. F. Crabtree, W. L. Miller, P. A. Nutting and K. C. Stange (2005)              | 15.69 | USA             | The joint commission journal on quality and patient safety | Non-empirical | Primary care - quality improvement                  |
| Sturmberg, J. P. (2007)                                                                                              | 3.27  | Australia       | Australian family physician                                | Non-empirical | Clinical generally                                  |
| Sturmberg, J. P. (2007)                                                                                              | 1.09  | Australia       | Australian family physician                                | Non-empirical | Primary care - research                             |

|                                                                                                                                                                                      |       |                |                                               |               |                                                        |
|--------------------------------------------------------------------------------------------------------------------------------------------------------------------------------------|-------|----------------|-----------------------------------------------|---------------|--------------------------------------------------------|
| Sturmberg, J. P. and P. Cilliers (2009)                                                                                                                                              | 3.89  | Australia      | Journal of evaluation in clinical practice    | Non-empirical | Health care systems and practice generally             |
| Sturmberg, J. P., C. M. Martin and D. A. Katerndahl (2014)                                                                                                                           | 20.25 | Australia      | Annals of family medicine                     | Review        | Primary care                                           |
| Sweeney, K. G. and R. Mannion (2002)                                                                                                                                                 | 1.63  | United Kingdom | British journal of general practice           | Non-empirical | Clinical governance                                    |
| Tait, G. L. R., J. Bates, K. A. LaDonna, V. N. Schulz, P. H. Strachan, A. McDougall and L. Lingard (2015)                                                                            | 5.33  | Canada         | Journal of multidisciplinary healthcare       | Empirical     | Heart failure                                          |
| Tan, J., H. J. Wen and N. Awad (2005). "Health care and services delivery systems as complex adaptive systems." Communications of the Acm 48(5): 36-44                               | 11.23 | USA            | Communications of the acm                     | Non-empirical | Health care generally - service delivery system        |
| Tang, W. X., L. Wei and L. Zhang (2017)                                                                                                                                              | 0     | China          | International journal of integrated care      | Empirical     | Health system - health care reform for integrated care |
| Taylor, E., A. J. Card and M. Piatkowski (2018)                                                                                                                                      | 0     | USA            | Health environments research & design journal | Review        | Hospital - patient room                                |
| Therrien, M. C., J. M. Normandin and J. L. Denis (2017)                                                                                                                              | 0     | Canada         | Journal of health organization and management | Non-empirical | Hospital and wider health system                       |
| this ref is actually the Sturmberg, O'Halloran, Martin (2012) reference above they missed an author when referencing - line 532). Still missed in our library but please consolidate | 11.00 | Canada         | International journal of integrated care      | Empirical     | Integrated care                                        |
| Thomas, M. B. and S. Houston (2005)                                                                                                                                                  | 0.85  | USA            | Clinical nurse specialist                     | Non-empirical | Patient safety                                         |
| Thompson, D. S., J. Abourbih, L. Carter, G. Adams-Carpino, S. Berry, L. E. Graves and N. J. Ranger (2018)                                                                            | 0     | Canada         | Journal of interprofessional care             | Empirical     | Education - interprofessionalism                       |
| Thompson, D. S., X. Fazio, E. Kustra, L. Patrick and D. Stanley (2016)                                                                                                               | 14.00 | Canada         | Bmc health services research                  | Review        | Research - complexity science in healthcare            |
| Townsend, G. C., M. Kim and D. Sankey (2012)                                                                                                                                         | 2.17  | Australia      | European journal of dental education          | Non-empirical | Education - dentistry - problem-based learning         |
| Trenholm, S. and E. Ferlie (2013)                                                                                                                                                    | 5.00  | United Kingdom | Social science & medicine                     | Empirical     | Health system - response to disease                    |

|                                                                                        |      |                 |                                                 |               |                                       |
|----------------------------------------------------------------------------------------|------|-----------------|-------------------------------------------------|---------------|---------------------------------------|
| Valencia A, M. (2011)                                                                  | 2.14 | Colombia        | Revista facultad nacional de salud pública      | Non-empirical | Public health                         |
| Valeras, A., Gunn, W., and A. Valeras (2013)                                           | 0.40 | USA             | International journal of psychiatry in medicine | Non-empirical | Education                             |
| Vallis, M. (2015)                                                                      | 4.33 | Canada          | Canadian journal of diabetes                    | Non-empirical | Diabetes management                   |
| Van Beurden, E. K., A. M. Kia, A. Zask, U. Dietrich and L. Rose (2013)                 | 7.71 | Australia       | Health promotion international                  | Non-empirical | Health promotion                      |
| van de Wetering, R. and R. Batenburg (2014)                                            | 5.50 | The Netherlands | Journal of digital imaging                      | Empirical     | Hospital - IT                         |
| van der Vlegel-Brouwer, W. (2013)                                                      | 2.20 | The Netherlands | International journal of integrated care        | Non-empirical | Integrated care - policy-practice gap |
| van Rossum, T. R., F. Scheele, A. Scherpbier, H. E. Sluiter and I. C. Heyligers (2016) | 1.50 | The Netherlands | Bmc medical education                           | Non-empirical | Education - medicine                  |
| van Wietmarschen, H. A., H. M. Wortelboer and J. van der Greef (2018)                  | 4.00 | The Netherlands | Journal of evaluation in clinical practice      | Non-empirical | Health care generally                 |
| Varghese, J., V. R. Kutty, L. Paina and T. Adam (2014)                                 | 4.75 | India           | Health research policy and systems              | Empirical     | Public health - vaccination coverage  |
| Velde, B. P., A. G. Greer, D. C. Lynch and S. Escott-Stump (2002)                      | 0.69 | USA             | Journal of allied health                        | Non-empirical | Education                             |
| Velez Lapao, L. (2007)                                                                 | 3.09 | Portugal        | Methods of information in medicine              | Empirical     | Information/IT systems                |
| Vicenzi, A. E. (1994)                                                                  | 1.08 | USA             | Nursing science quarterly                       | Non-empirical | Nursing                               |
| Vieira, M., P. Klock, R. Costa and A. L. Erdmann (2009)                                | 0.33 | Colombia        | Aquichan                                        | Non-empirical | Nursing profession                    |
| Vogt, E. M. (2002)                                                                     | 0.94 | USA             | Drug safety                                     | Non-empirical | Medication safety                     |
| Vosman, F. and A. Niemeijer (2017)                                                     | 4.00 | The Netherlands | Medicine, health care and philosophy            | Non-empirical | Hospital - health care                |

|                                                                       |       |                 |                                                    |               |                                                                   |
|-----------------------------------------------------------------------|-------|-----------------|----------------------------------------------------|---------------|-------------------------------------------------------------------|
| Walls, M. E. and R. R. McDaniel, Jr. (1999)                           | 0.53  | USA             | Seminars for nurse managers                        | Non-empirical | Mergers - leadership - organisational change, nurse management    |
| Walton, M. (2016)                                                     | 2.50  | New Zealand     | Evidence and policy                                | Non-empirical | Public health - governance/policy                                 |
| Wang, L., X. Zhang, X. Liang and G. Bloom (2016)                      | 2.00  | China           | Globalization and health                           | Empirical     | Health care policy - global health system - antibiotic resistance |
| West, G. B. (2012)                                                    | 8.00  | United Kingdom  | The lancet                                         | Non-empirical | Medicine                                                          |
| West, G. B. (2012)a                                                   | 8.00  | USA             | The lancet                                         | Non-empirical | Medicine                                                          |
| Wilkinson, J., M. Goff, E. Rusoja, C. Hanson and R. C. Swanson (2017) | 1.00  | USA             | Journal of evaluation in clinical practice         | Review        | Health systems, generally                                         |
| Wilson, J. (2014)                                                     | 1.75  | United Kingdom  | Monash bioethics review                            | Non-empirical | Translation - evidence into practice - bioethics                  |
| Wilson, N. J. and M. J. Hatlie (2001)                                 | 0.59  | USA             | Journal of healthcare quality                      | Non-empirical | Patient safety                                                    |
| Wilson, T., T. Holt and T. Greenhalgh (2001)                          | 28.06 | United Kingdom  | Bmj                                                | Non-empirical | Clinical - general                                                |
| Wouters, E. F. M. and I. M. L. Vanderhoven (2009)                     | 0.56  | The Netherlands | Seminars in respiratory and critical care medicine | Non-empirical | Integrated care - chronic disease                                 |
| Zarowsky, C., S. Haddad and V.-K. Nguyen (2013)                       | 3.60  | South Africa    | Global health promotion                            | Non-empirical | Vulnerable groups in healthcare                                   |

|                                                             |      |        |                                  |                    |                          |
|-------------------------------------------------------------|------|--------|----------------------------------|--------------------|--------------------------|
| Zhao, J., H. Yang, H. Guo, Y. Li, Z. Zhang and S. Li (2010) | 0    | China  | Shengwu yixue gongchengxue zazhi | Unable to classify | Hospital                 |
| Zimmerman, B. (1999)                                        | 3.21 | Canada | Healthcare forum journal         | Non-empirical      | Uncertainty - leadership |
